# Supplementary material for: Sets2Networks: network inference from repeated observations of sets
Source: PubMed Central journal article supplement (PMC3443648; doi:10.1186/1752-0509-6-89), 2012-07-23

TFTC-type histone acetyl transferase complex

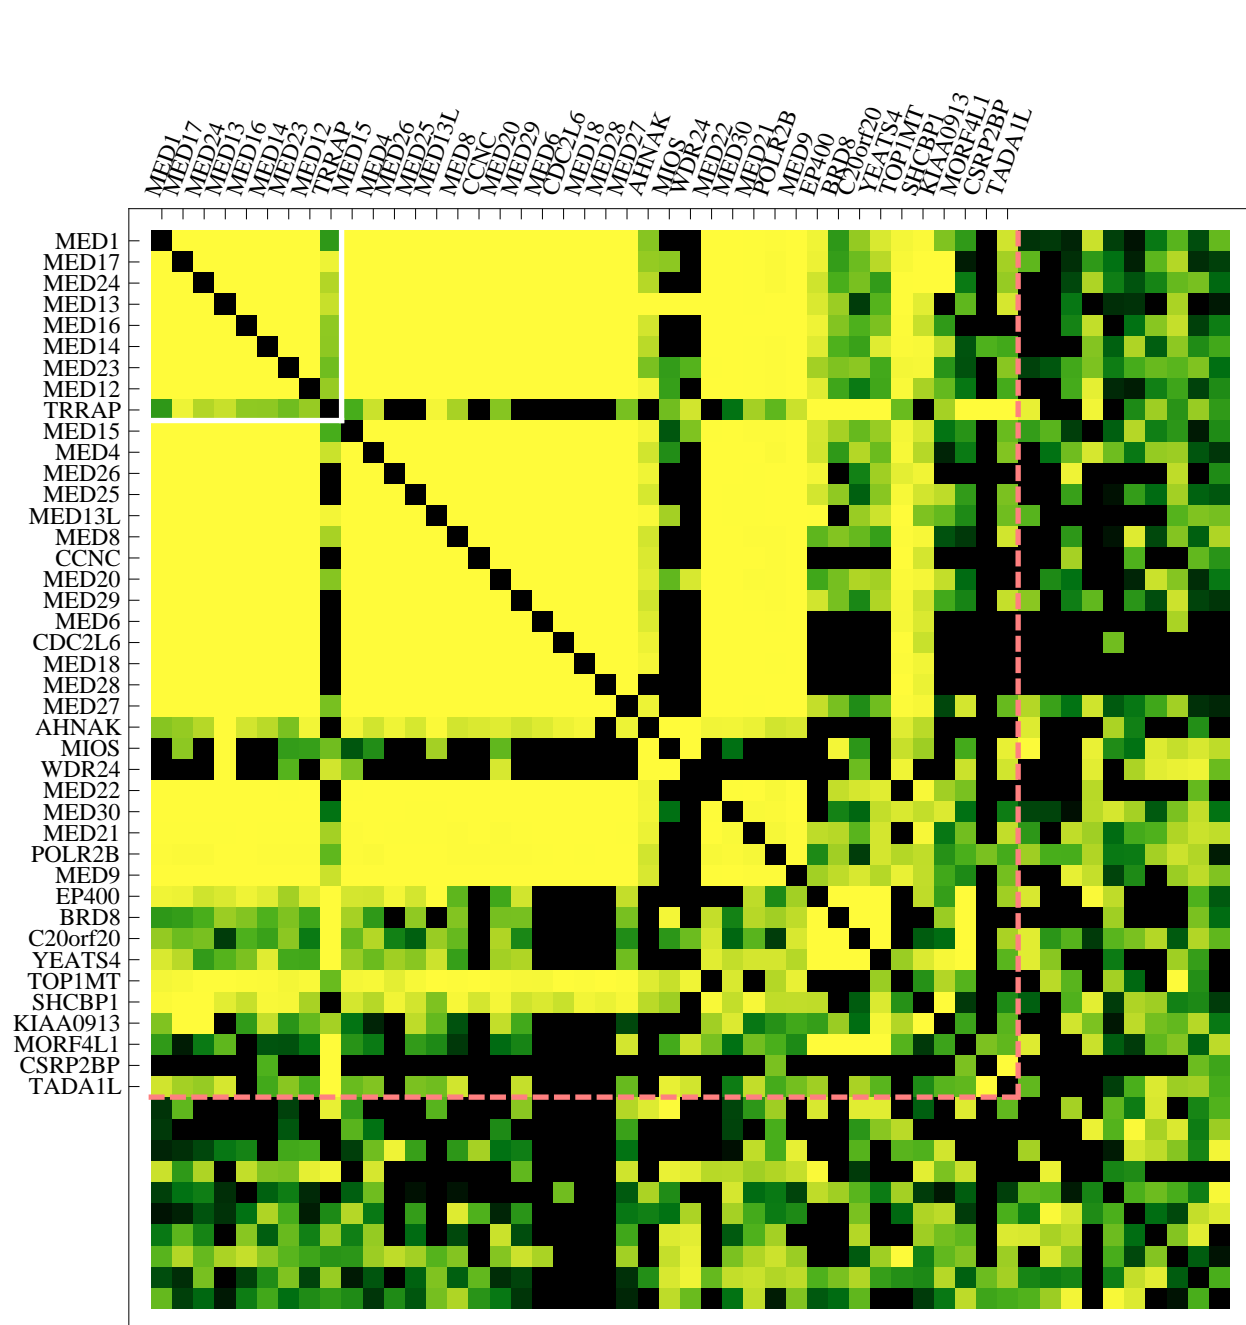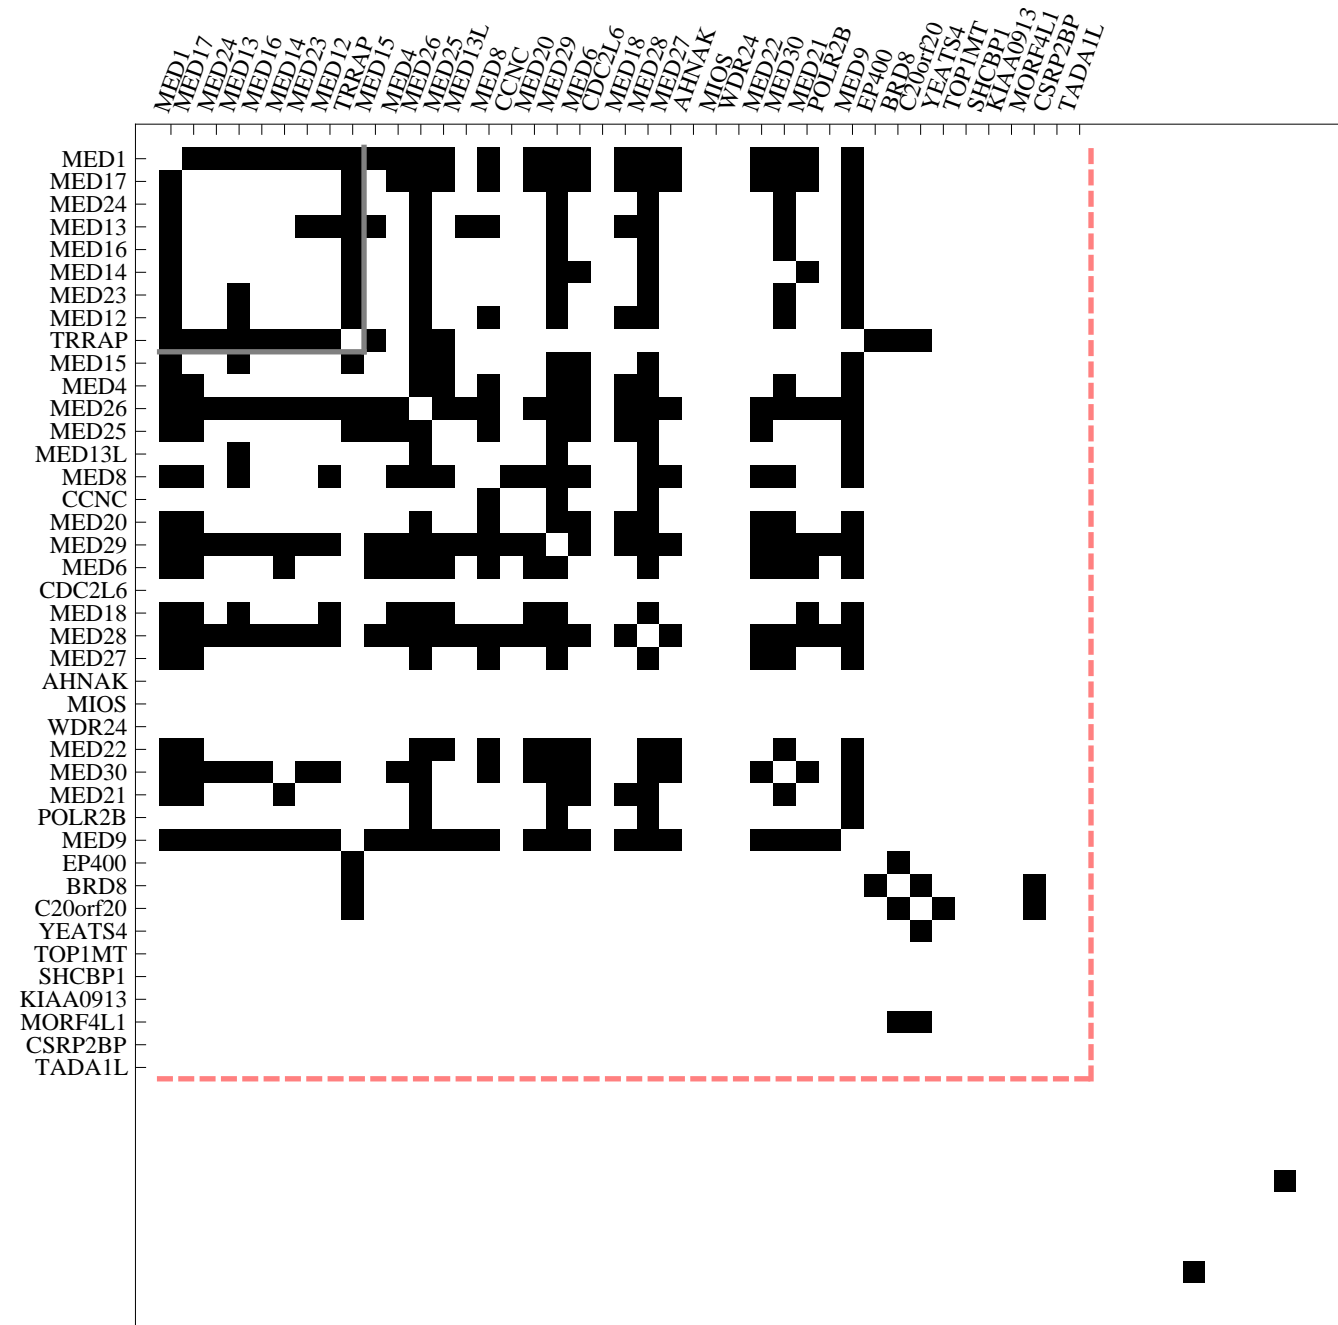

p300-CBP-p270-SWI/SNF complex

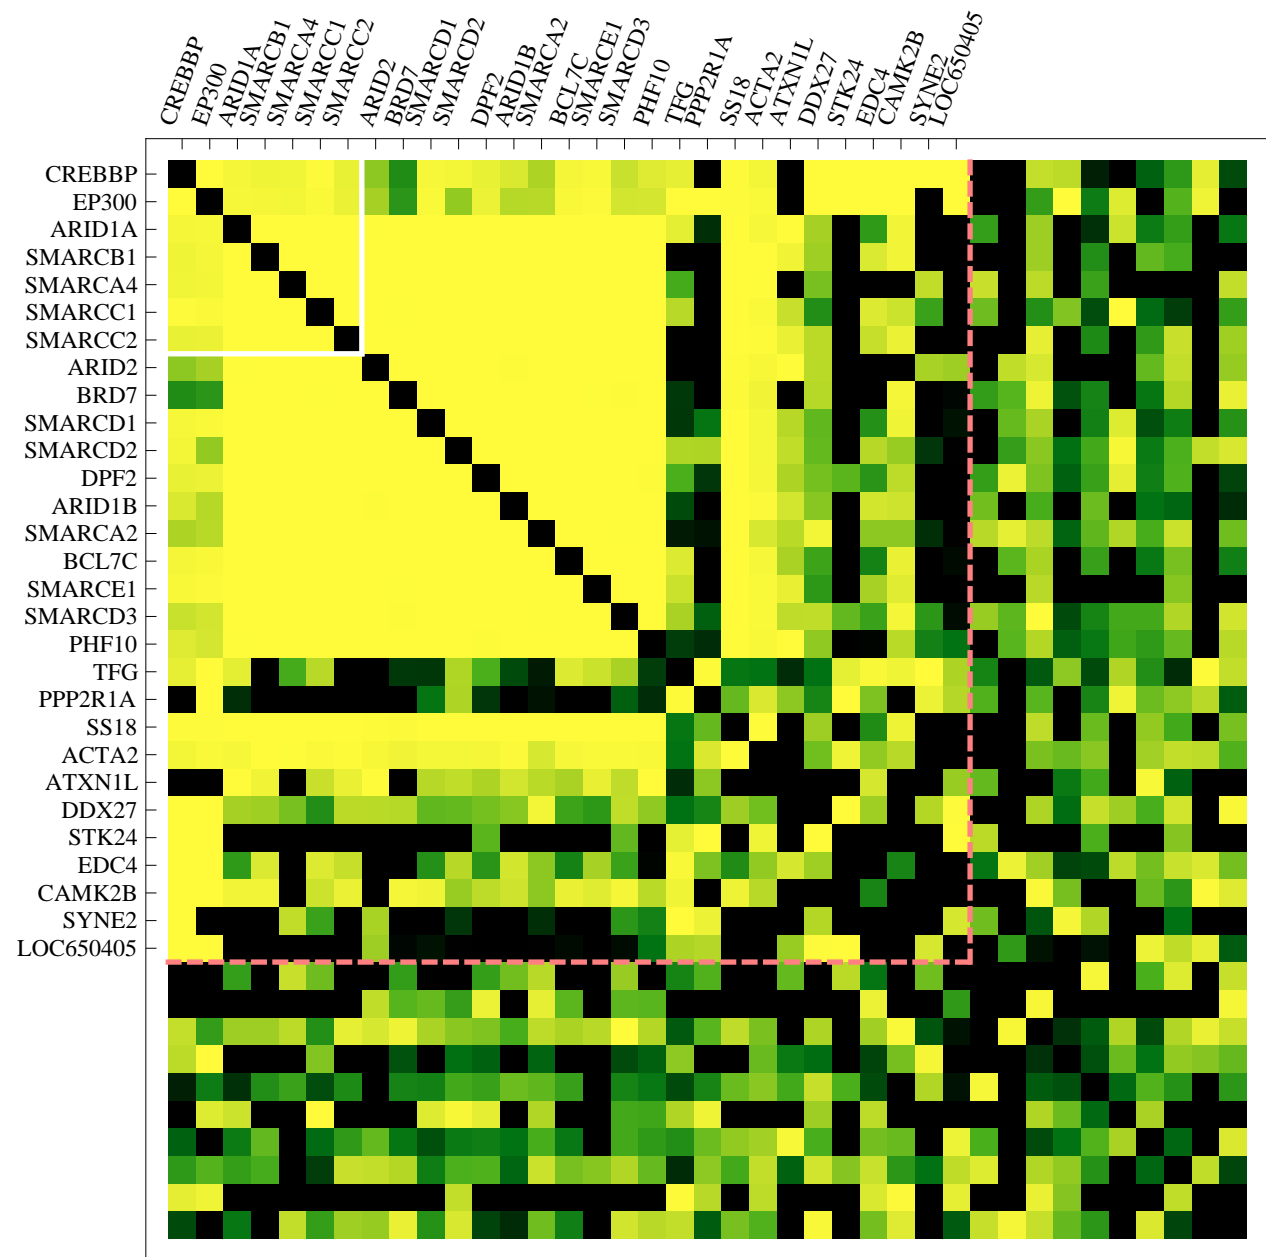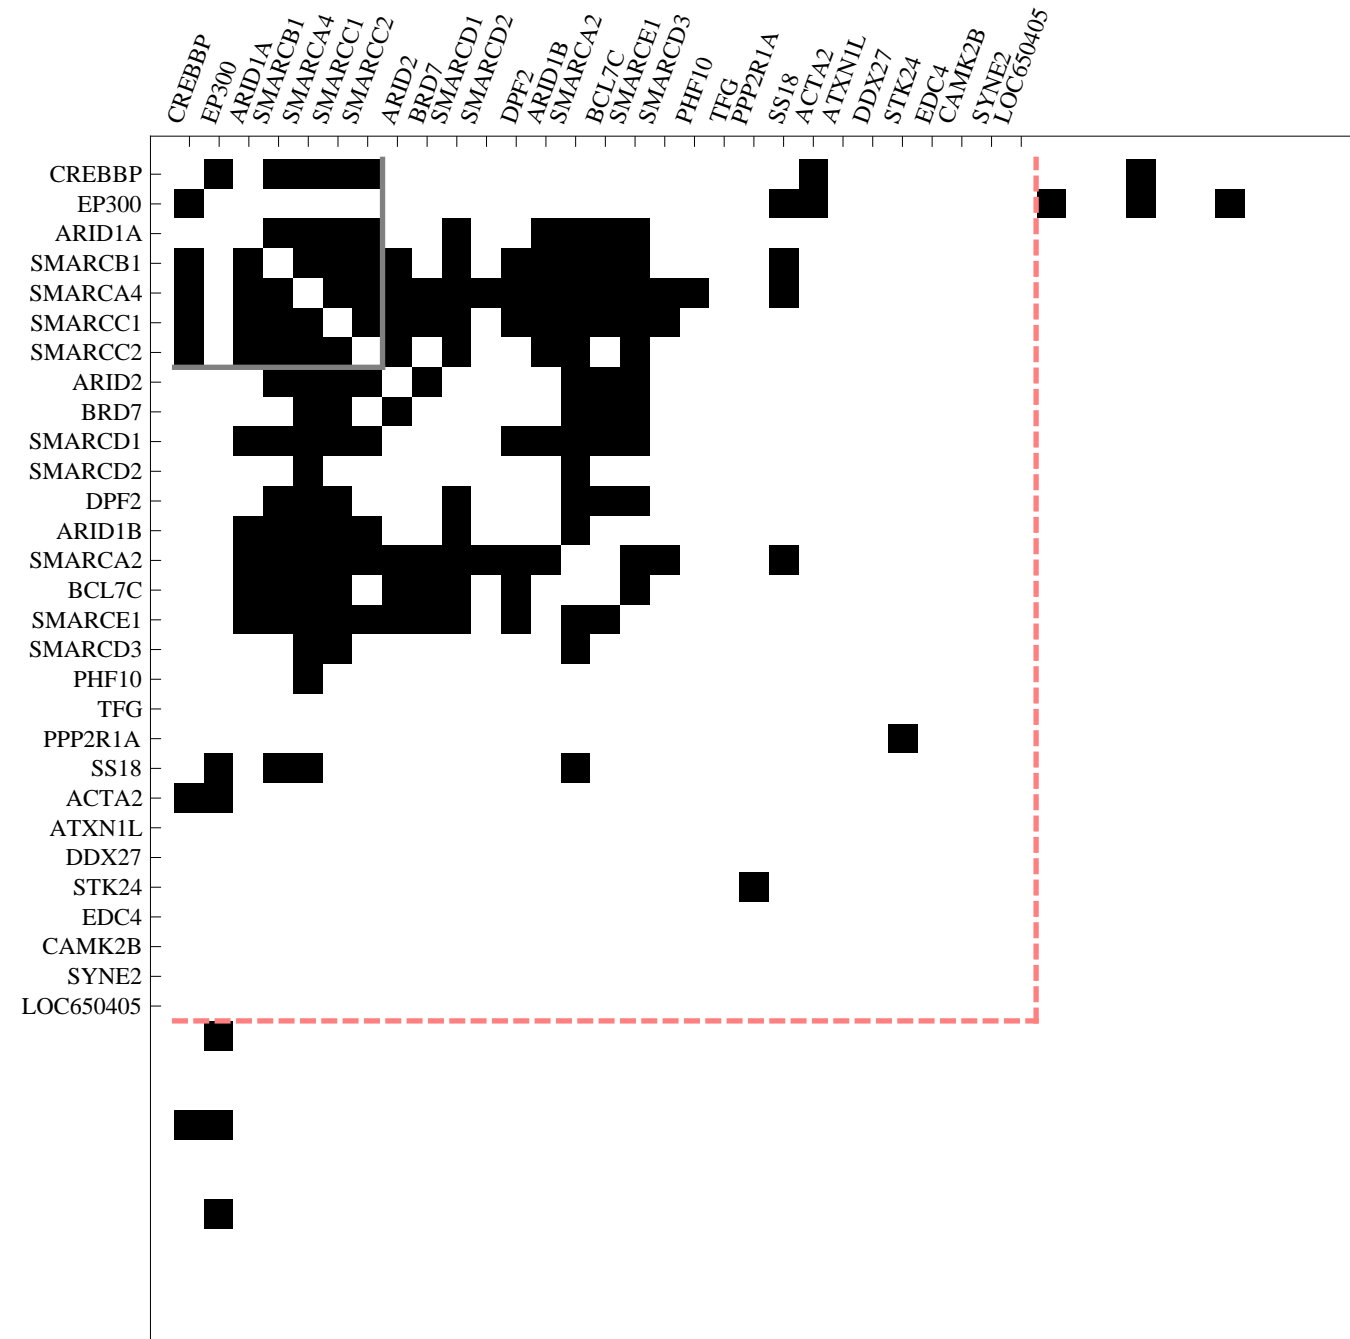

NRD complex (Nucleosome remodeling and deacetylation complex)

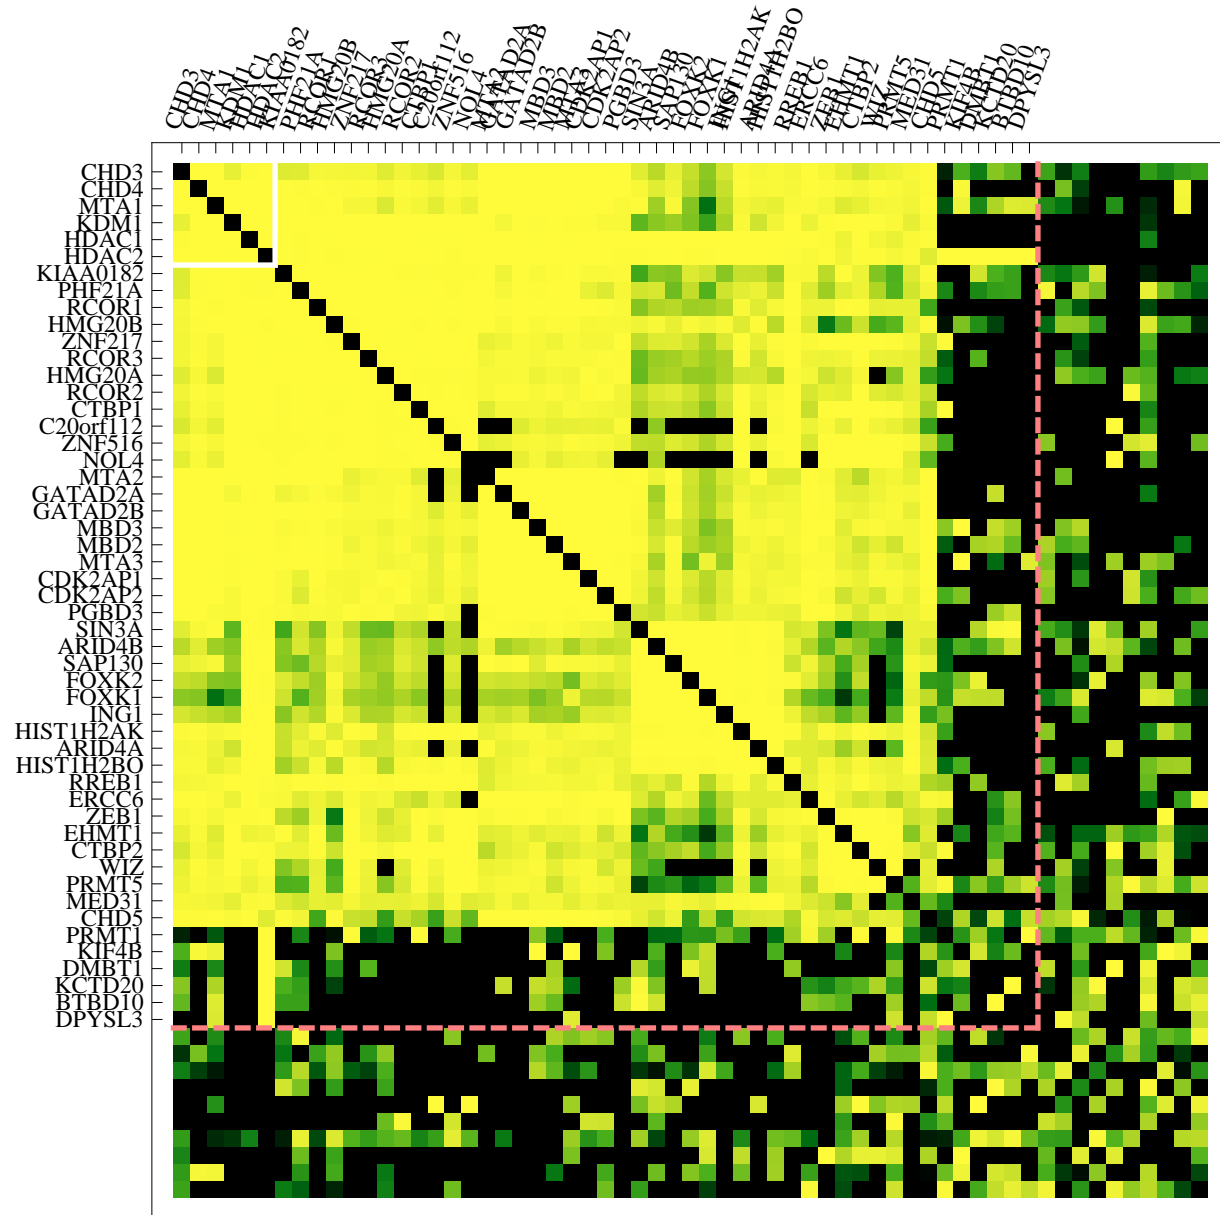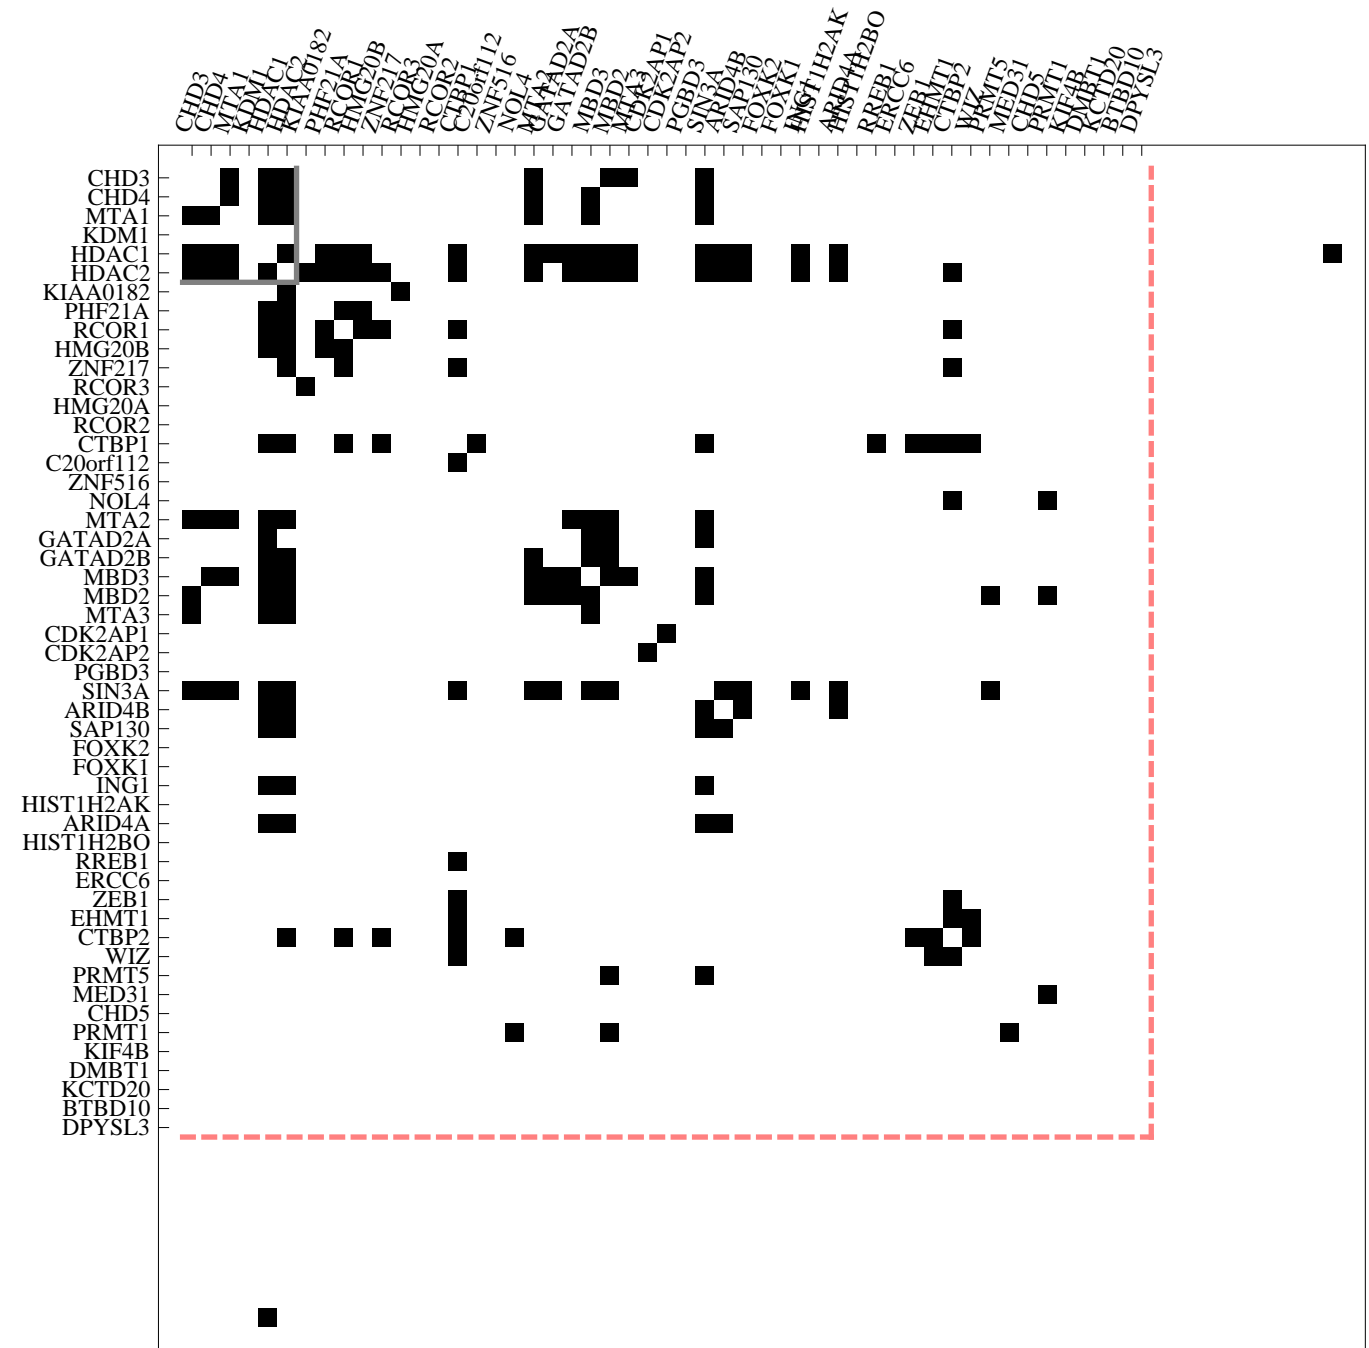

CoREST-HDAC complex

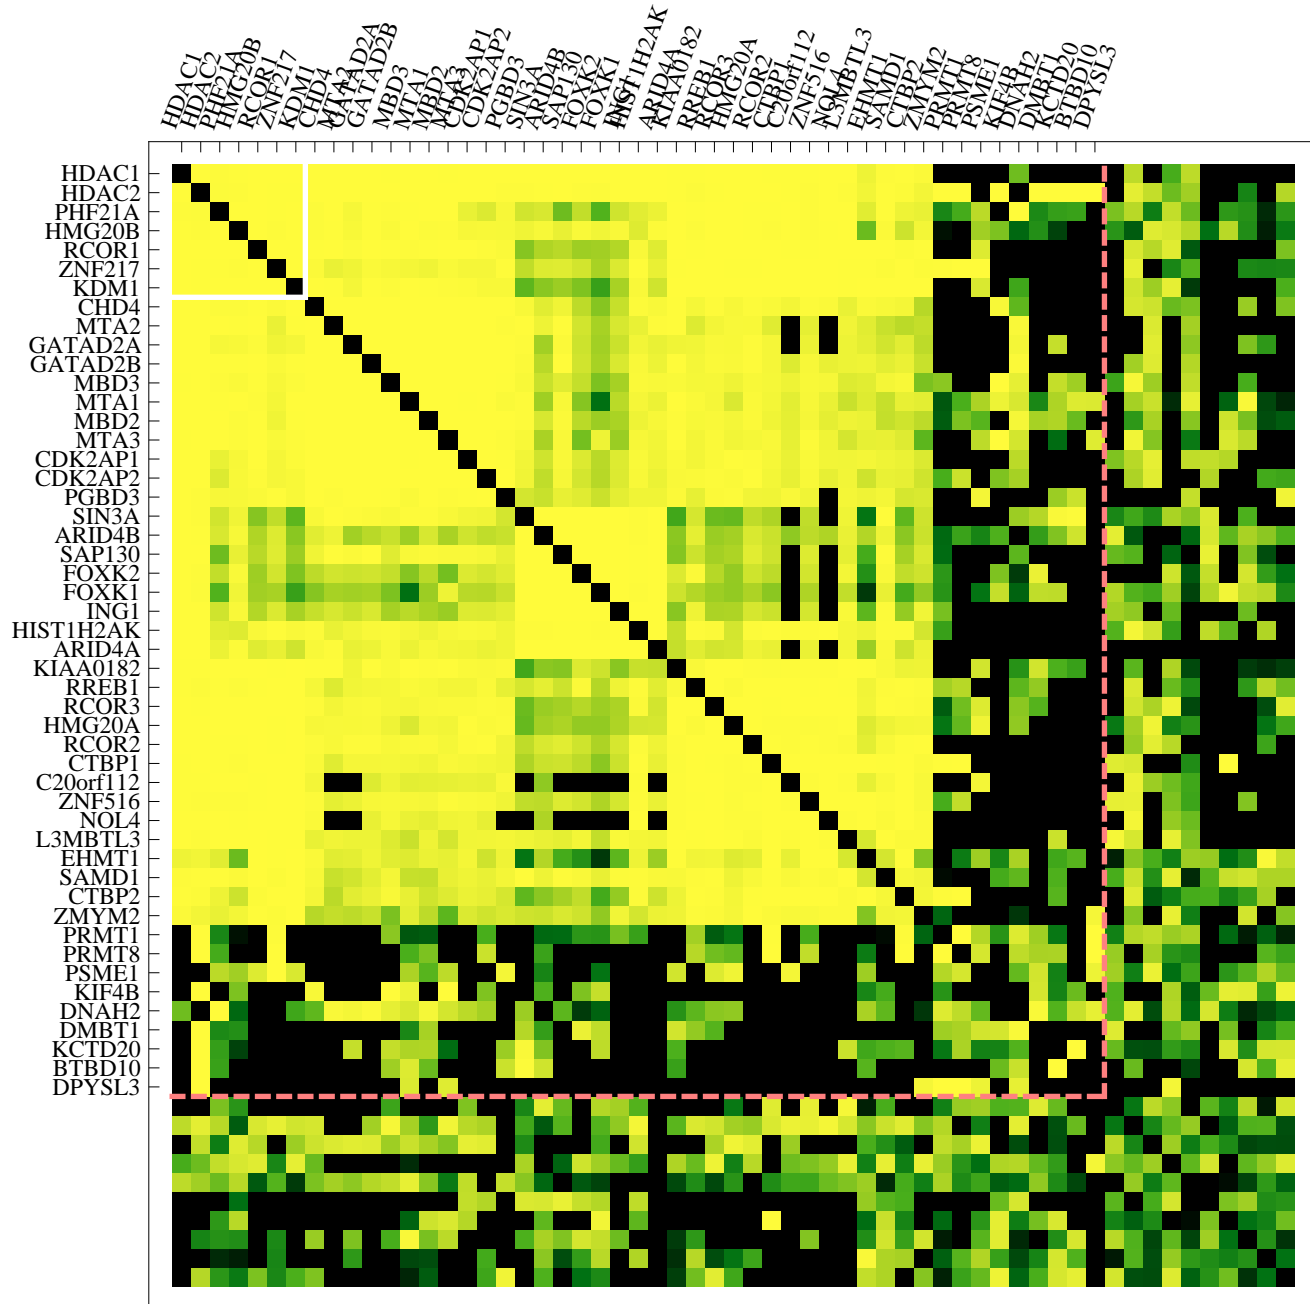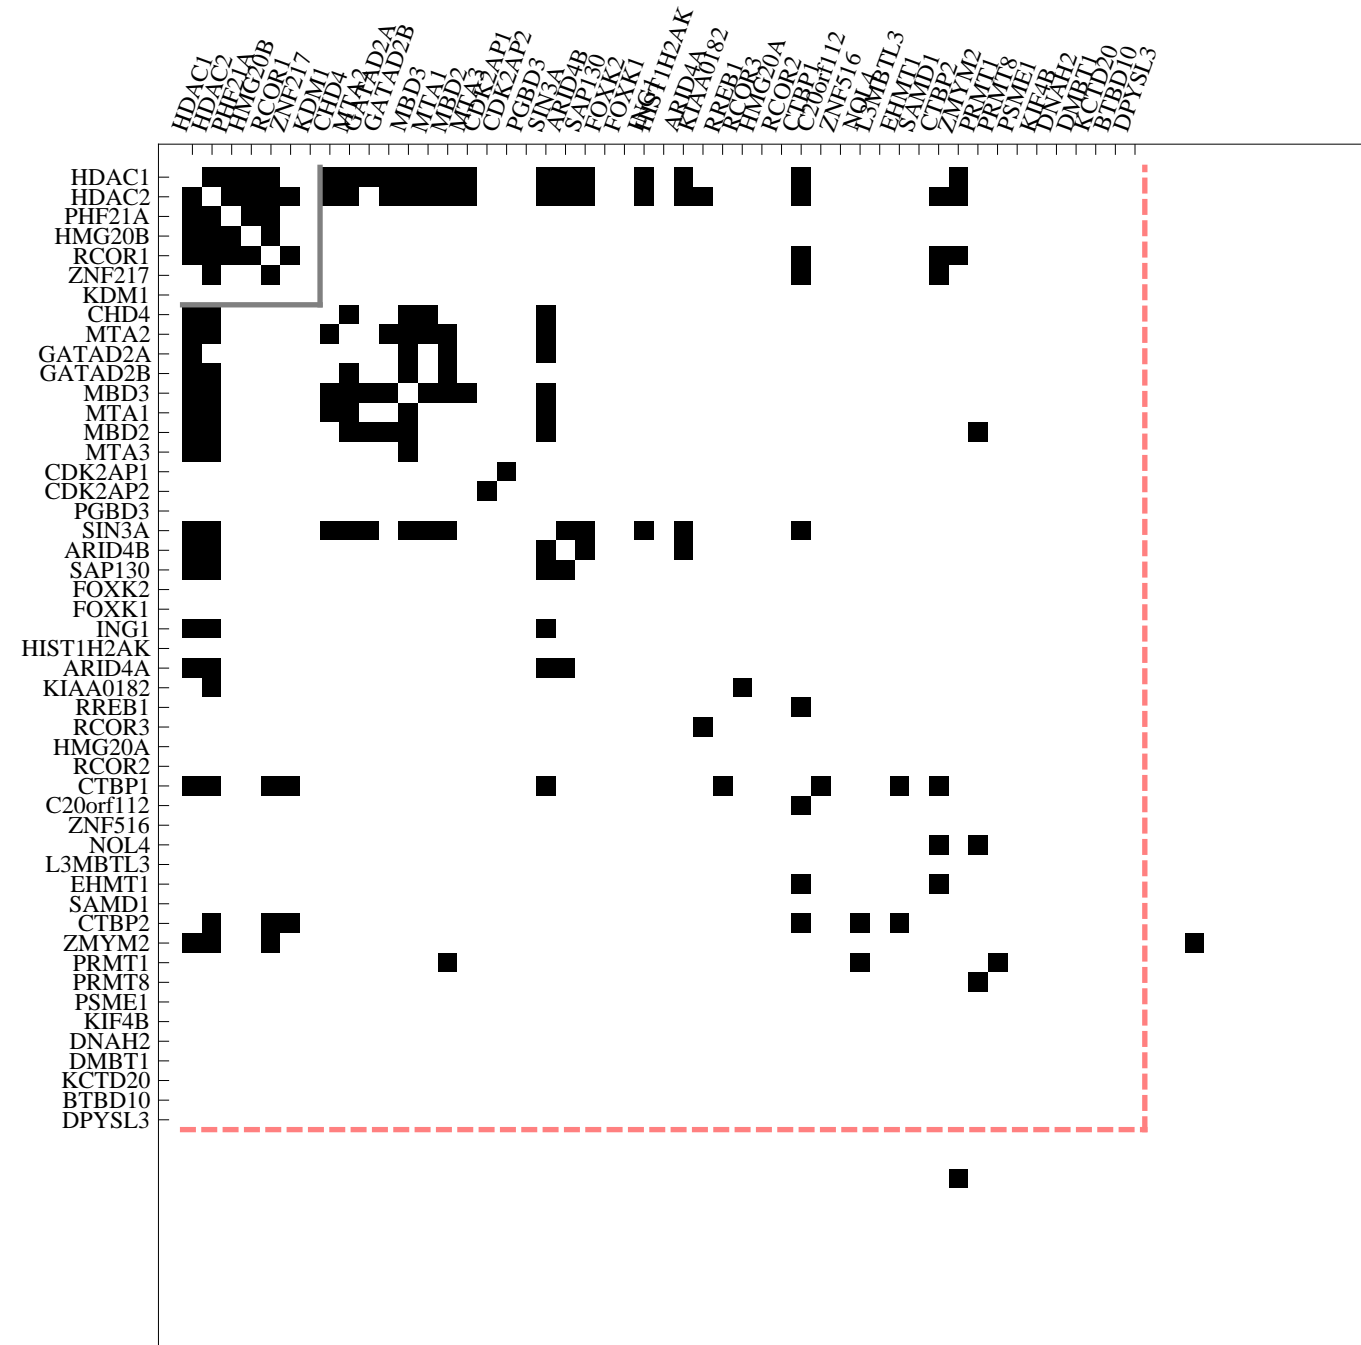

# LSD1 complex

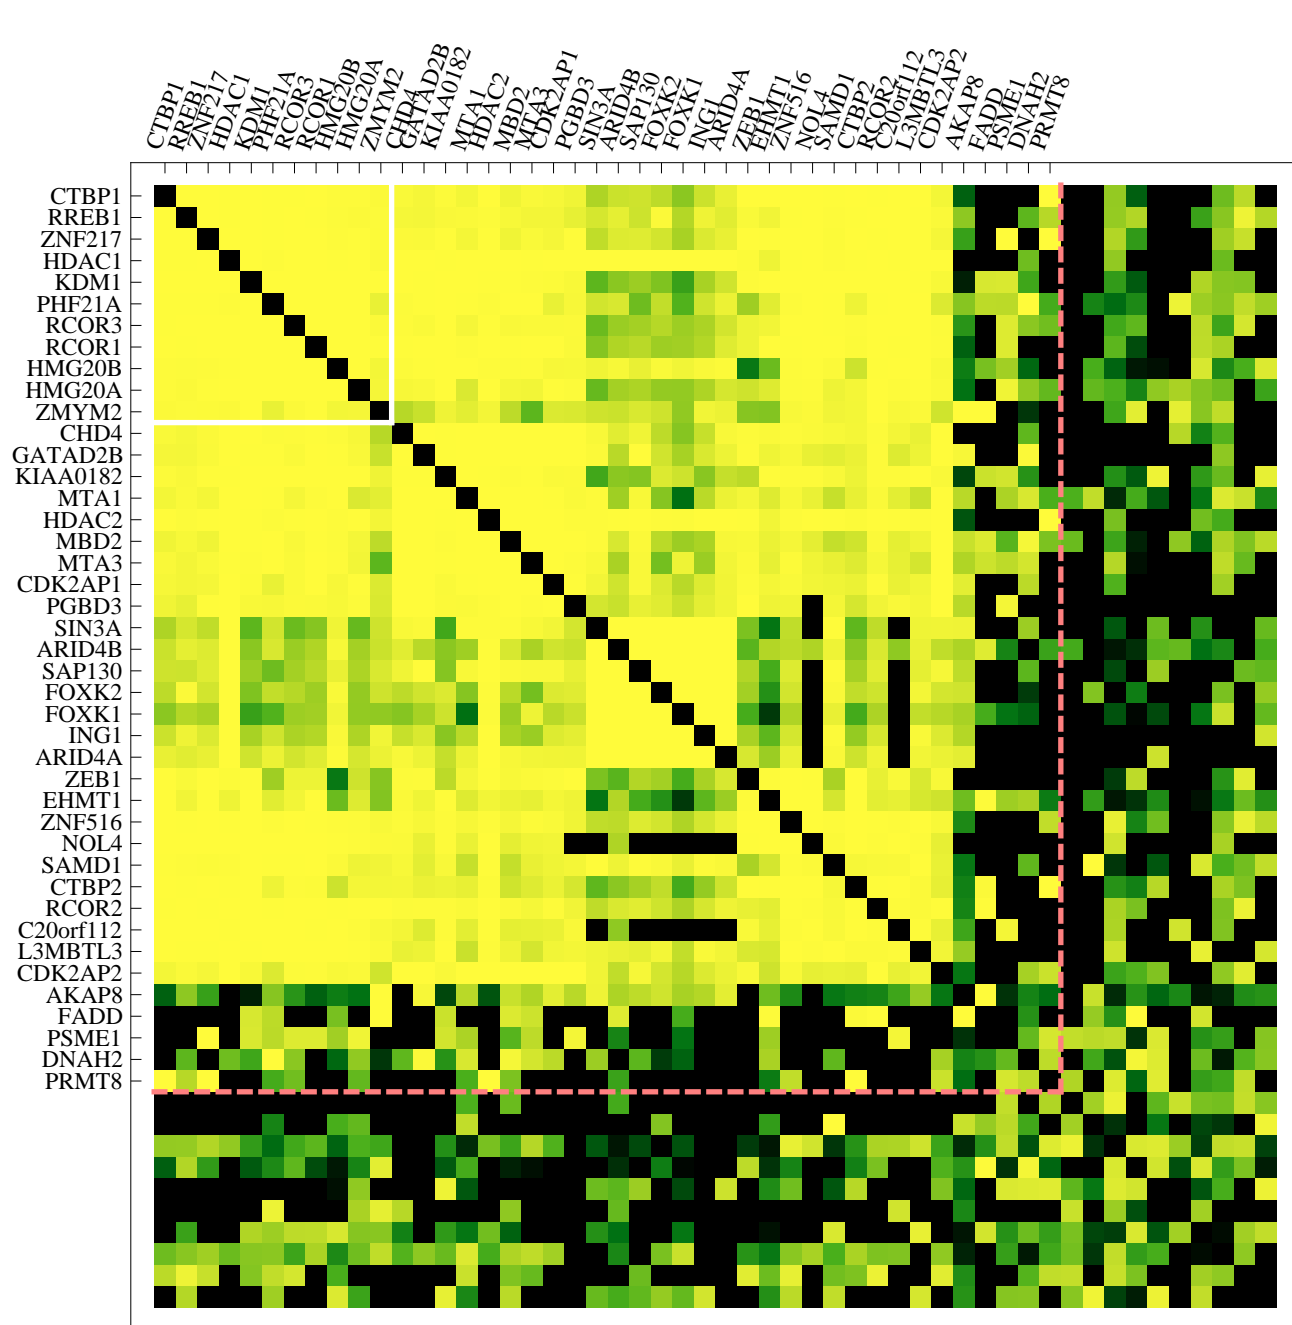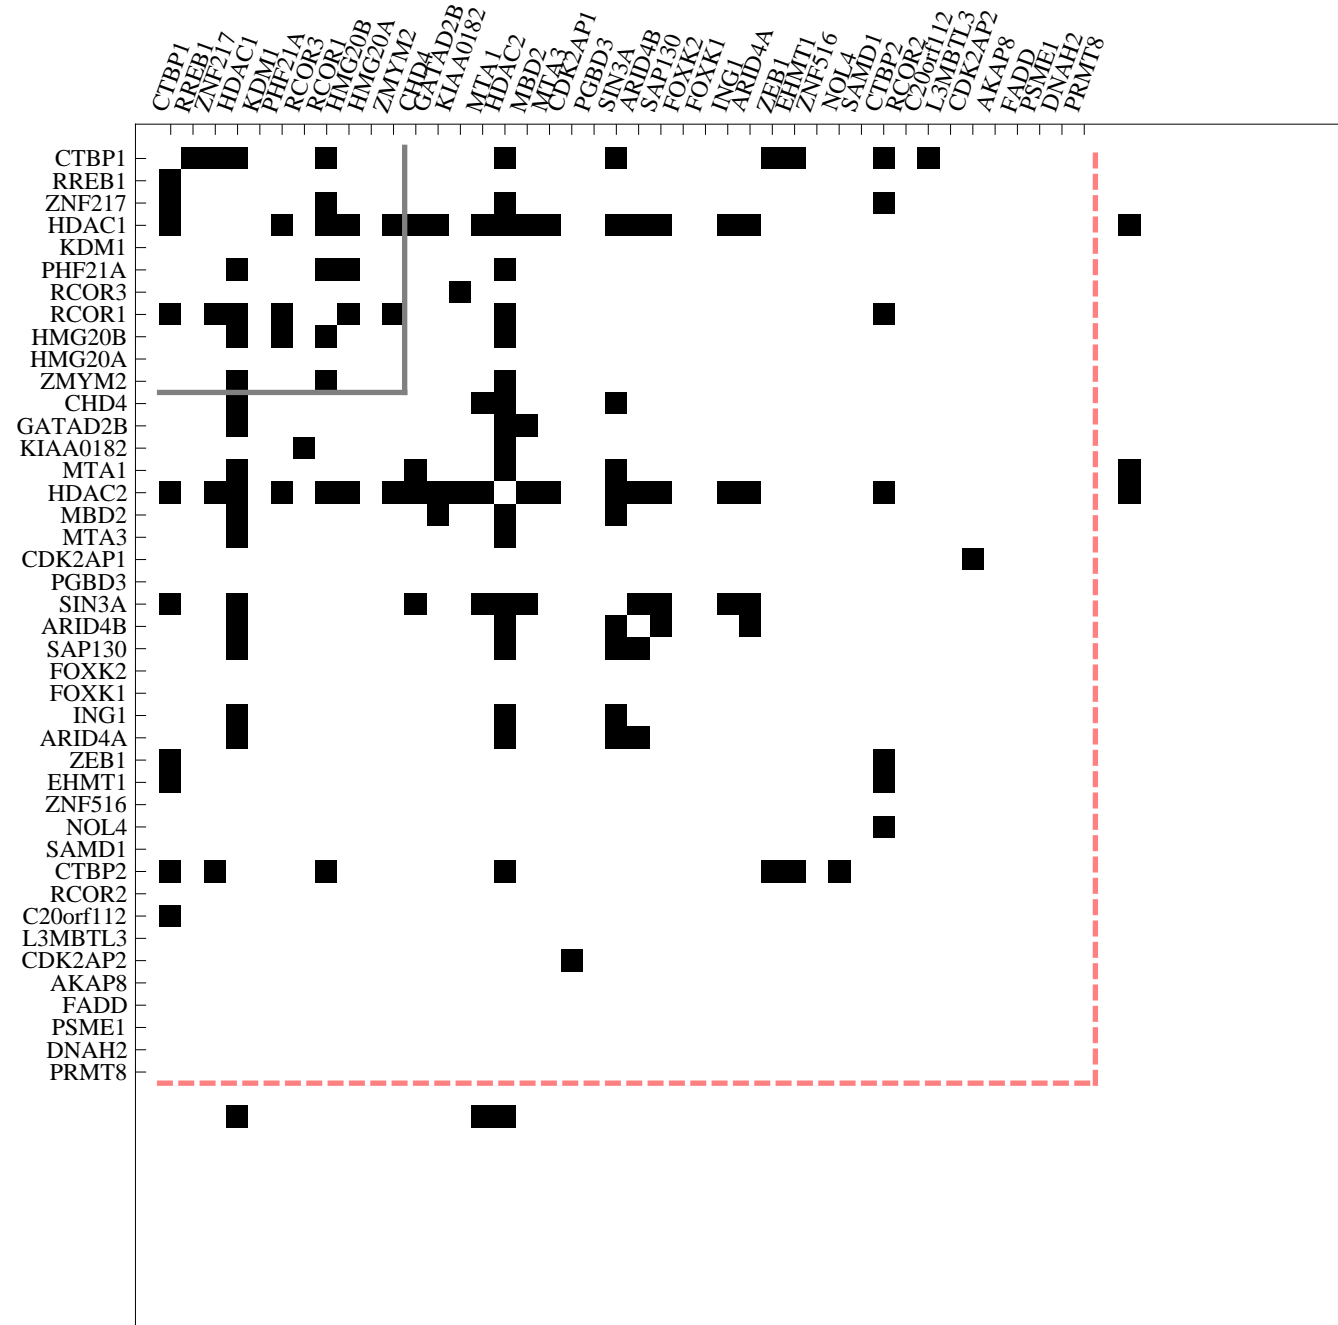

anti-BHC110 complex

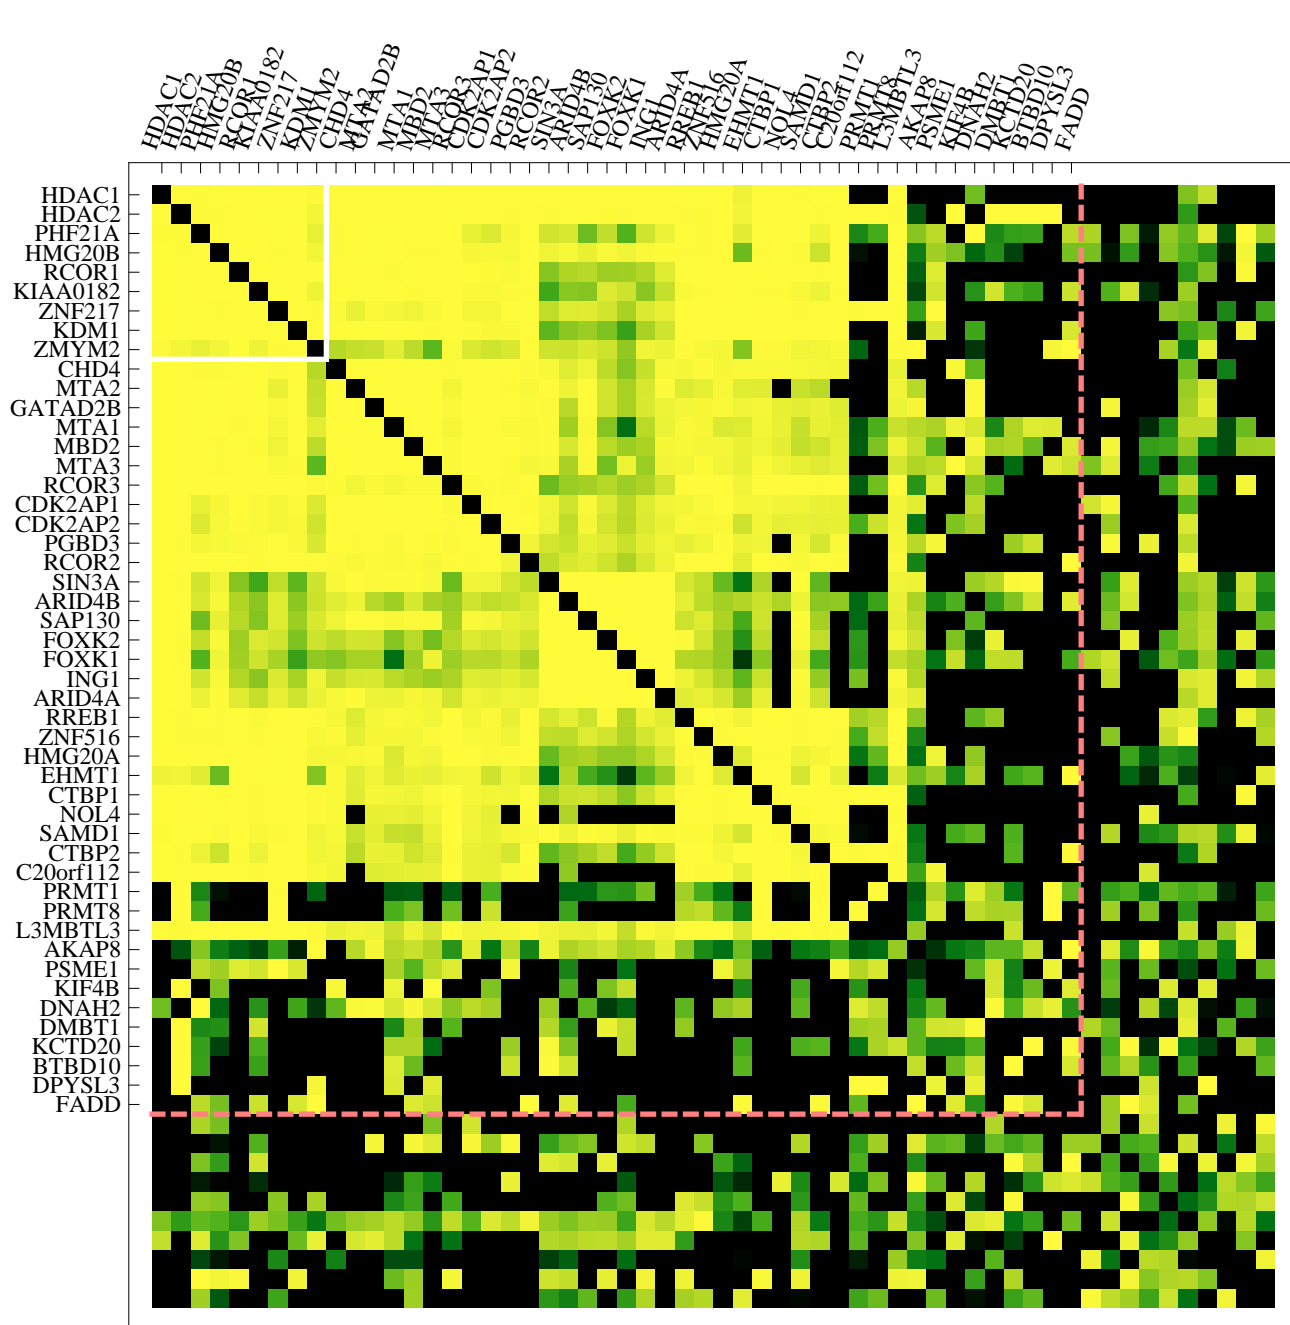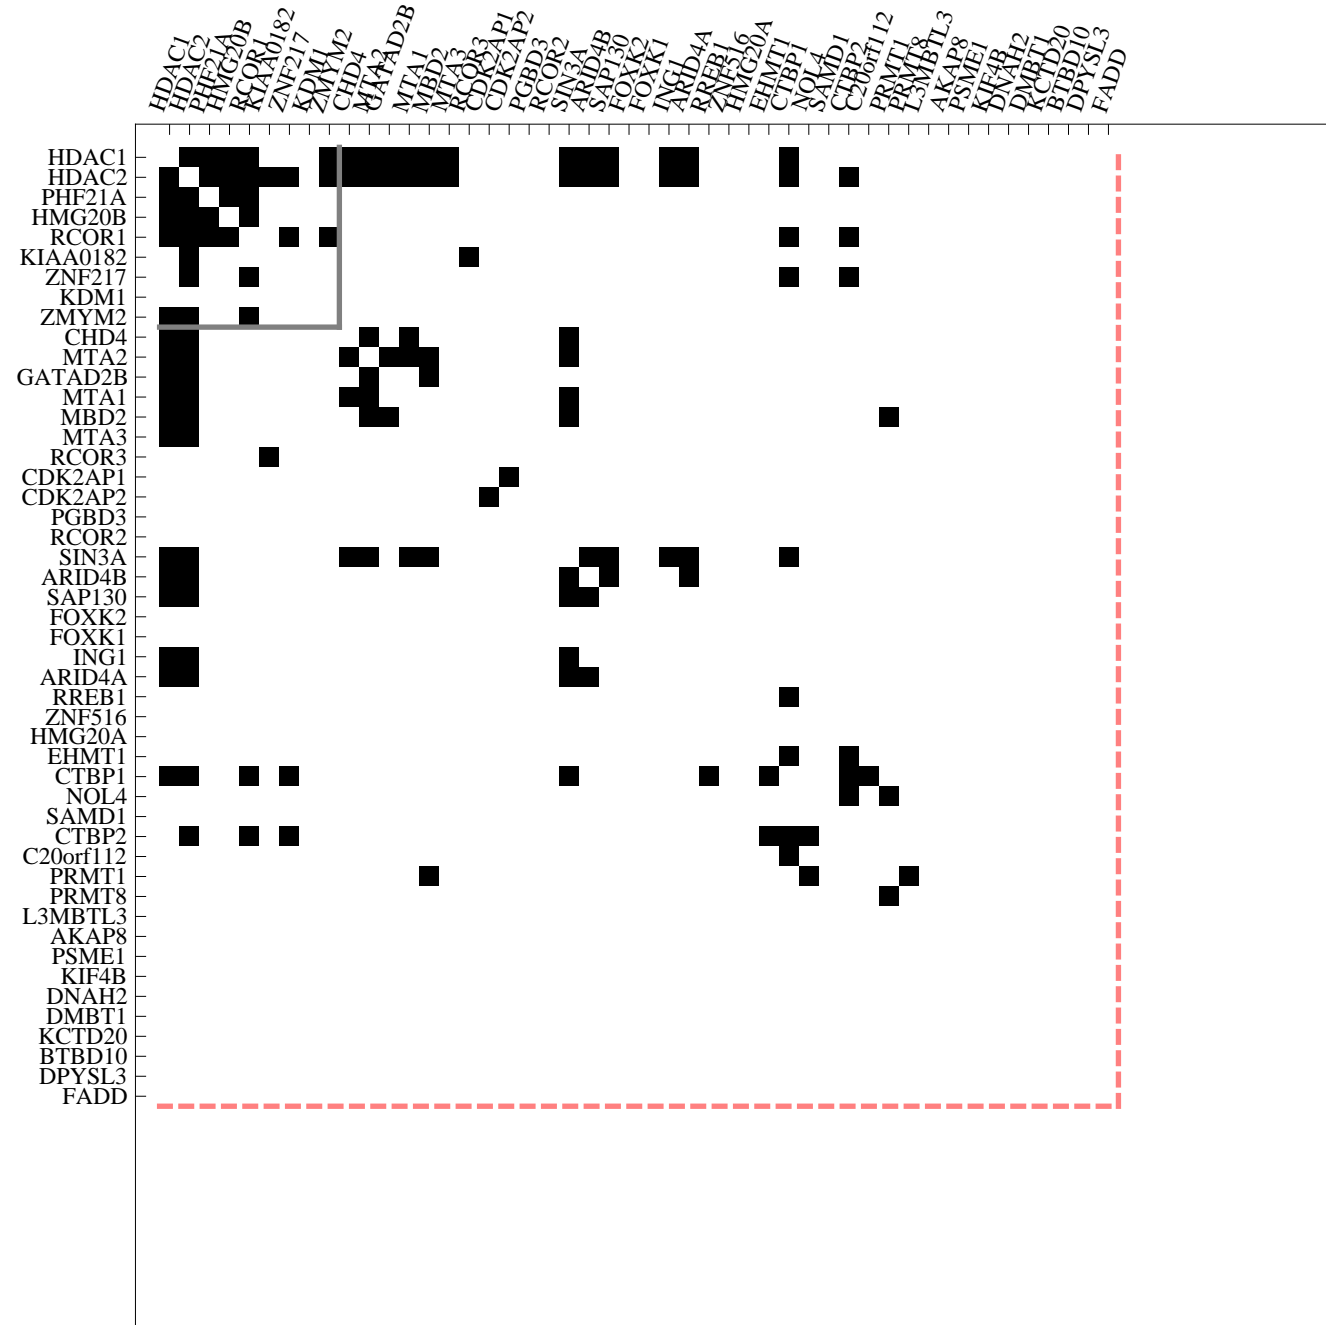

CtBP complex

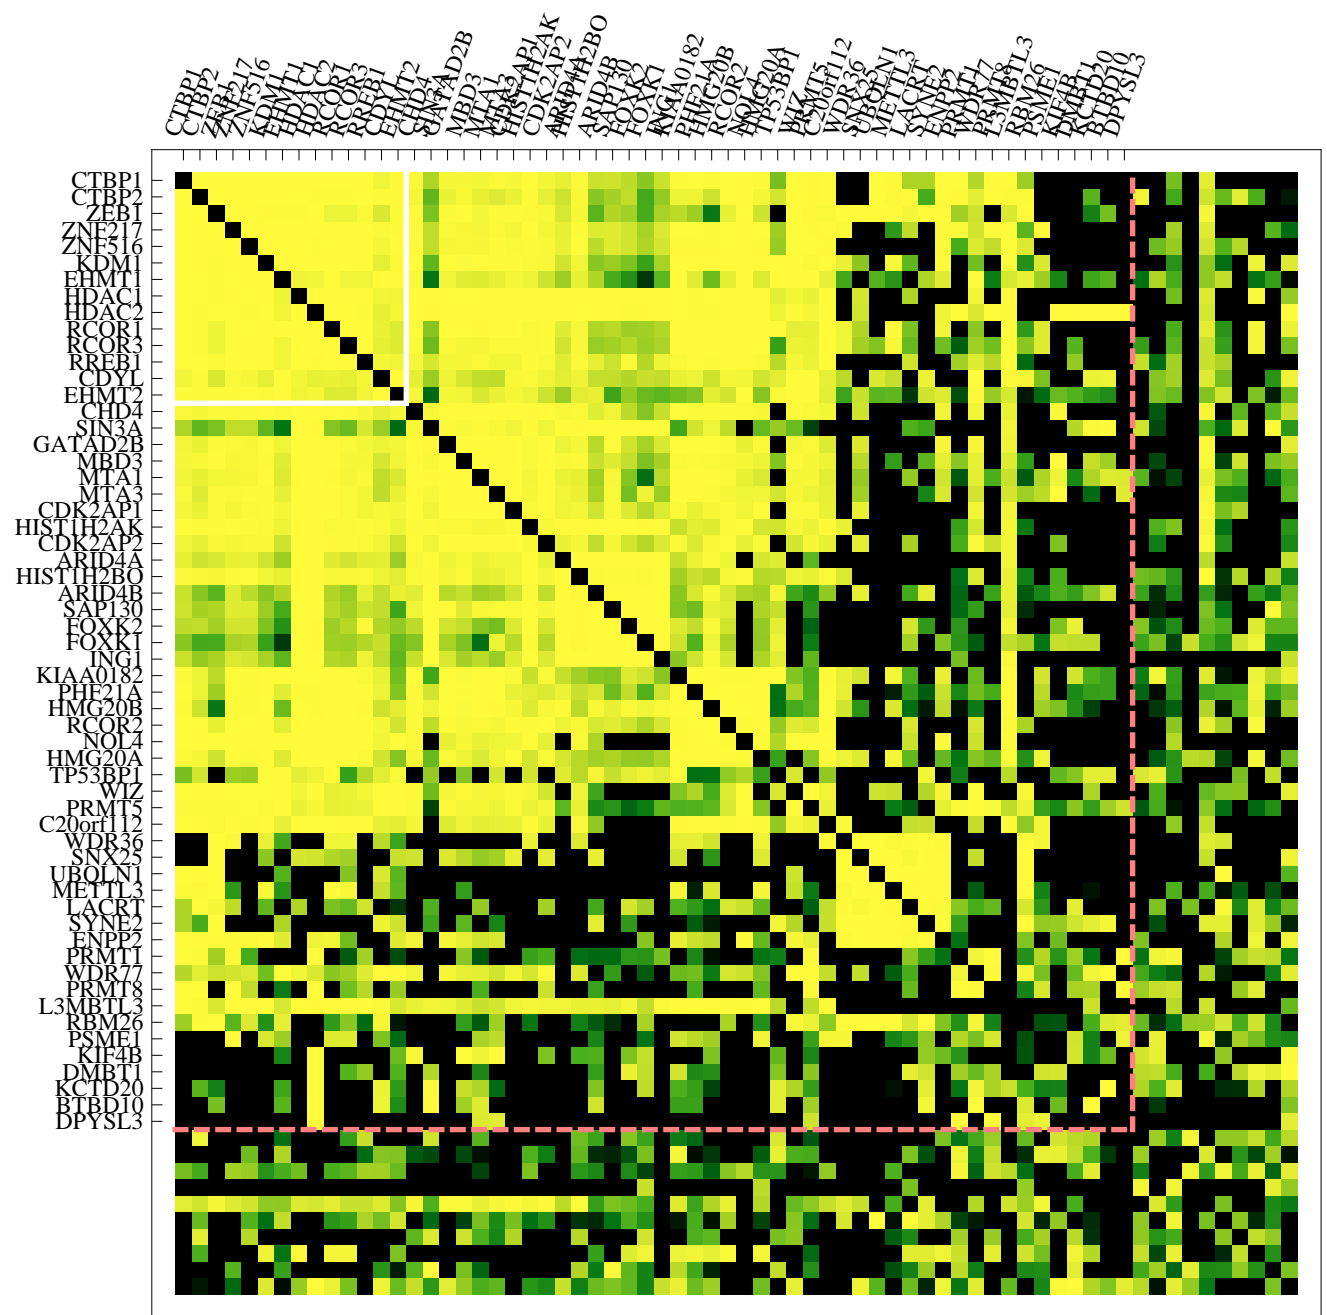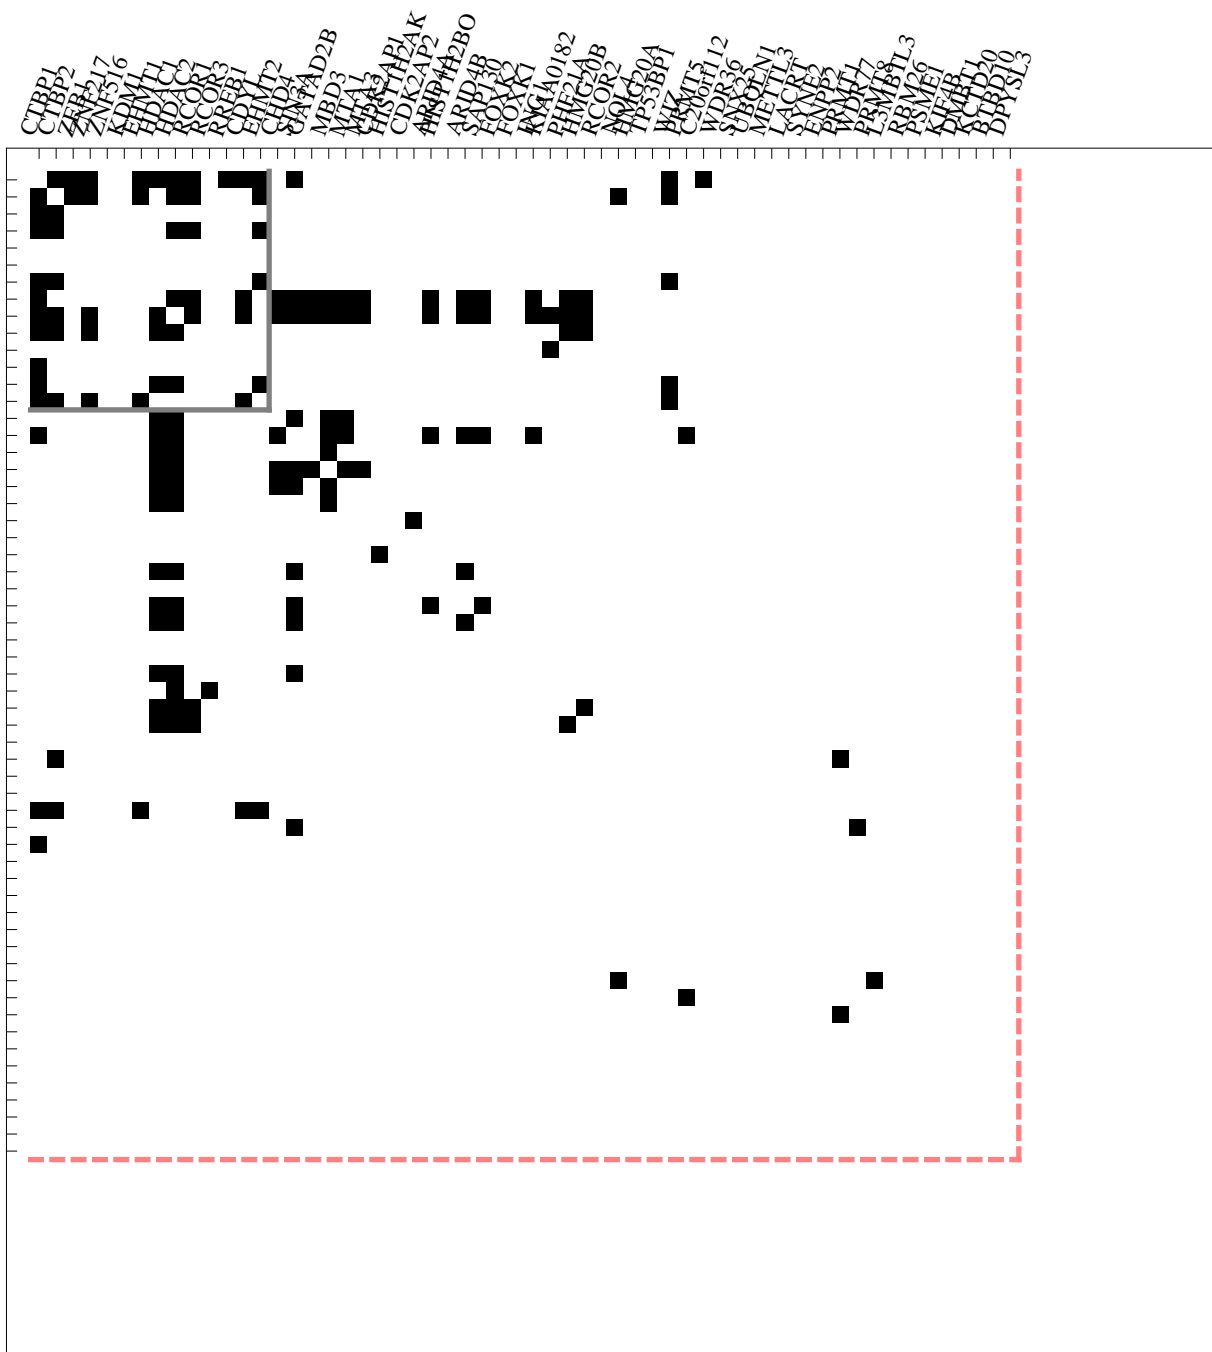



### CtBP core complex

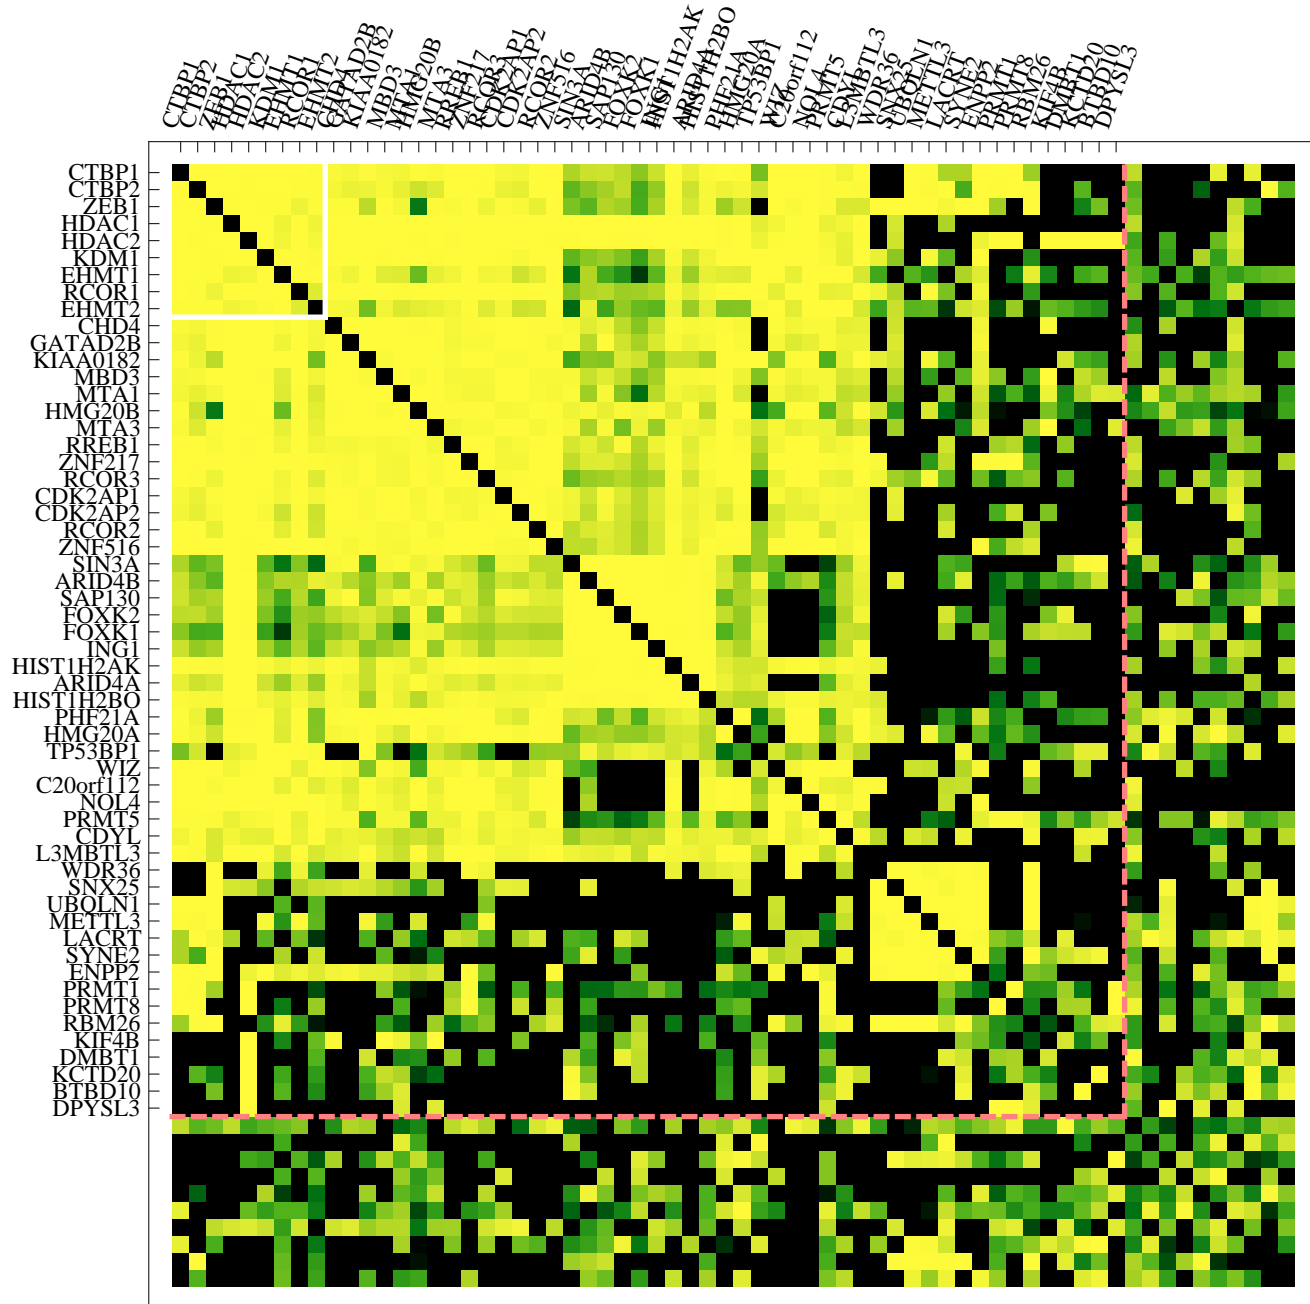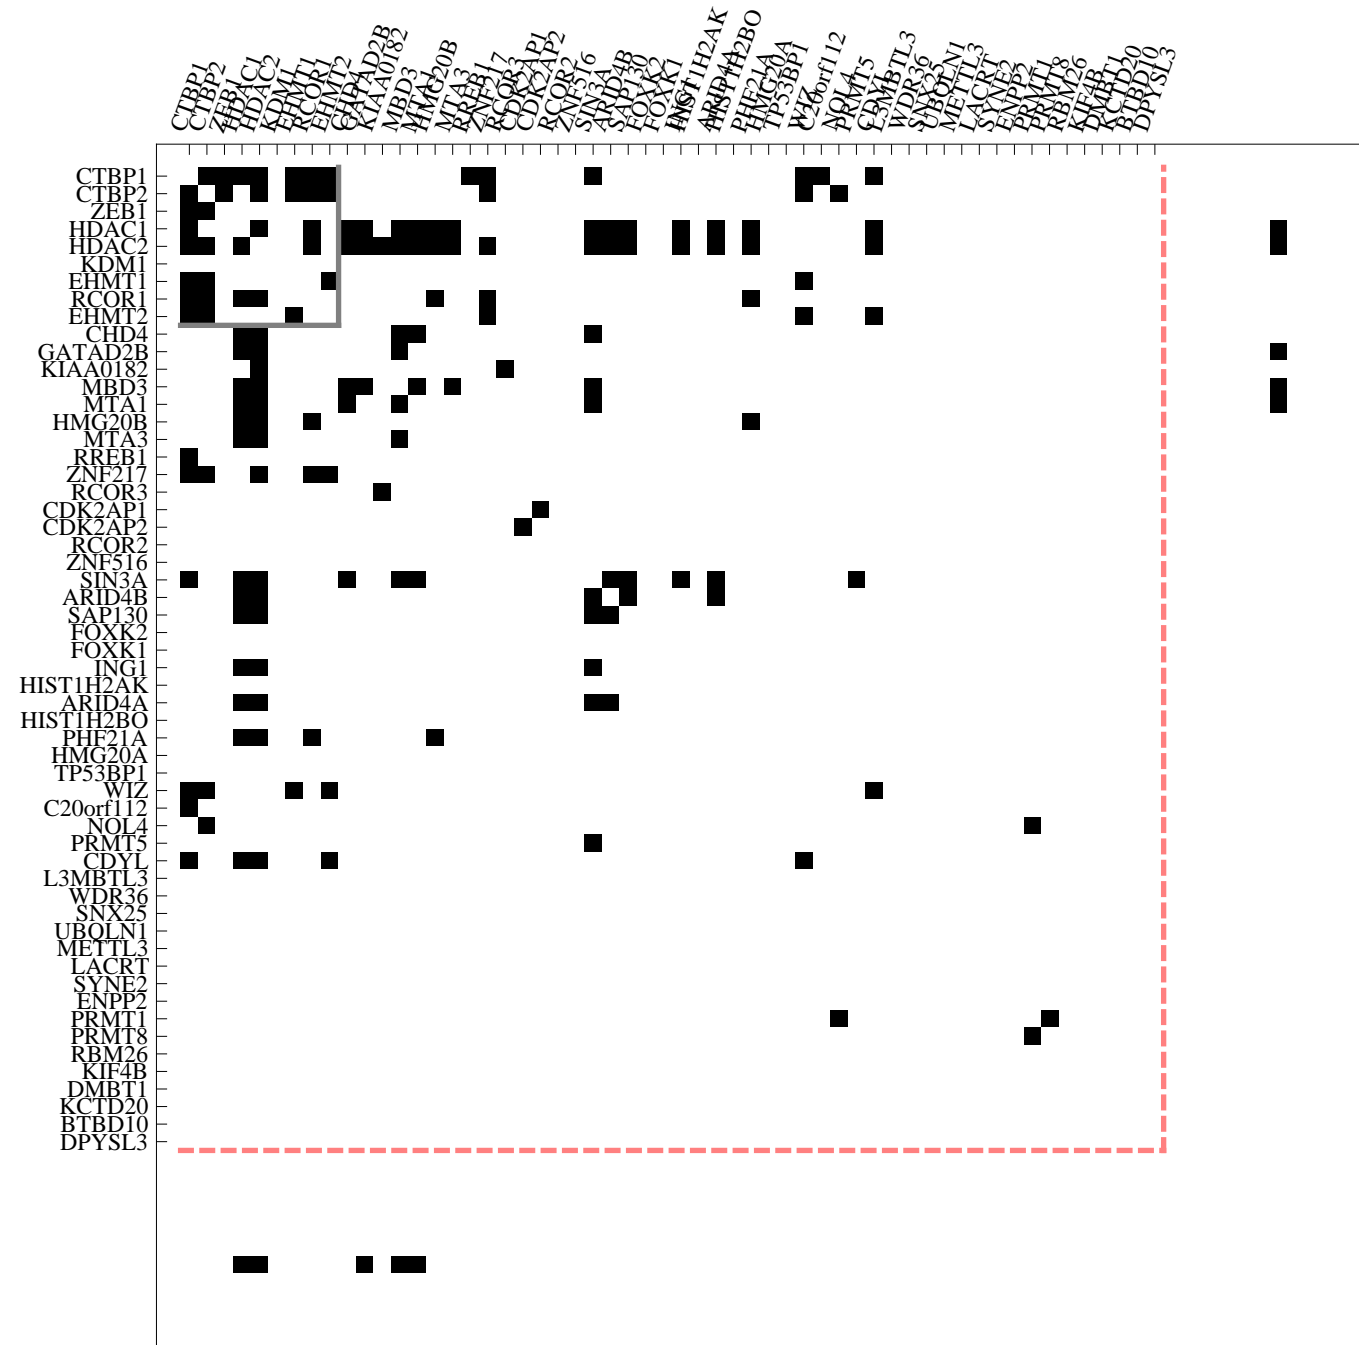

### BRG1-SIN3A complex

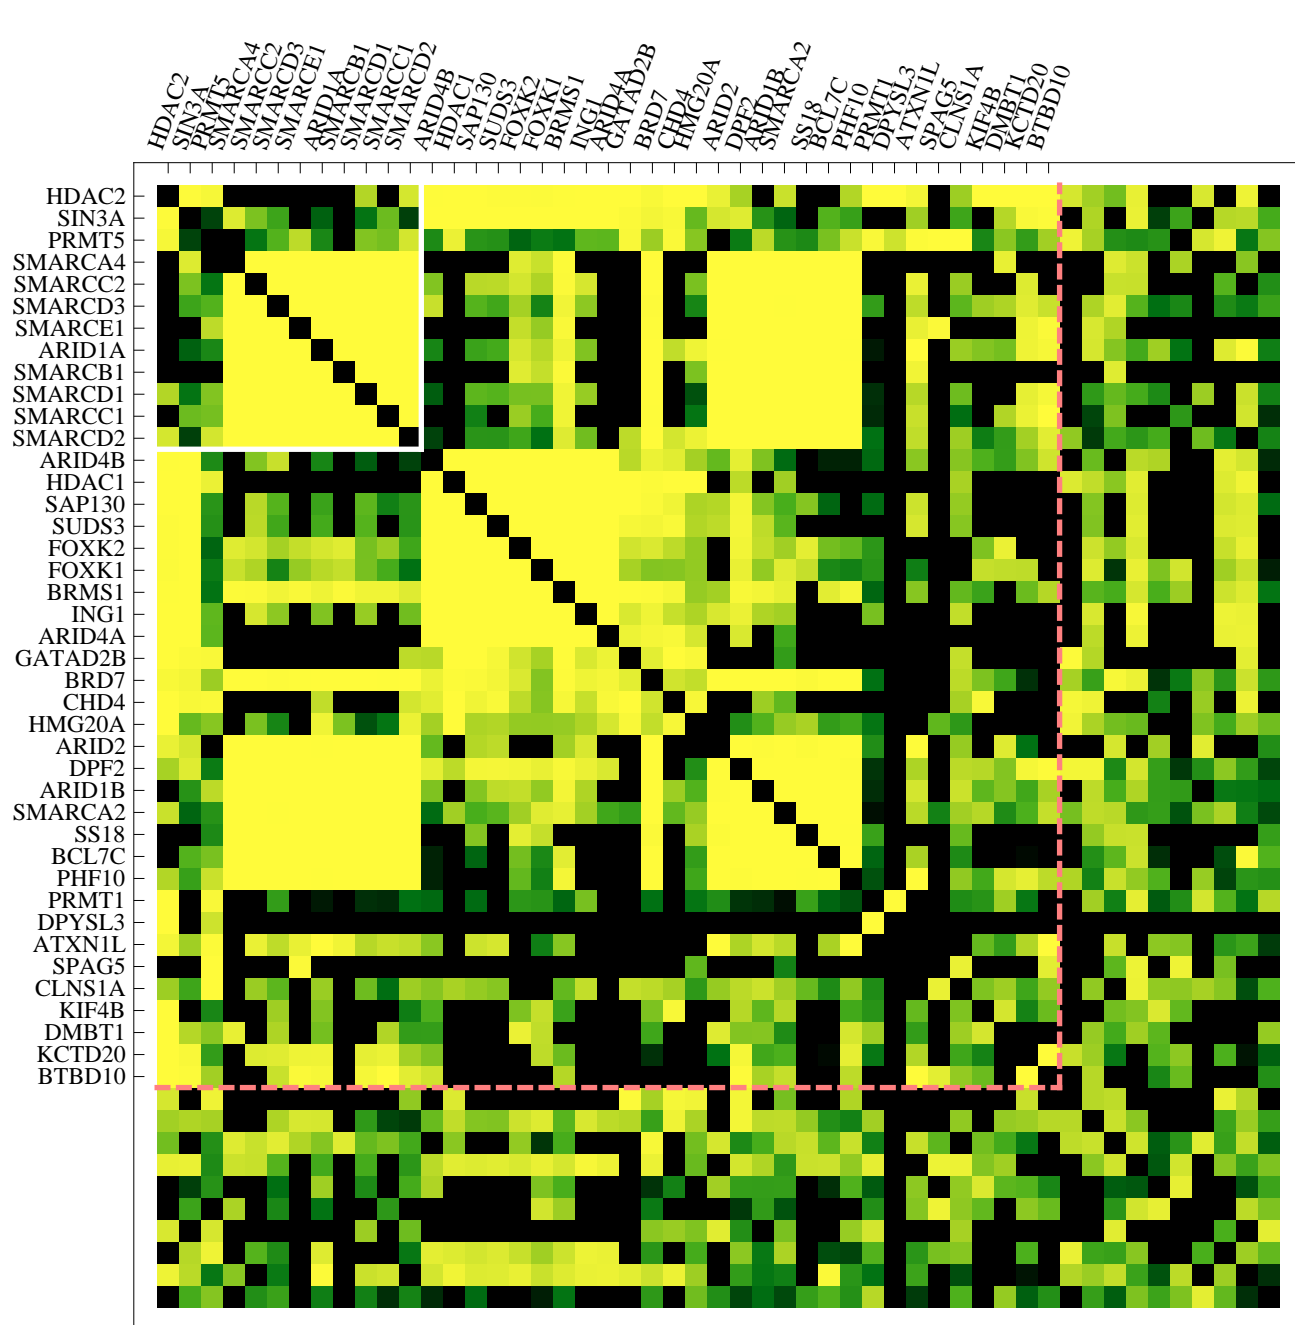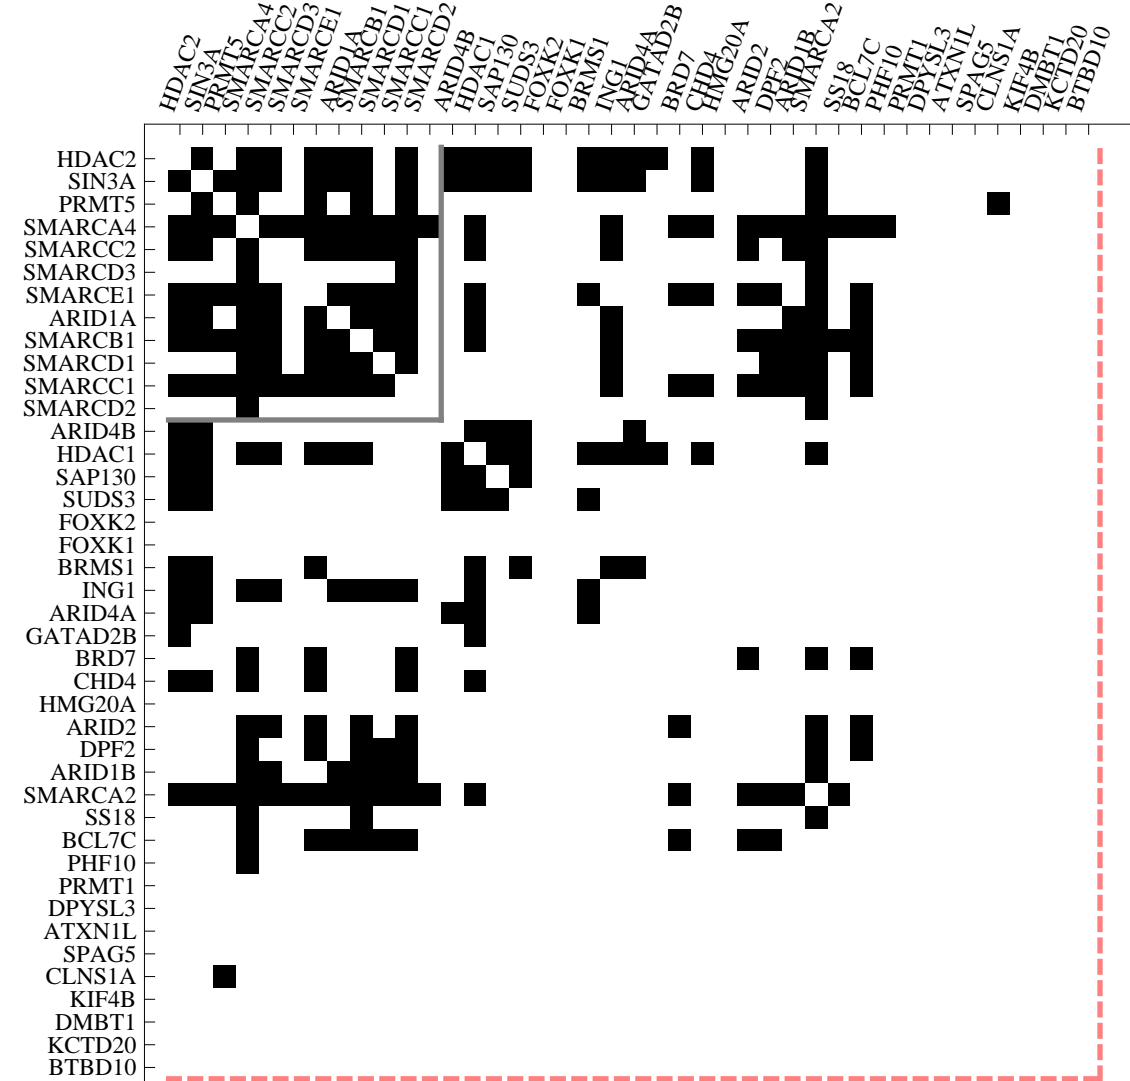



BRM-SIN3A complex

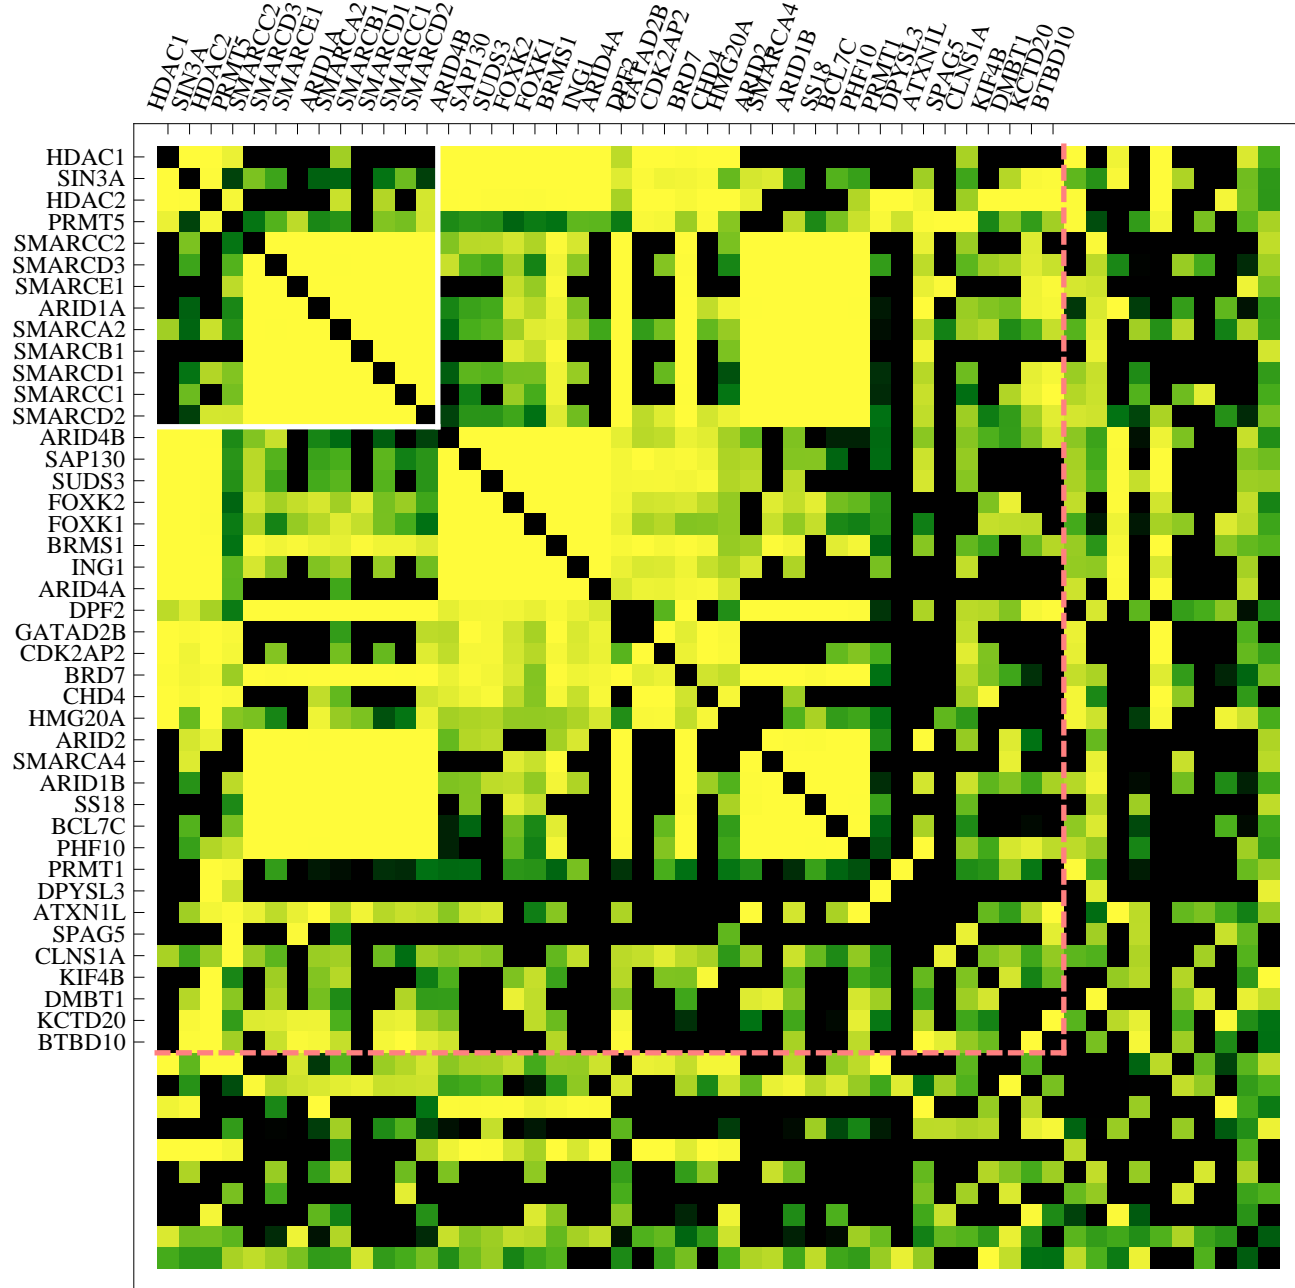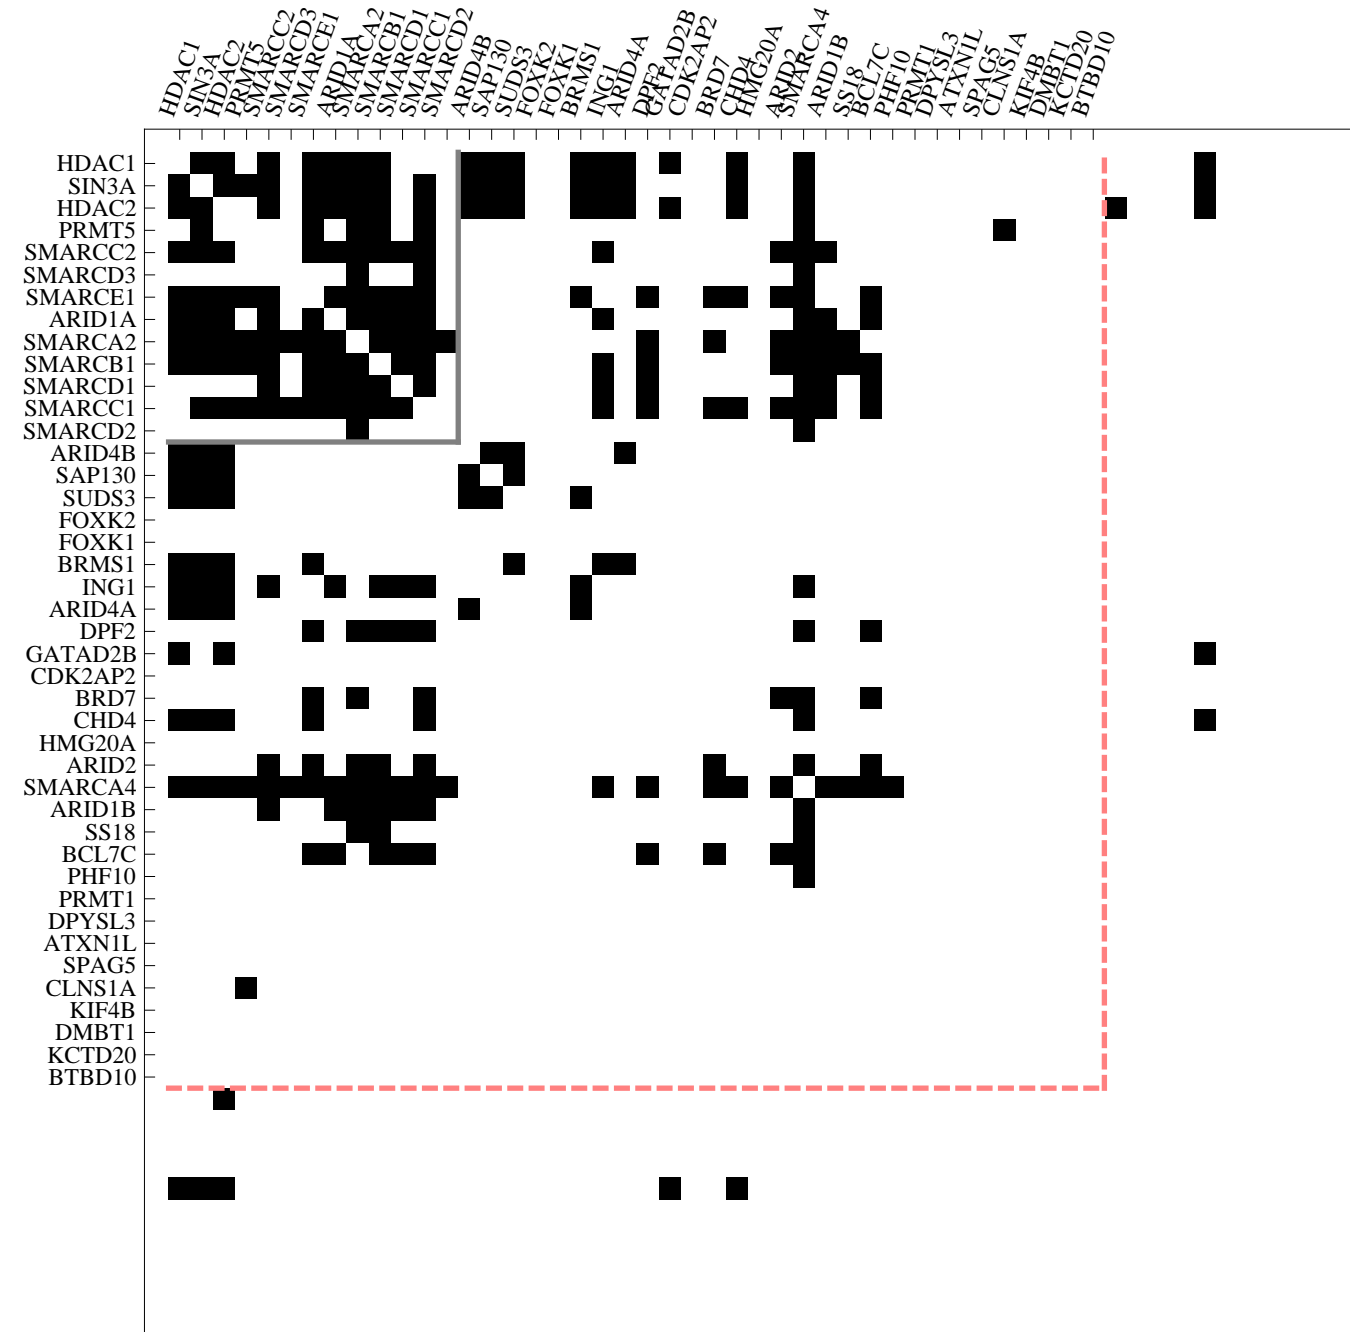



x (EIF3S6, EIF3S5, EIF3S4, EIF3S3, EIF3S6IP, EIF3S2, EIF3S9, EIF3S12, EIF3S10, EIF3S11)

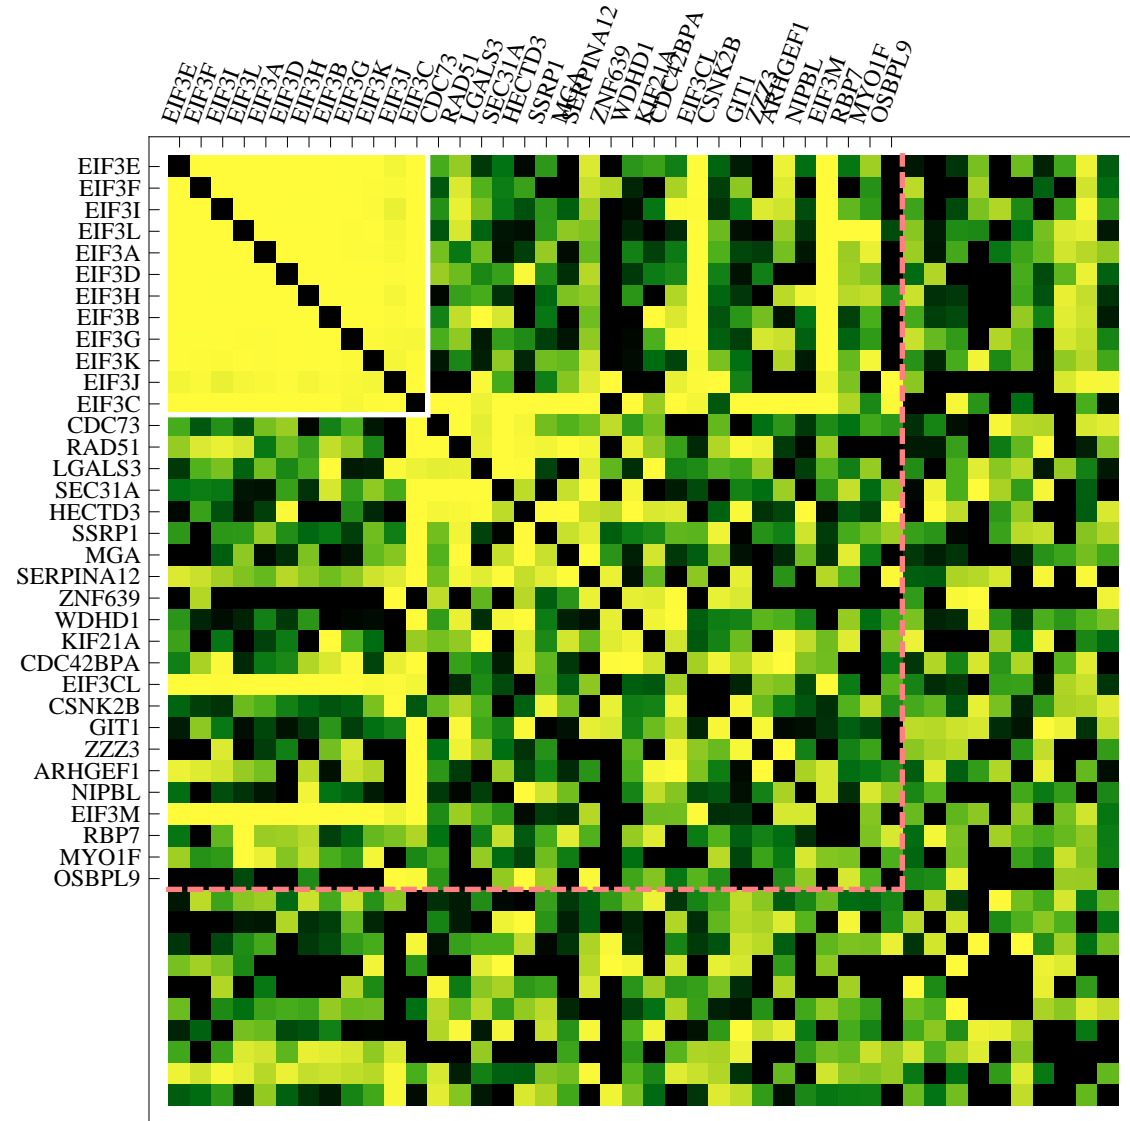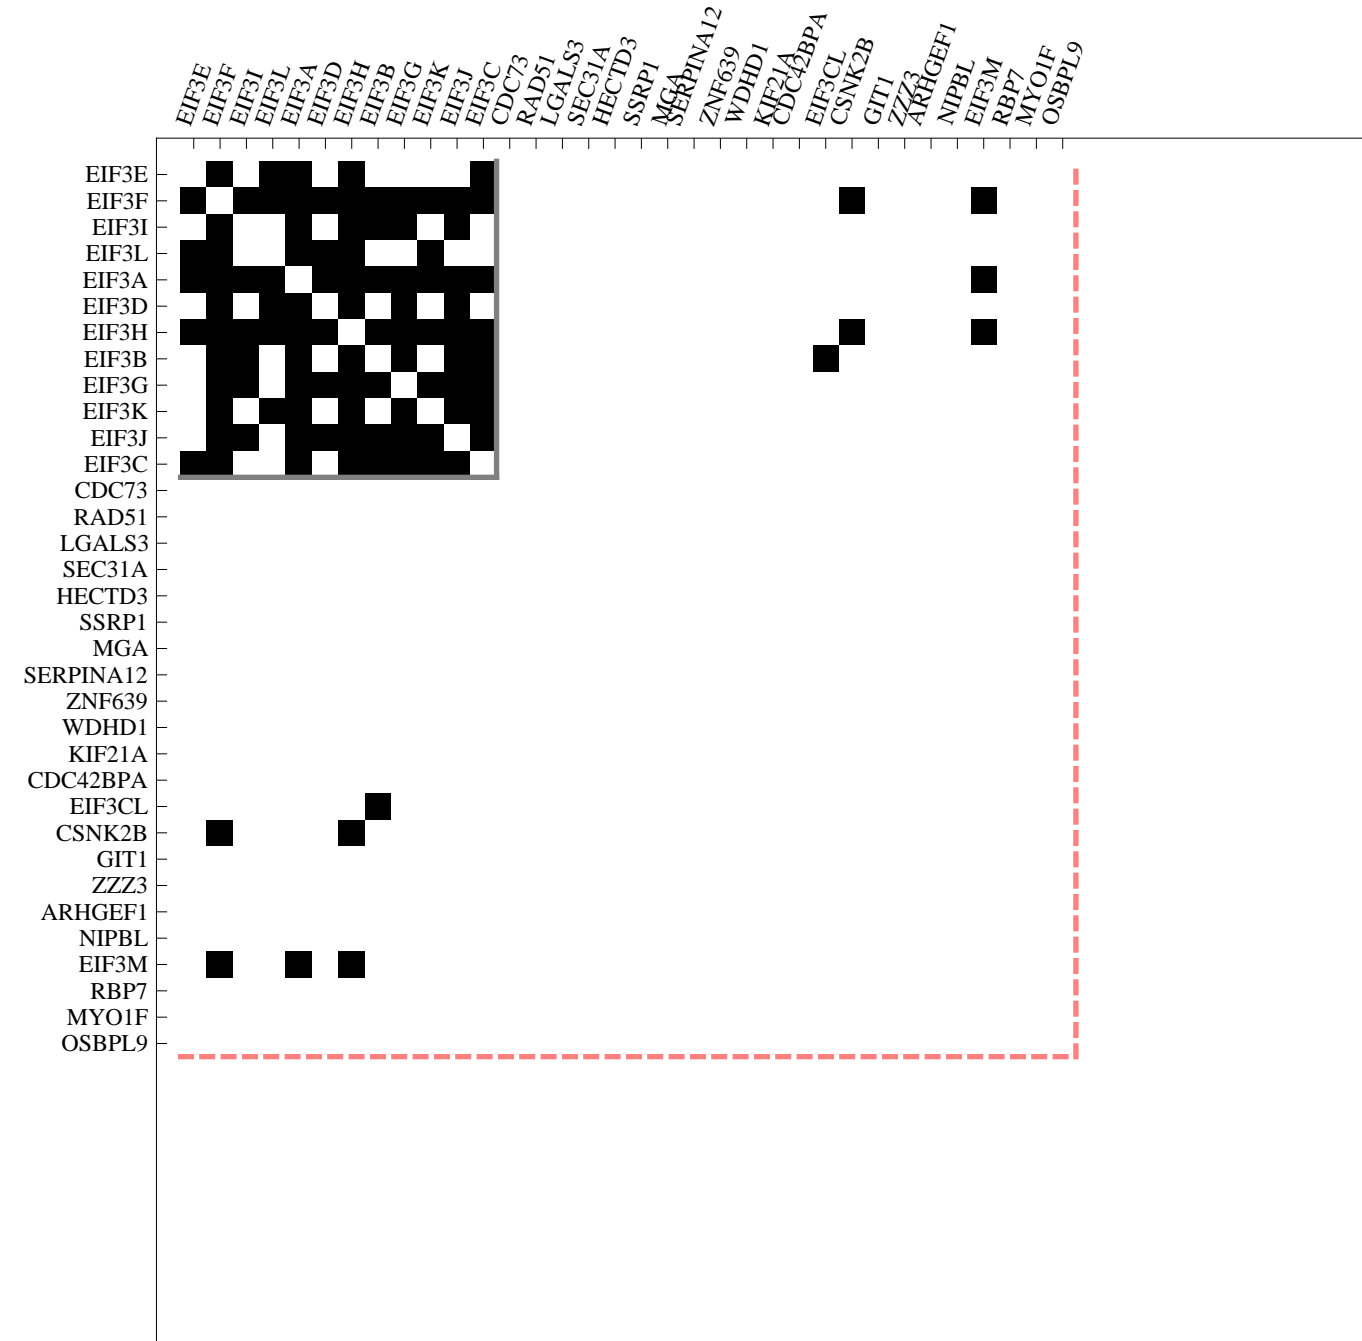

LARC complex (LCR-associated remodeling complex)

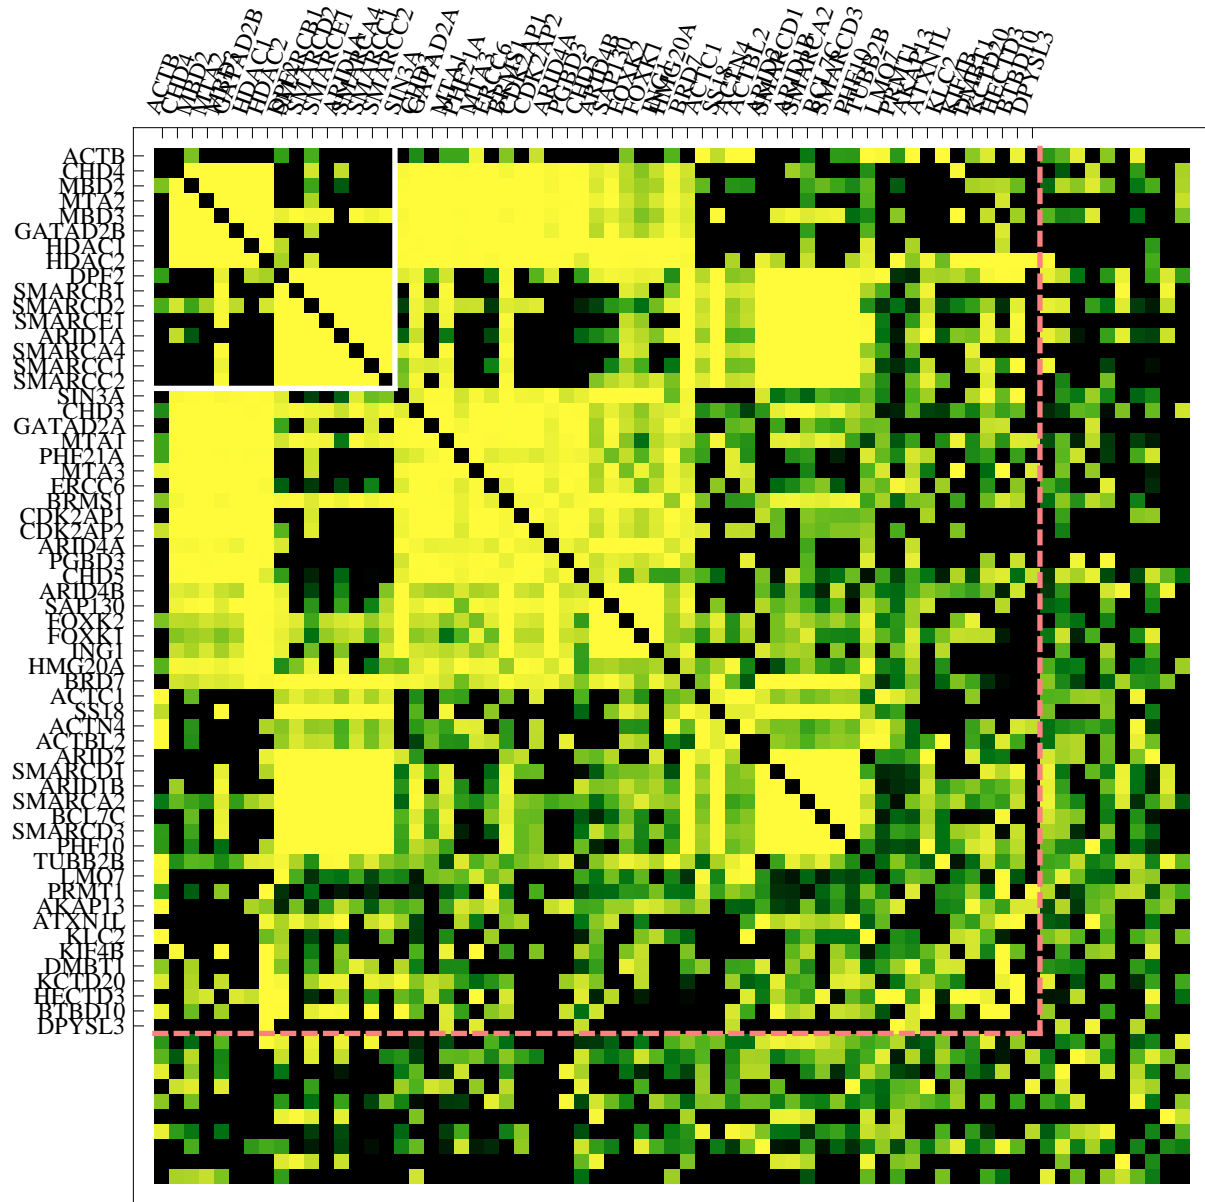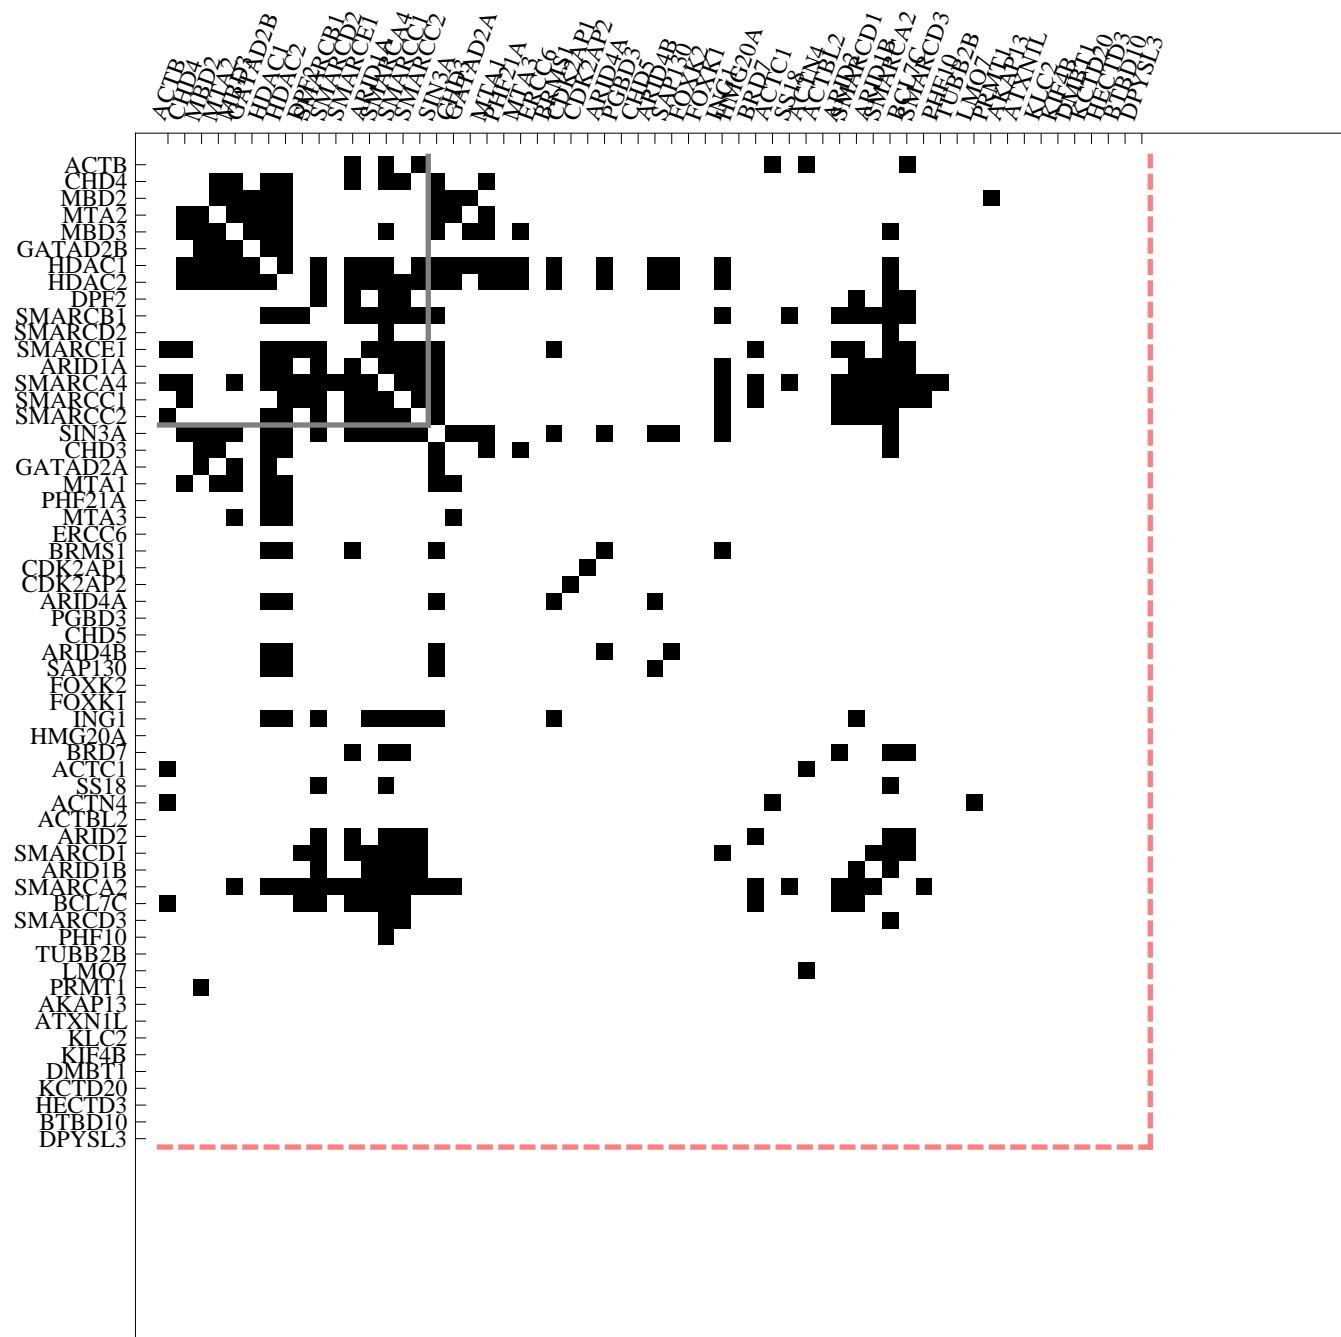

BRG1–SIN3A–HDAC containing SWI/SNF remodeling complex I

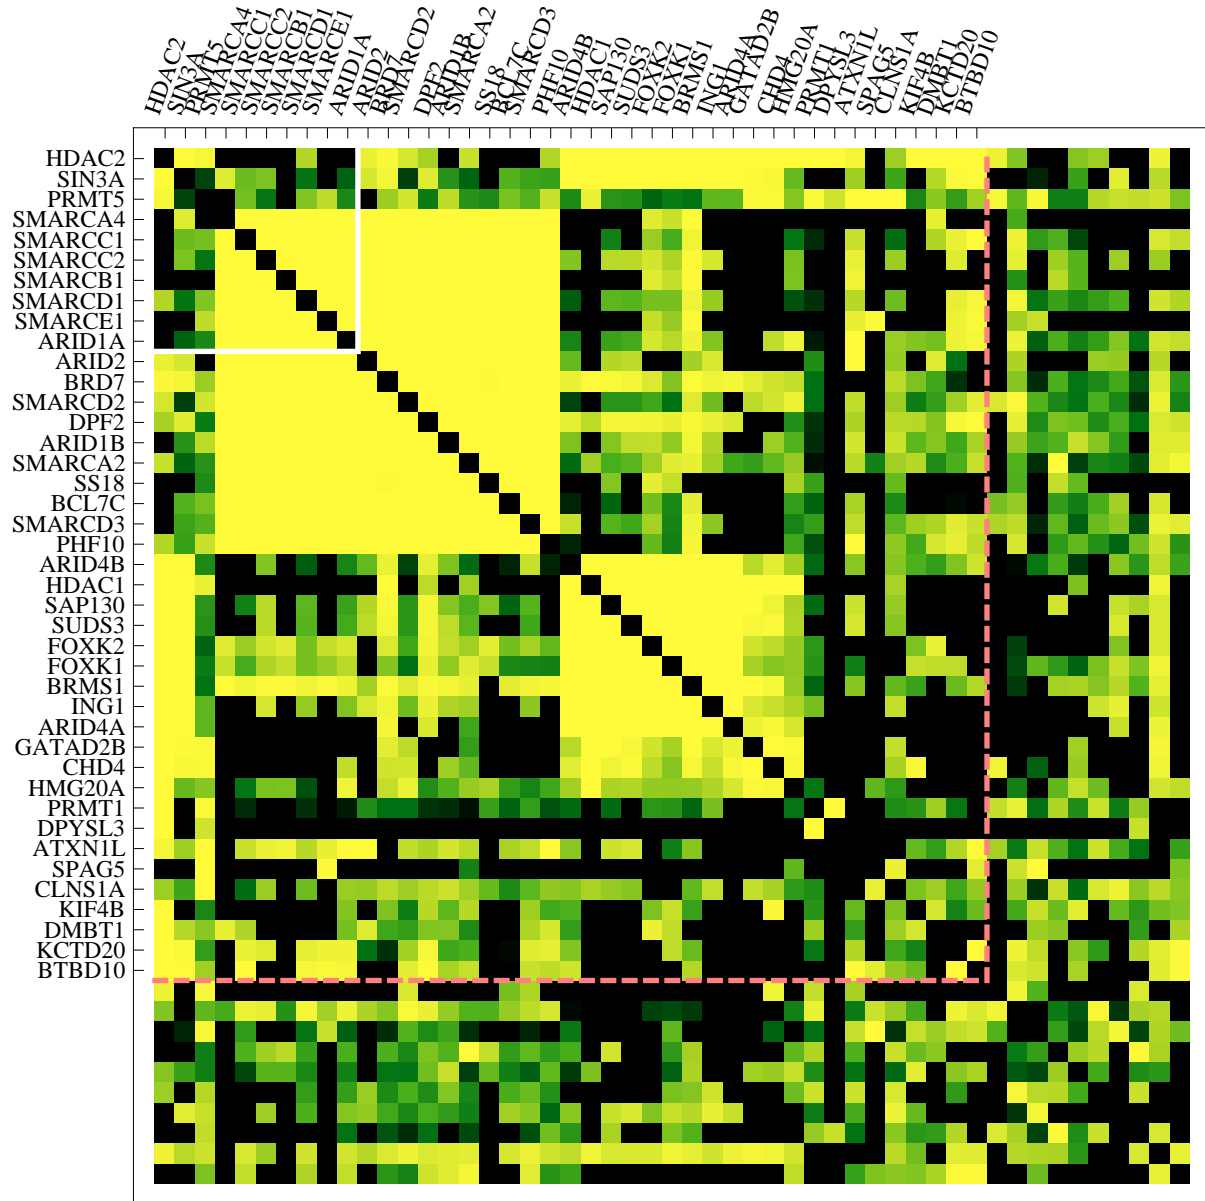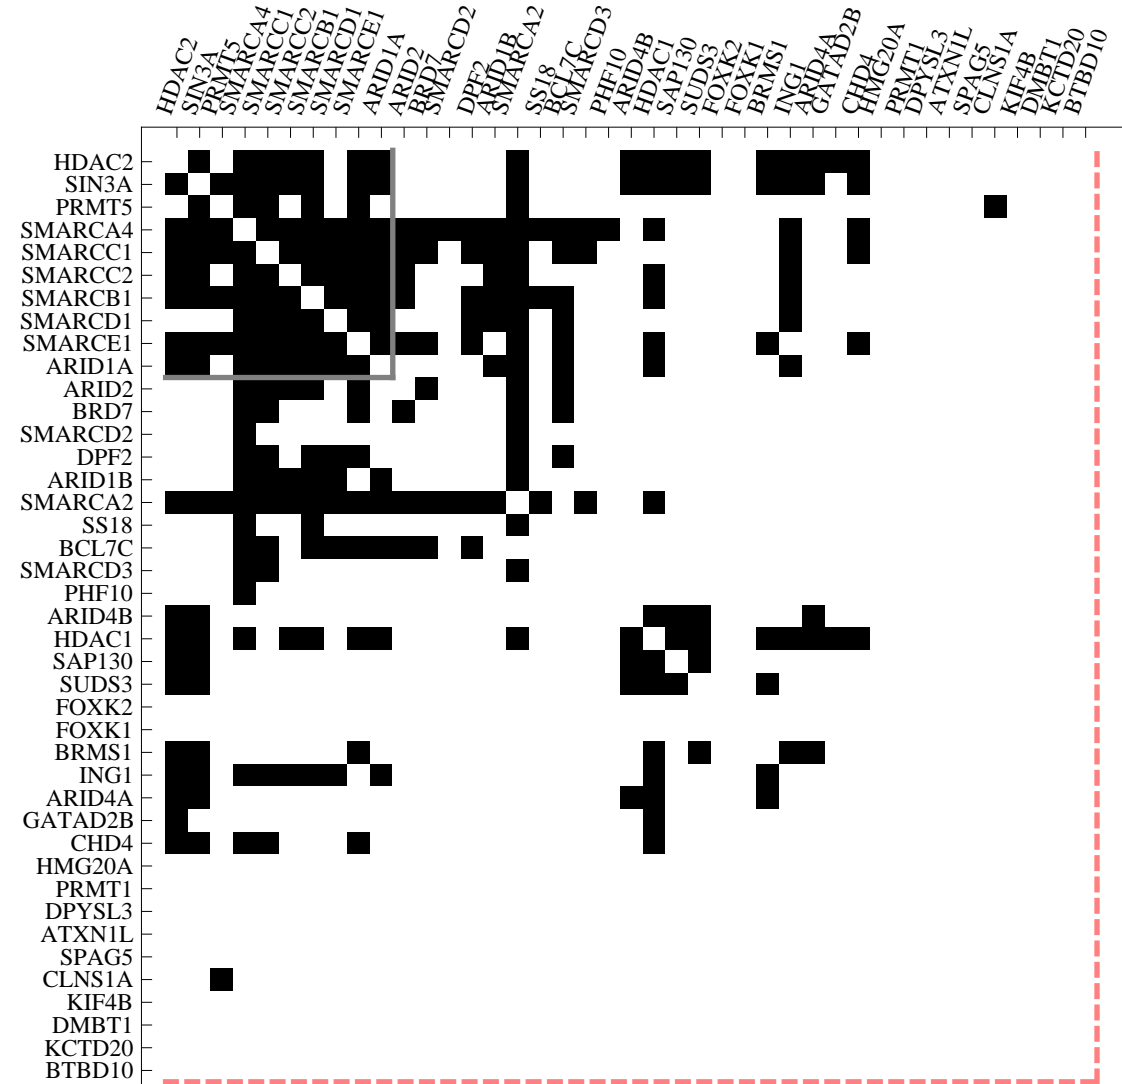





Anti-Sm protein complex

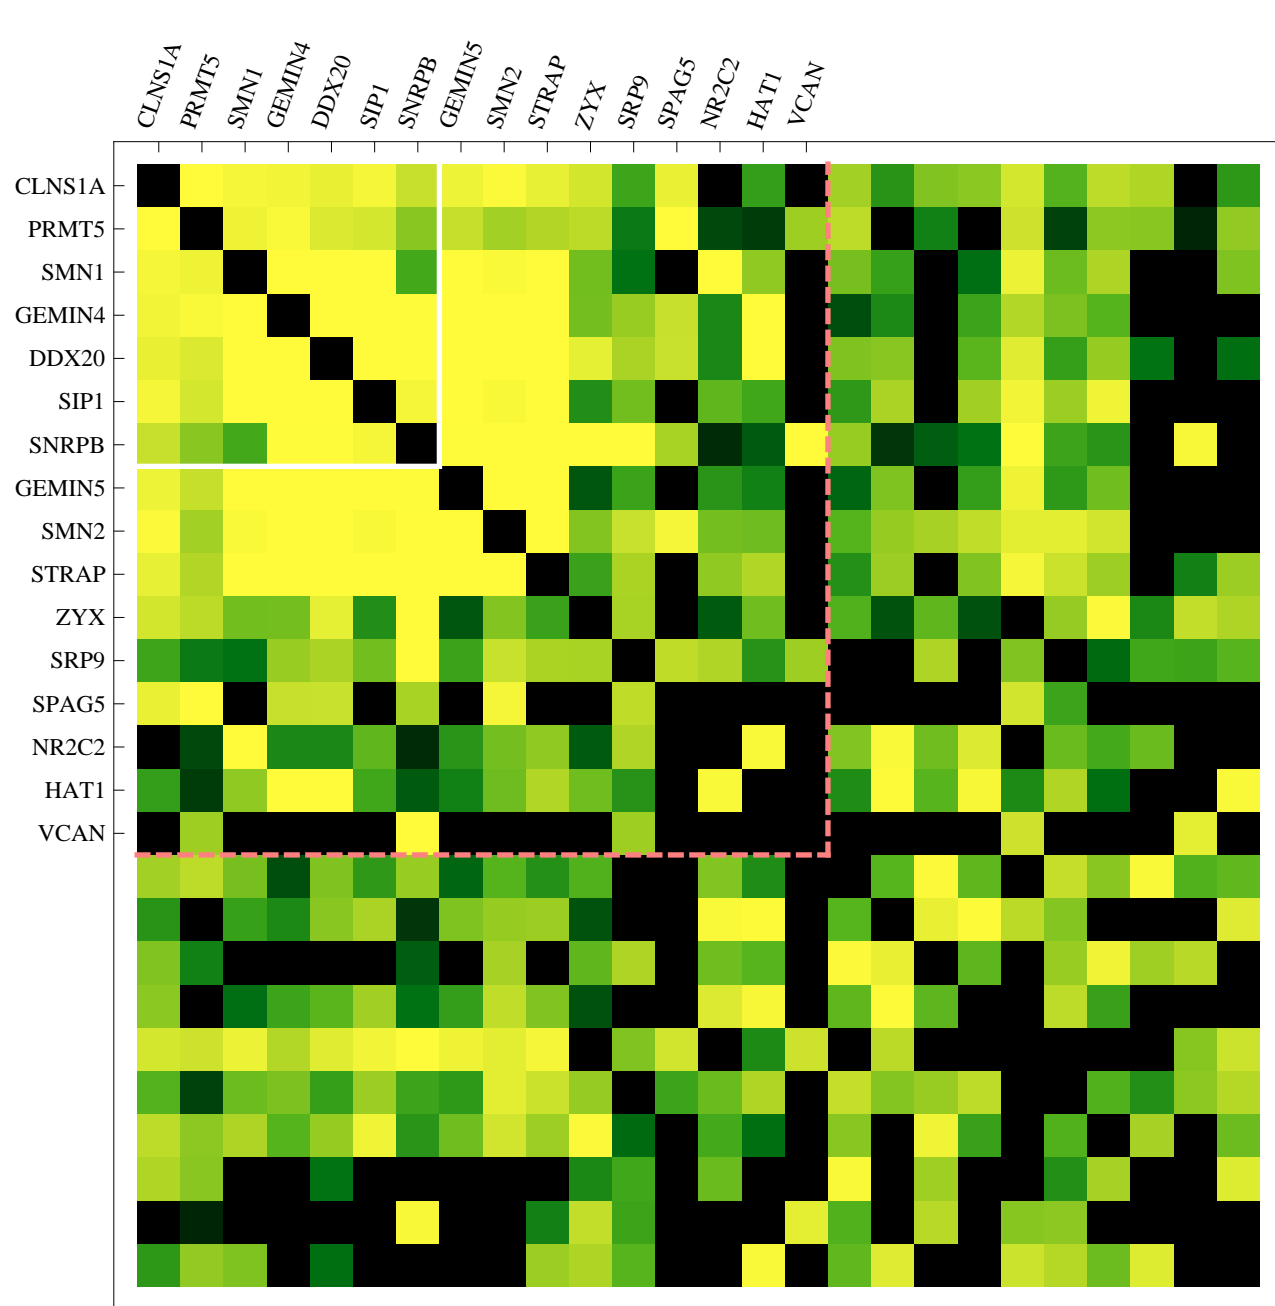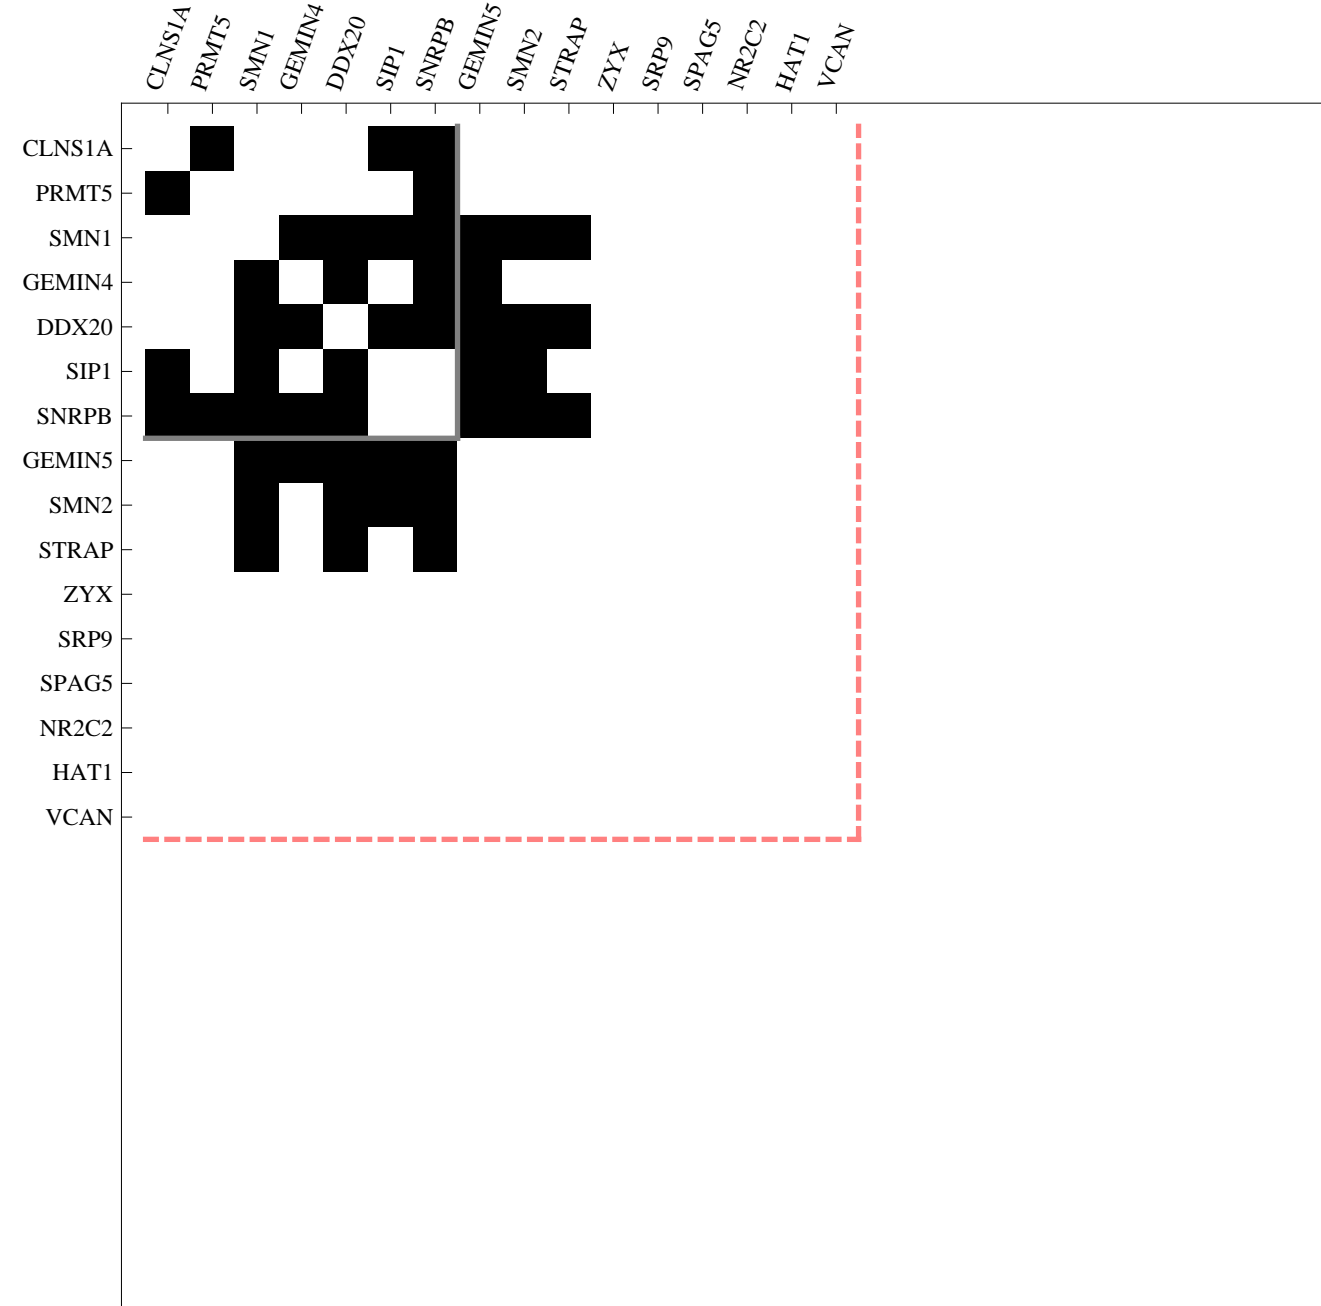



BRAF53-BRCA2 complex

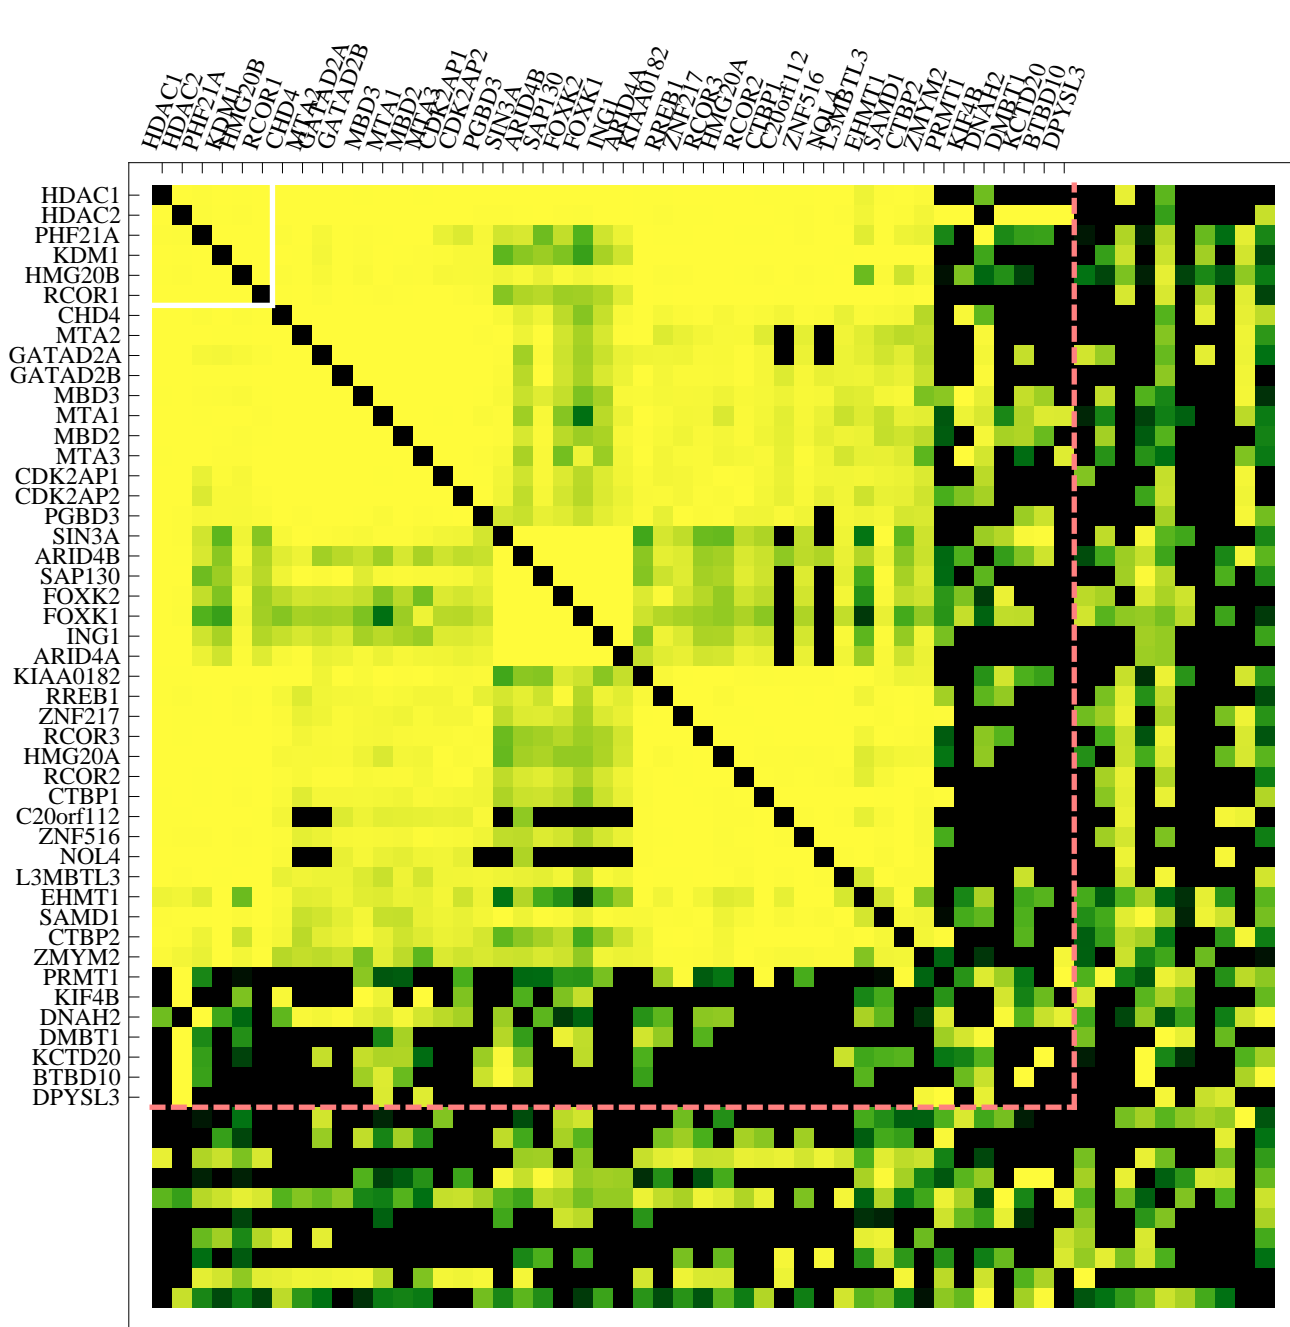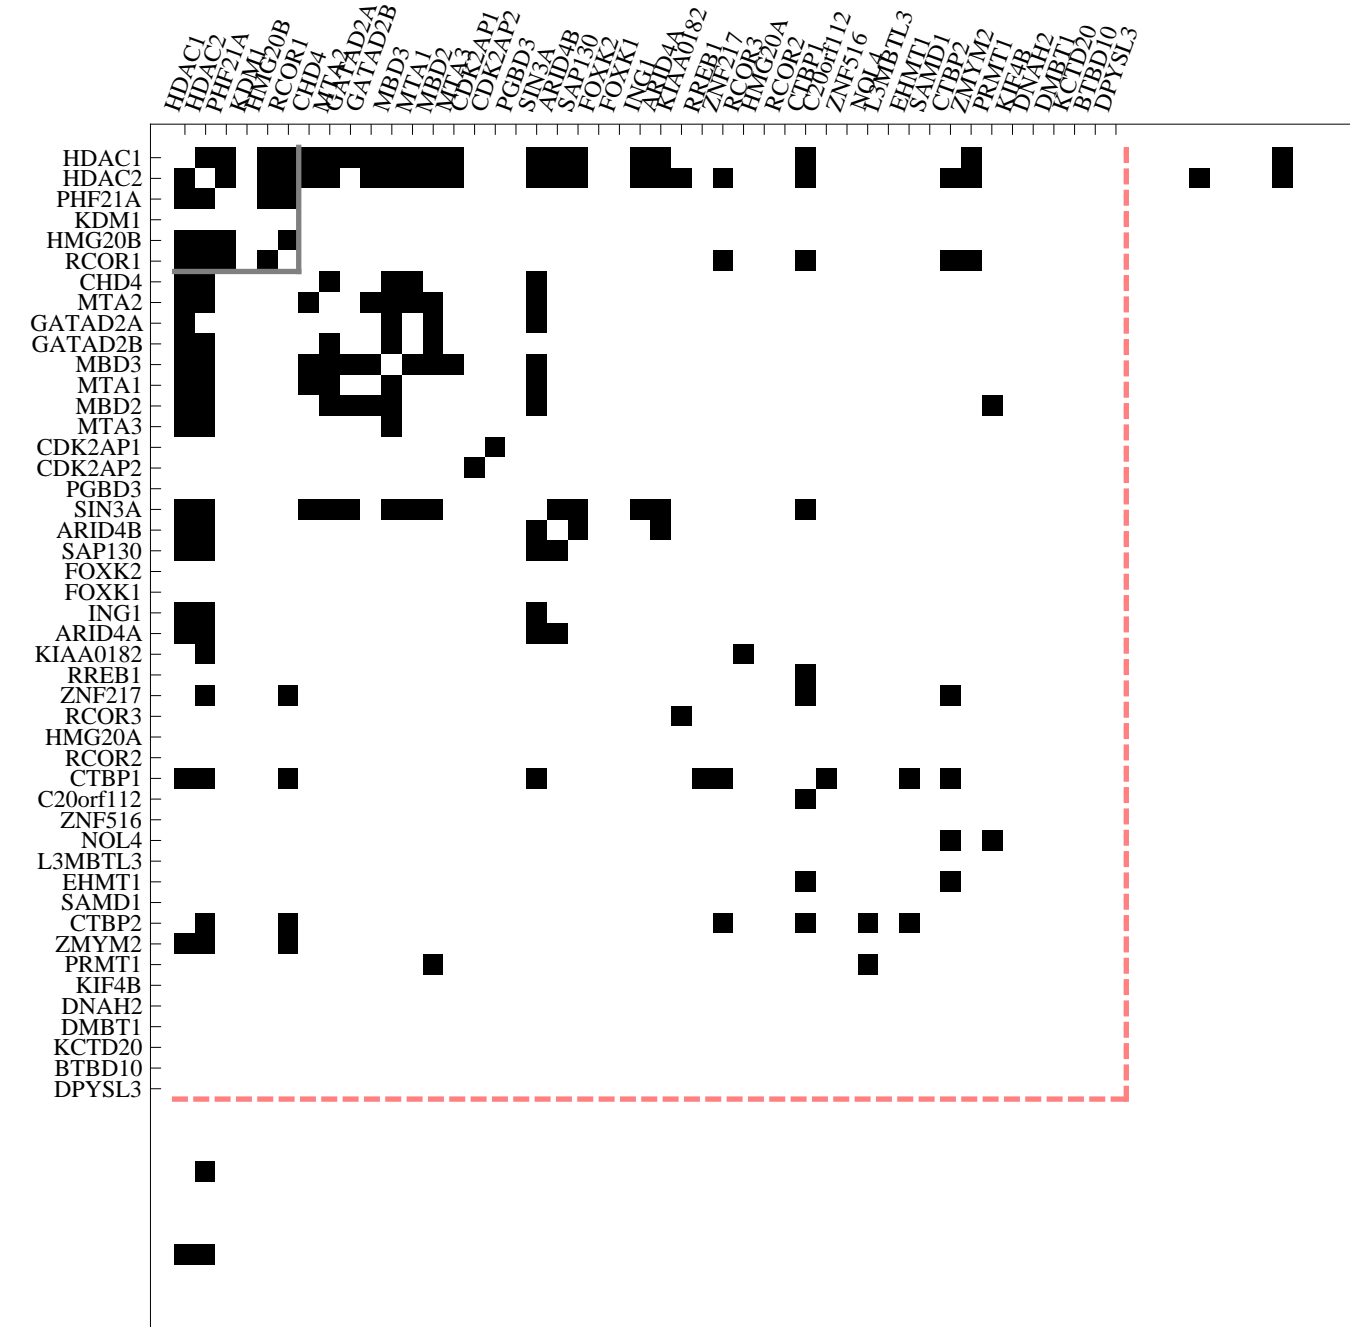



### SMRT complex

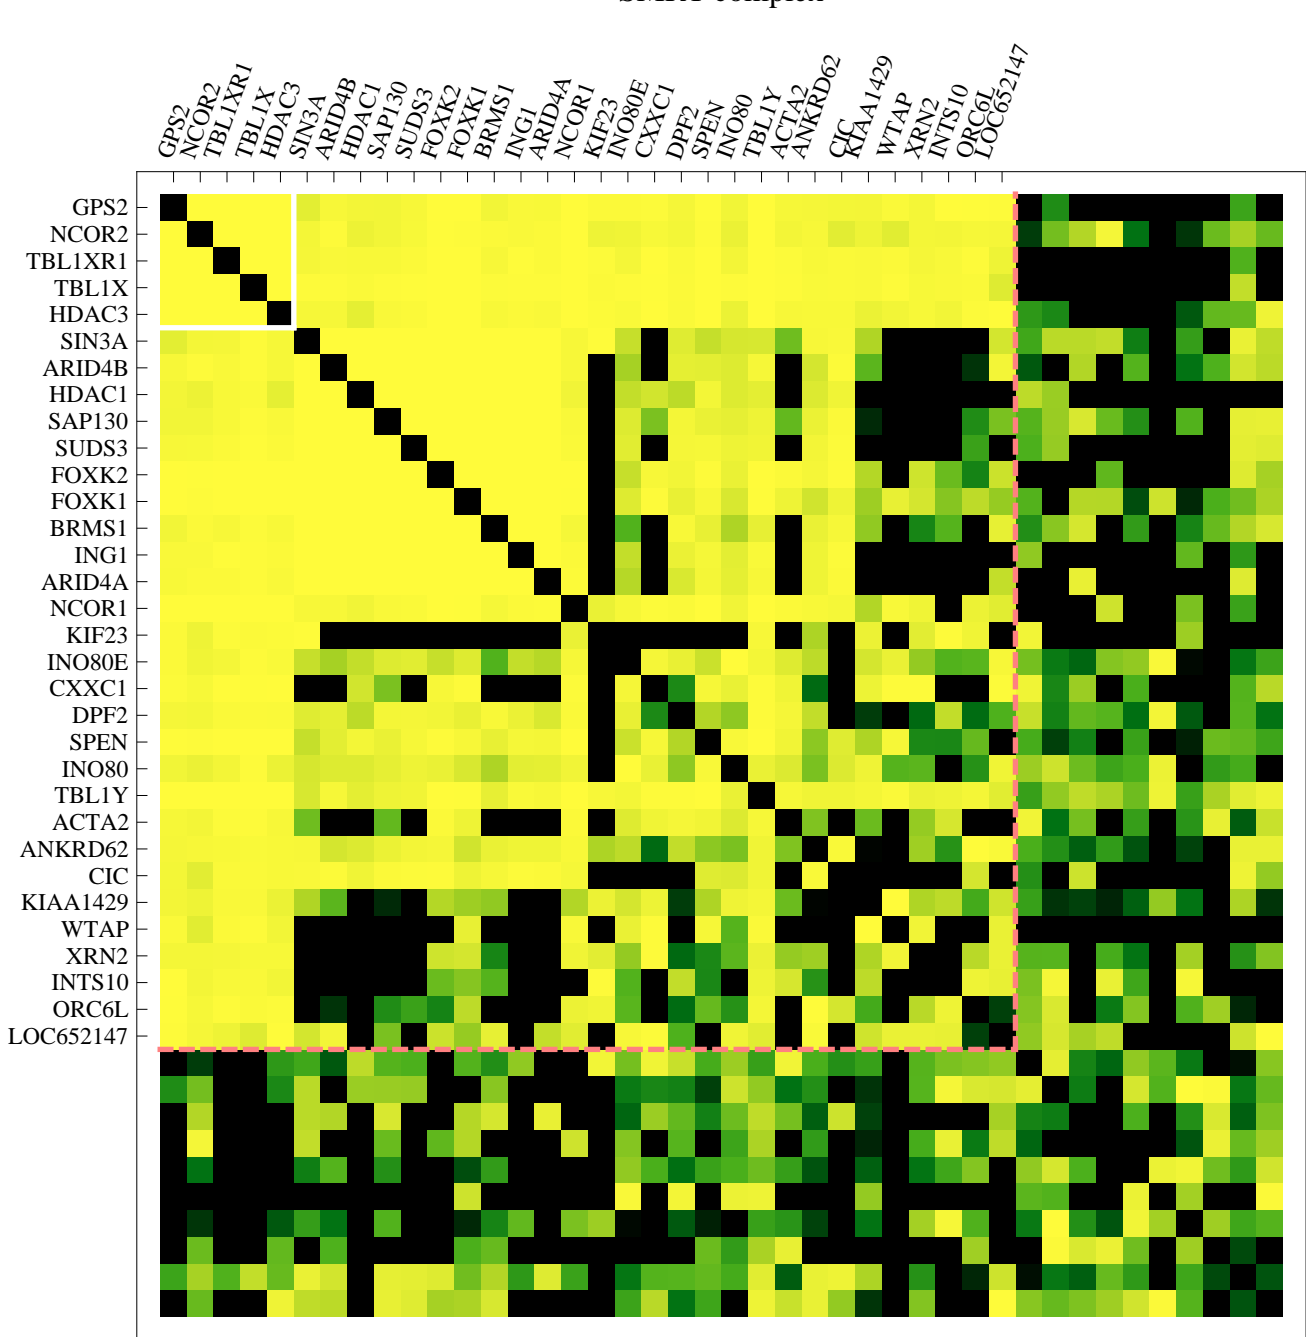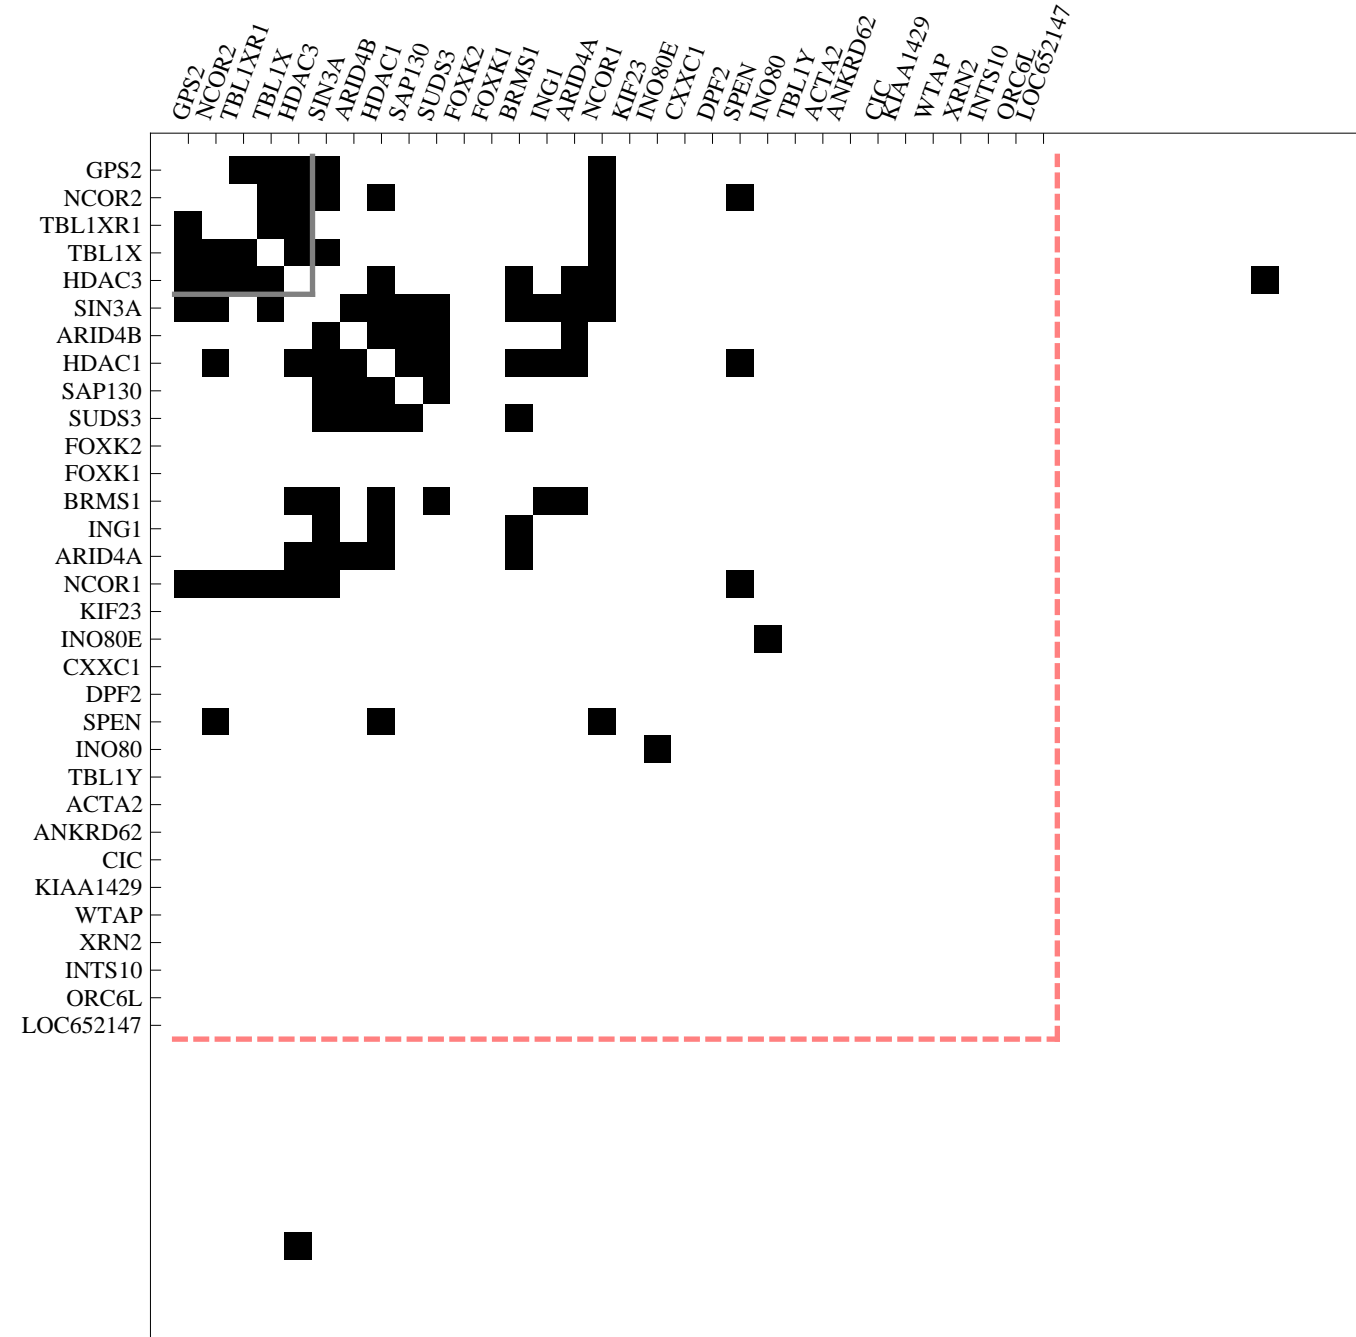

TFIIH transcription factor core complex

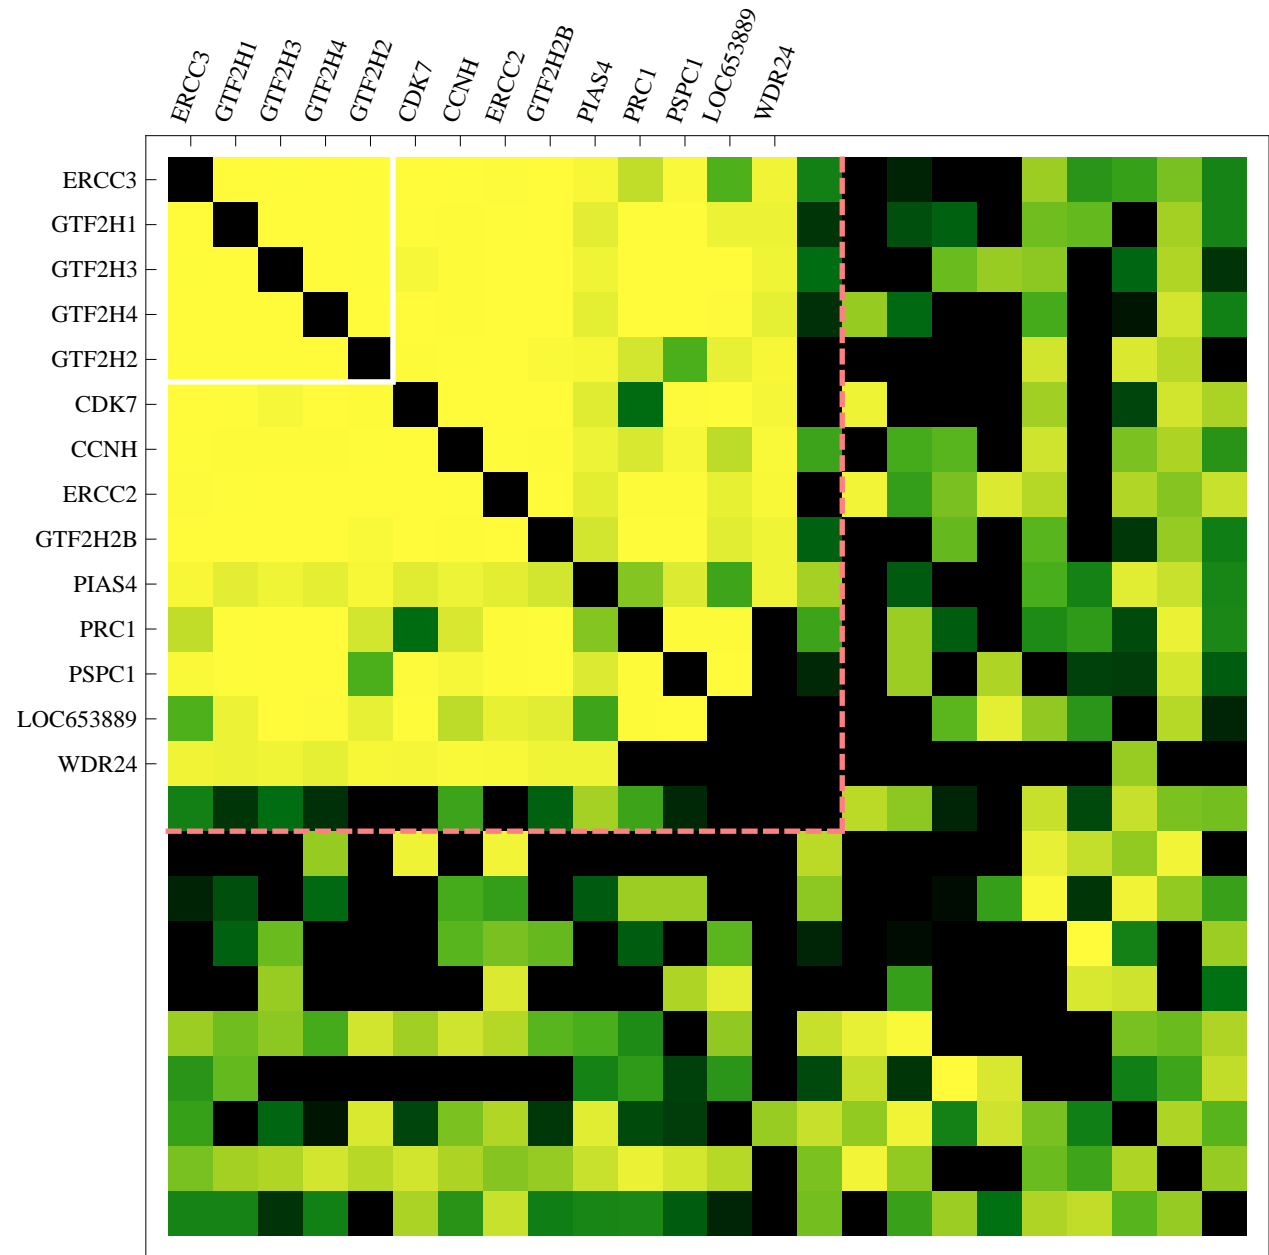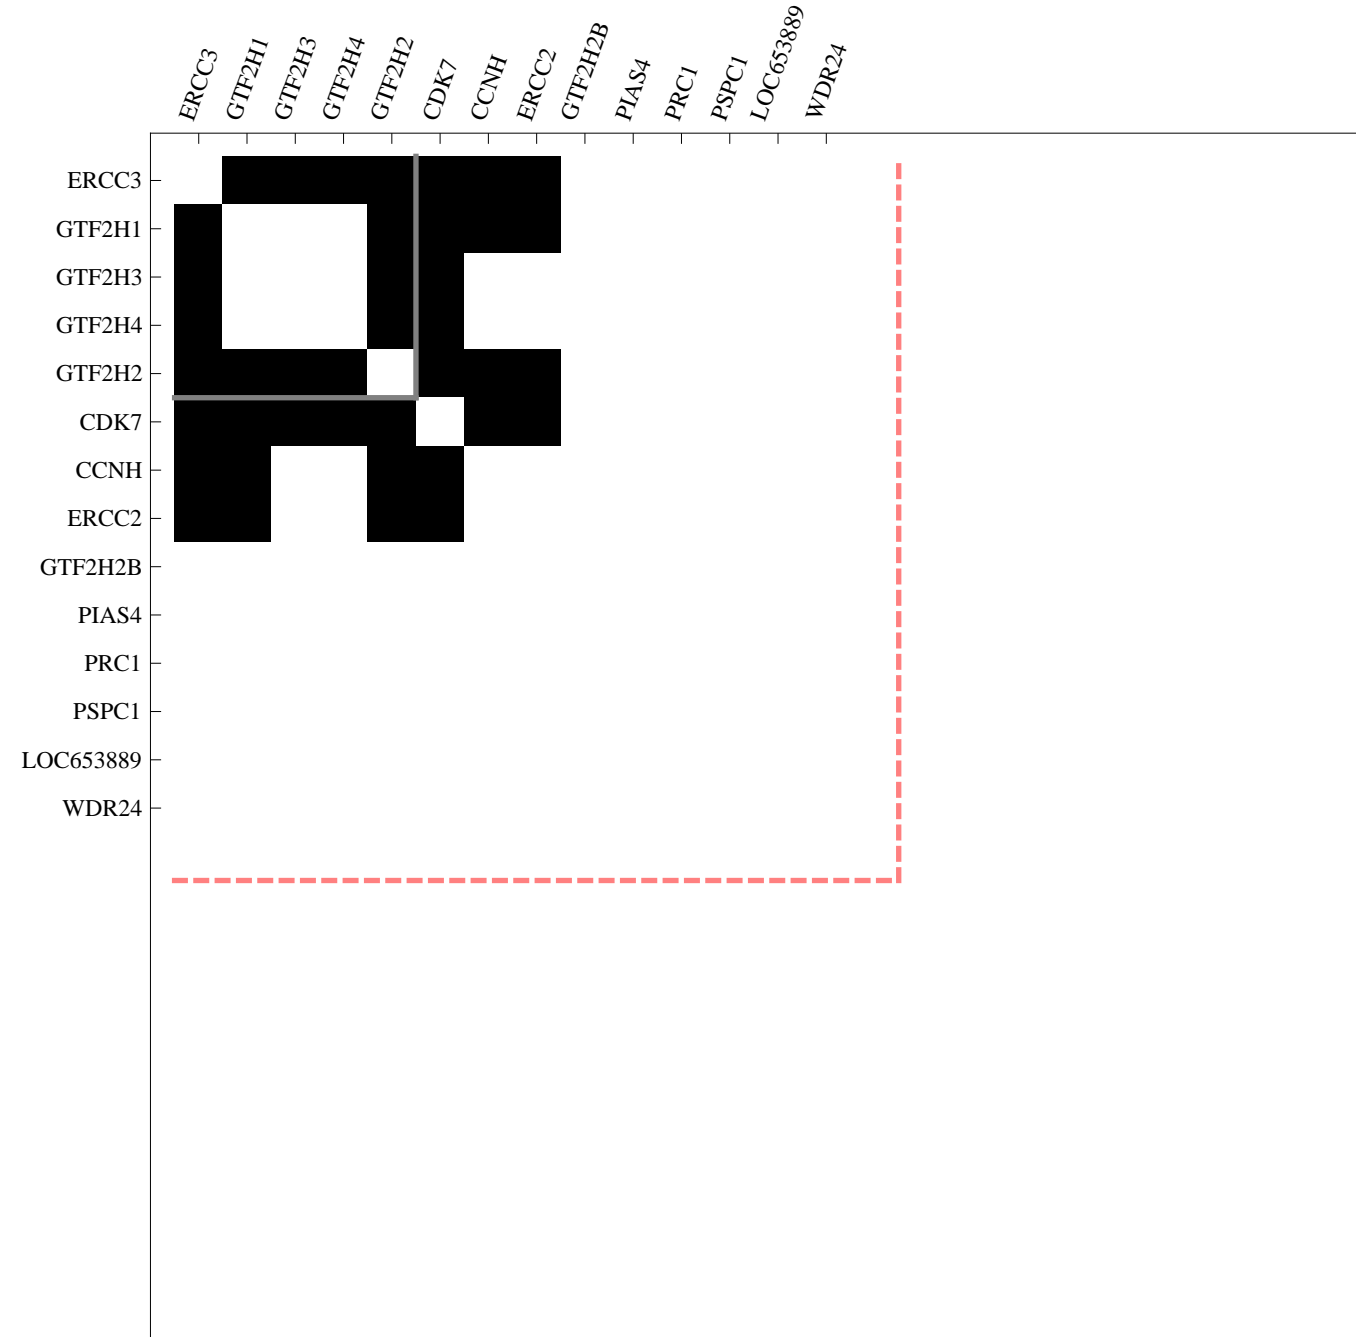

EIF3S6, EIF3S5, EIF3S4, EIF3S3, EIF3S6IP, EIF3S2, EIF3S9, EIF3S12, EIF3S10, EIF3S

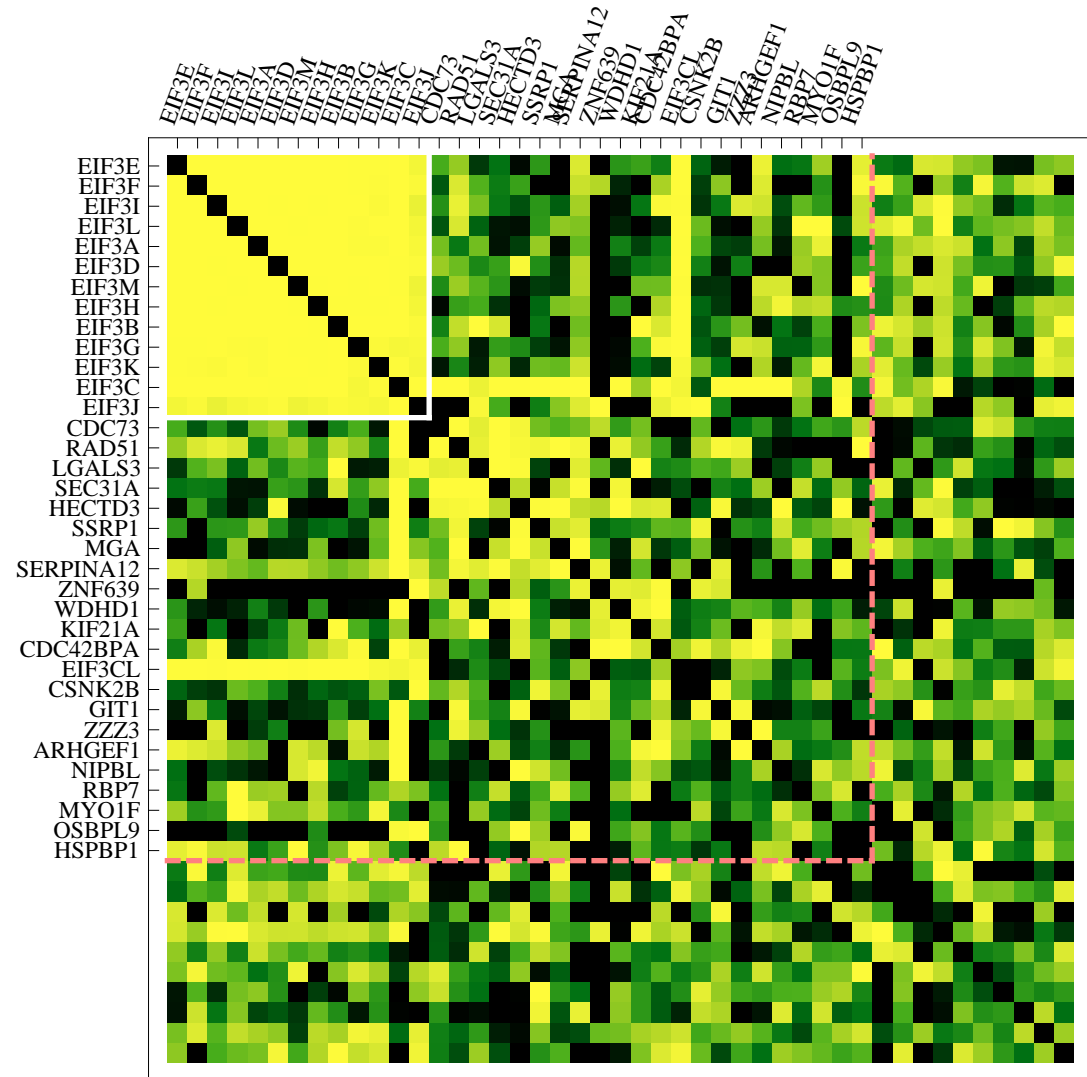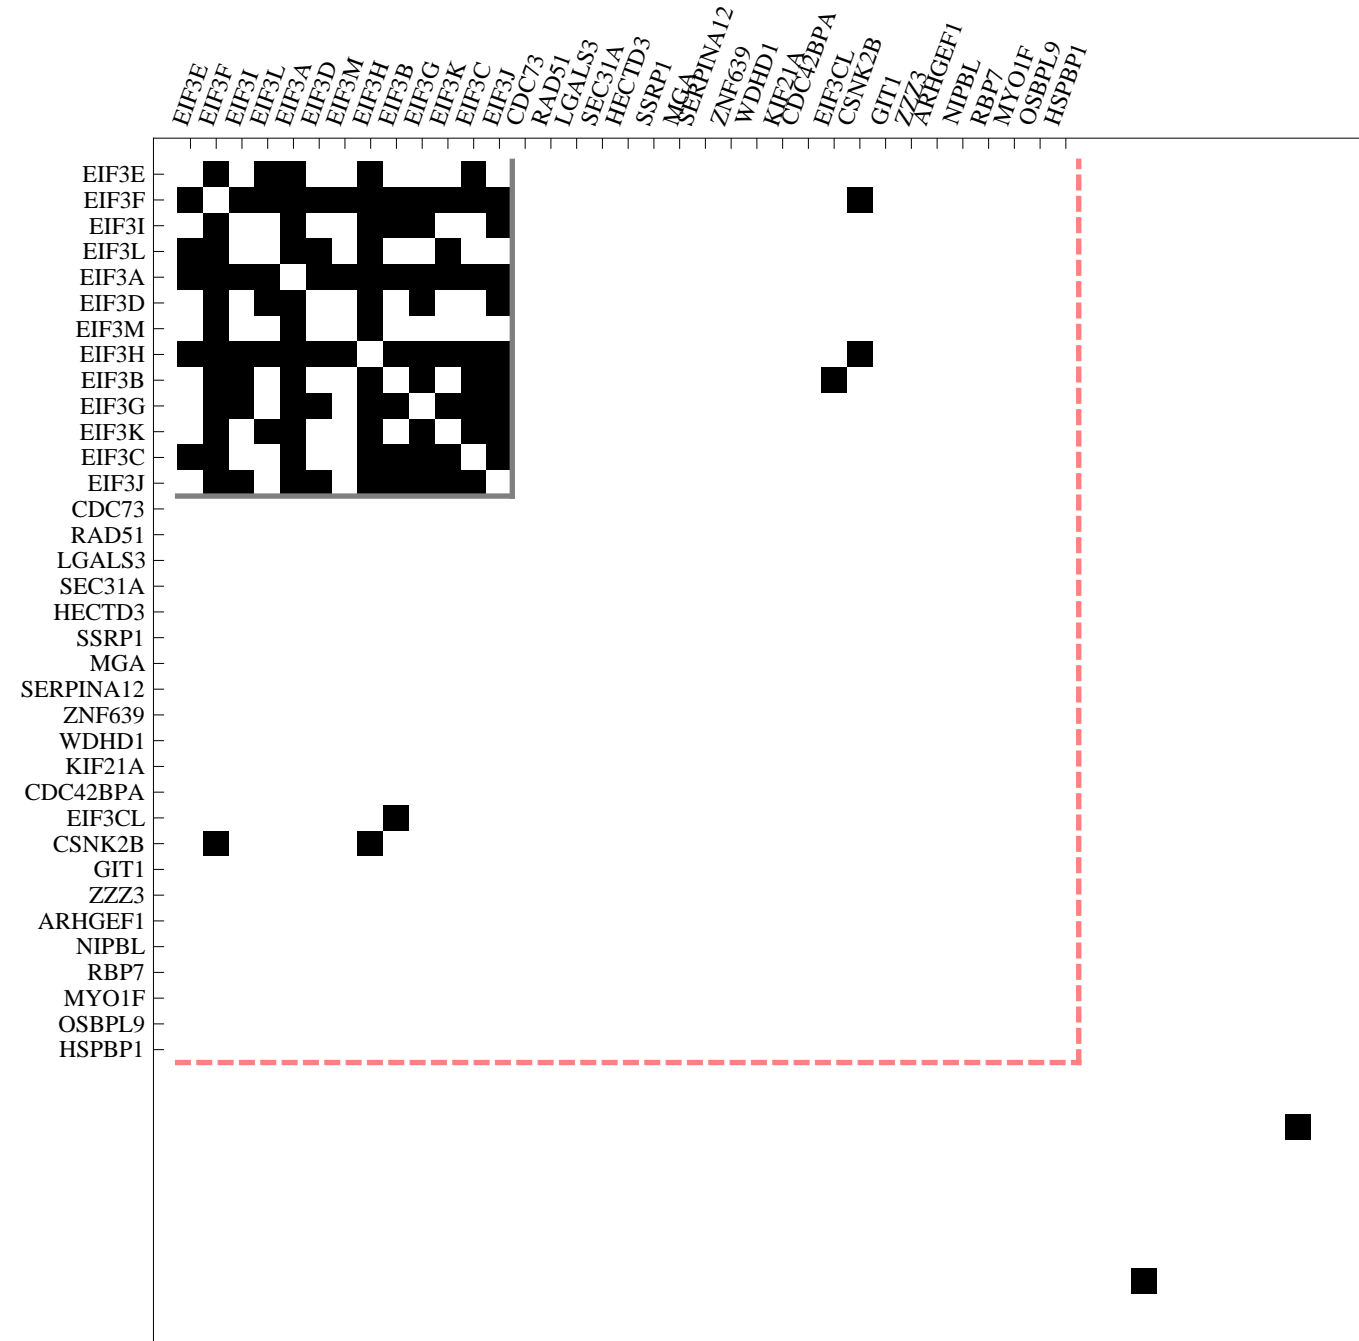



Polyadenylation complex (CSTF1, CSTF2, CSTF3, SYMPK CPSF1, CPSF2, CPSF3)

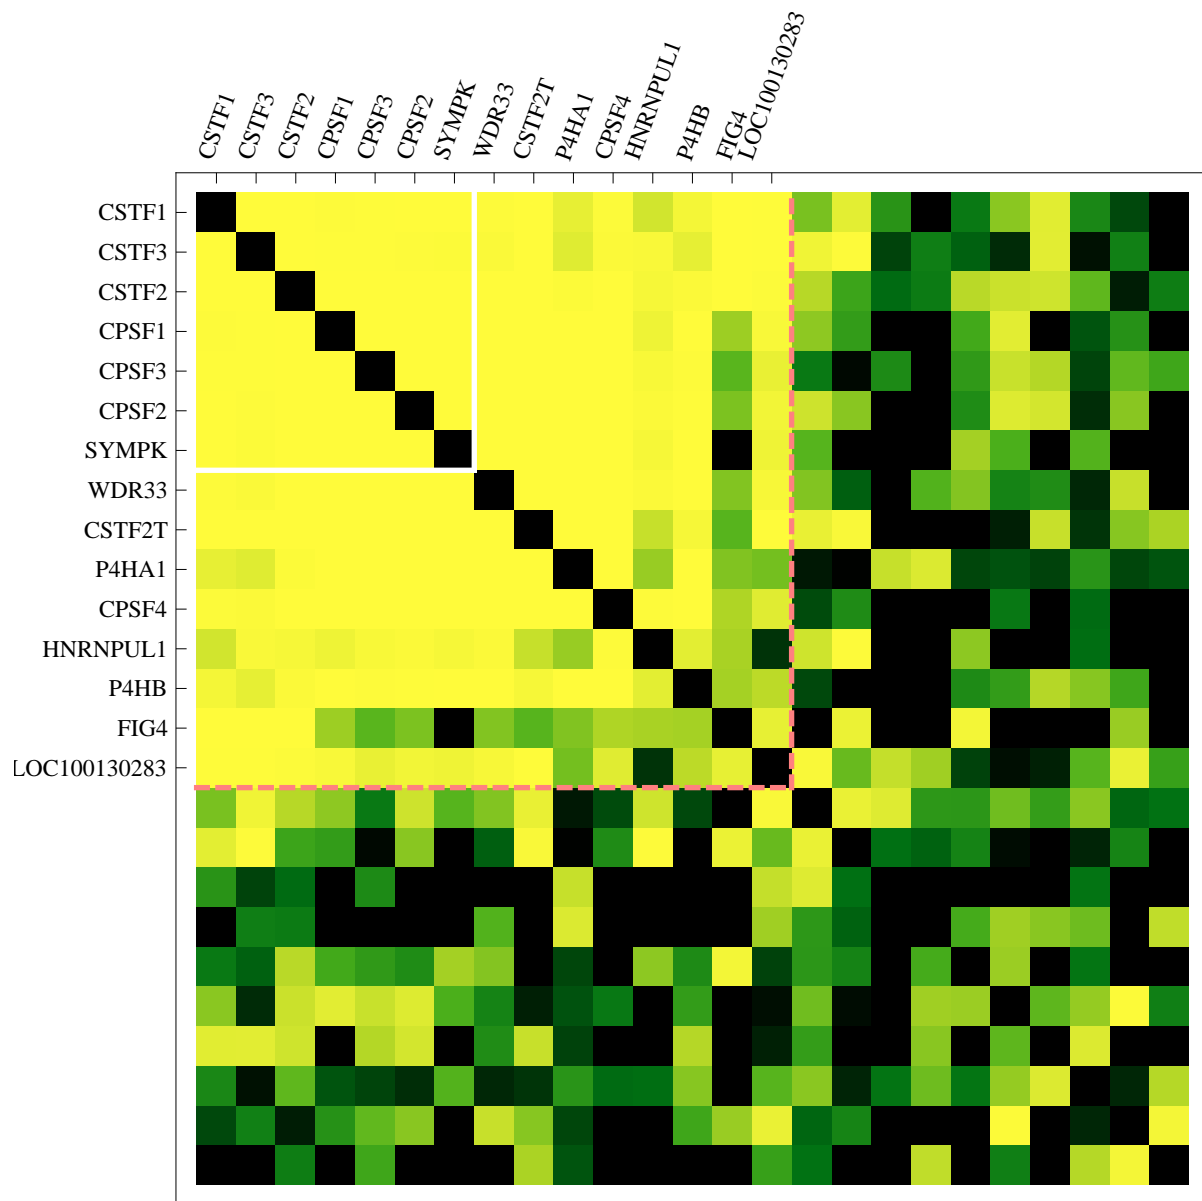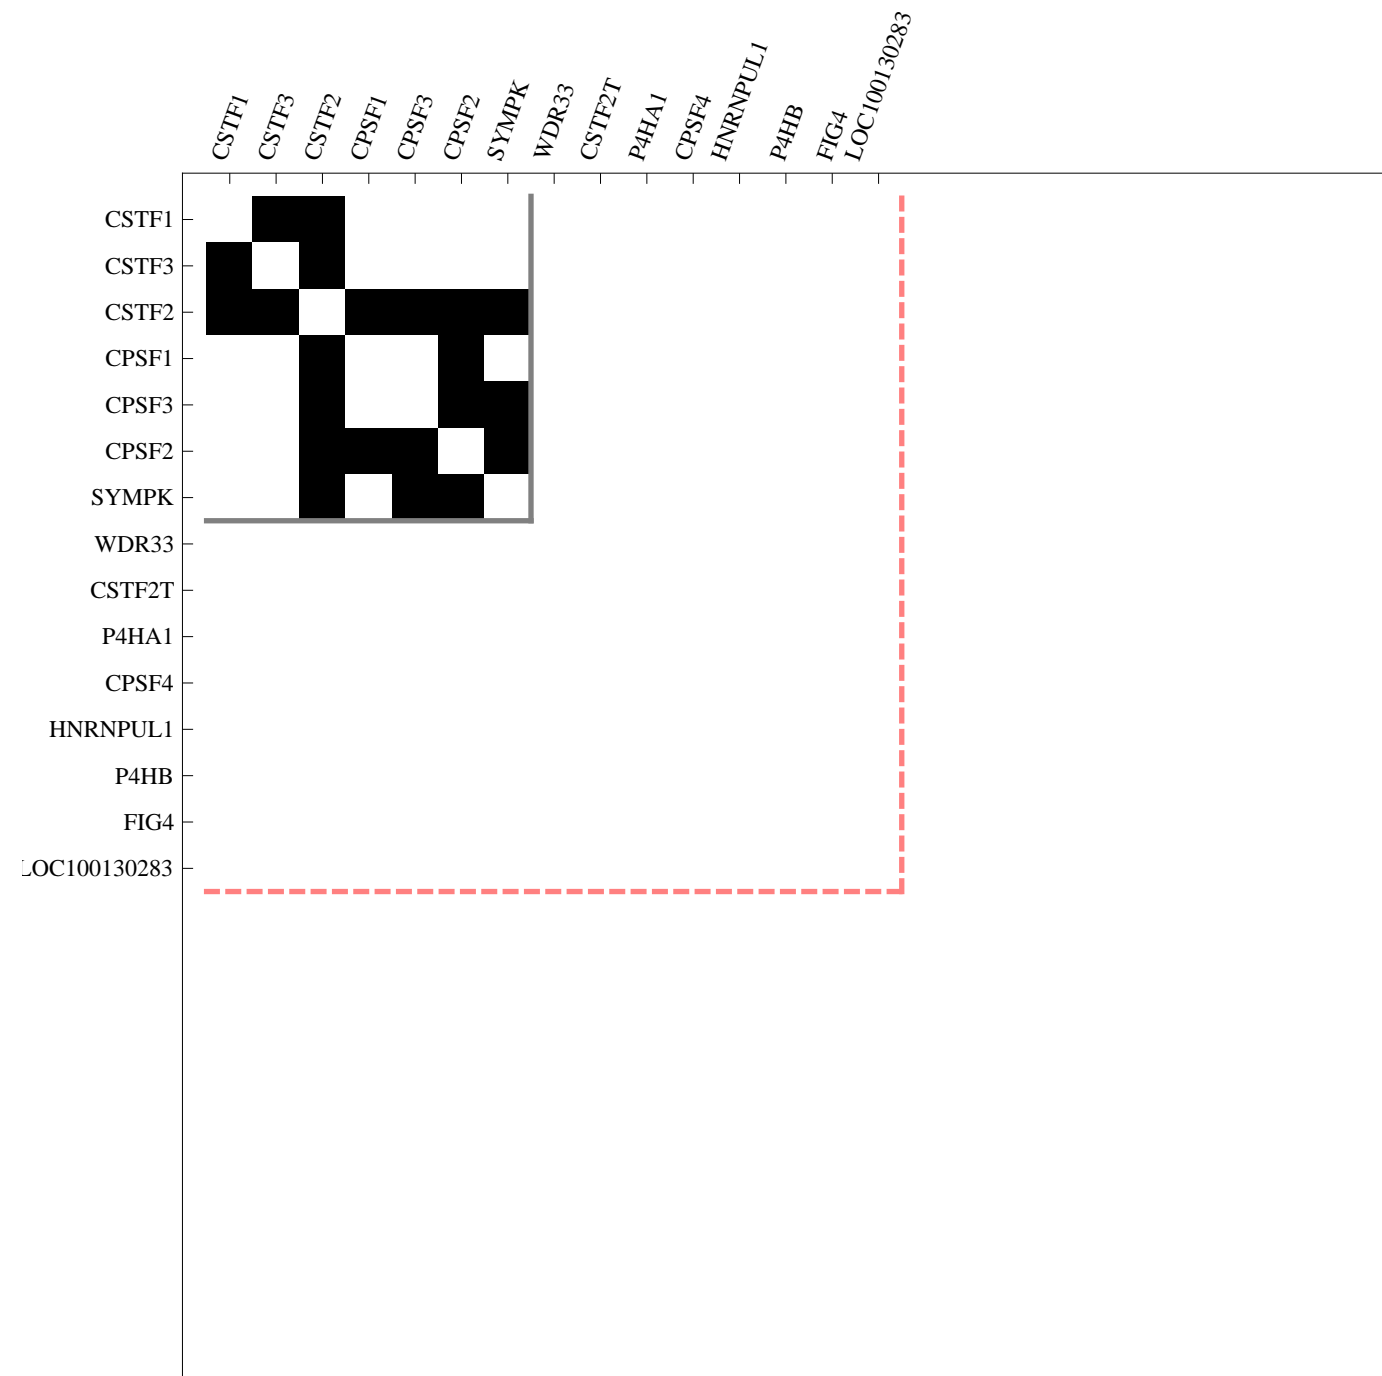

### Integrator complex

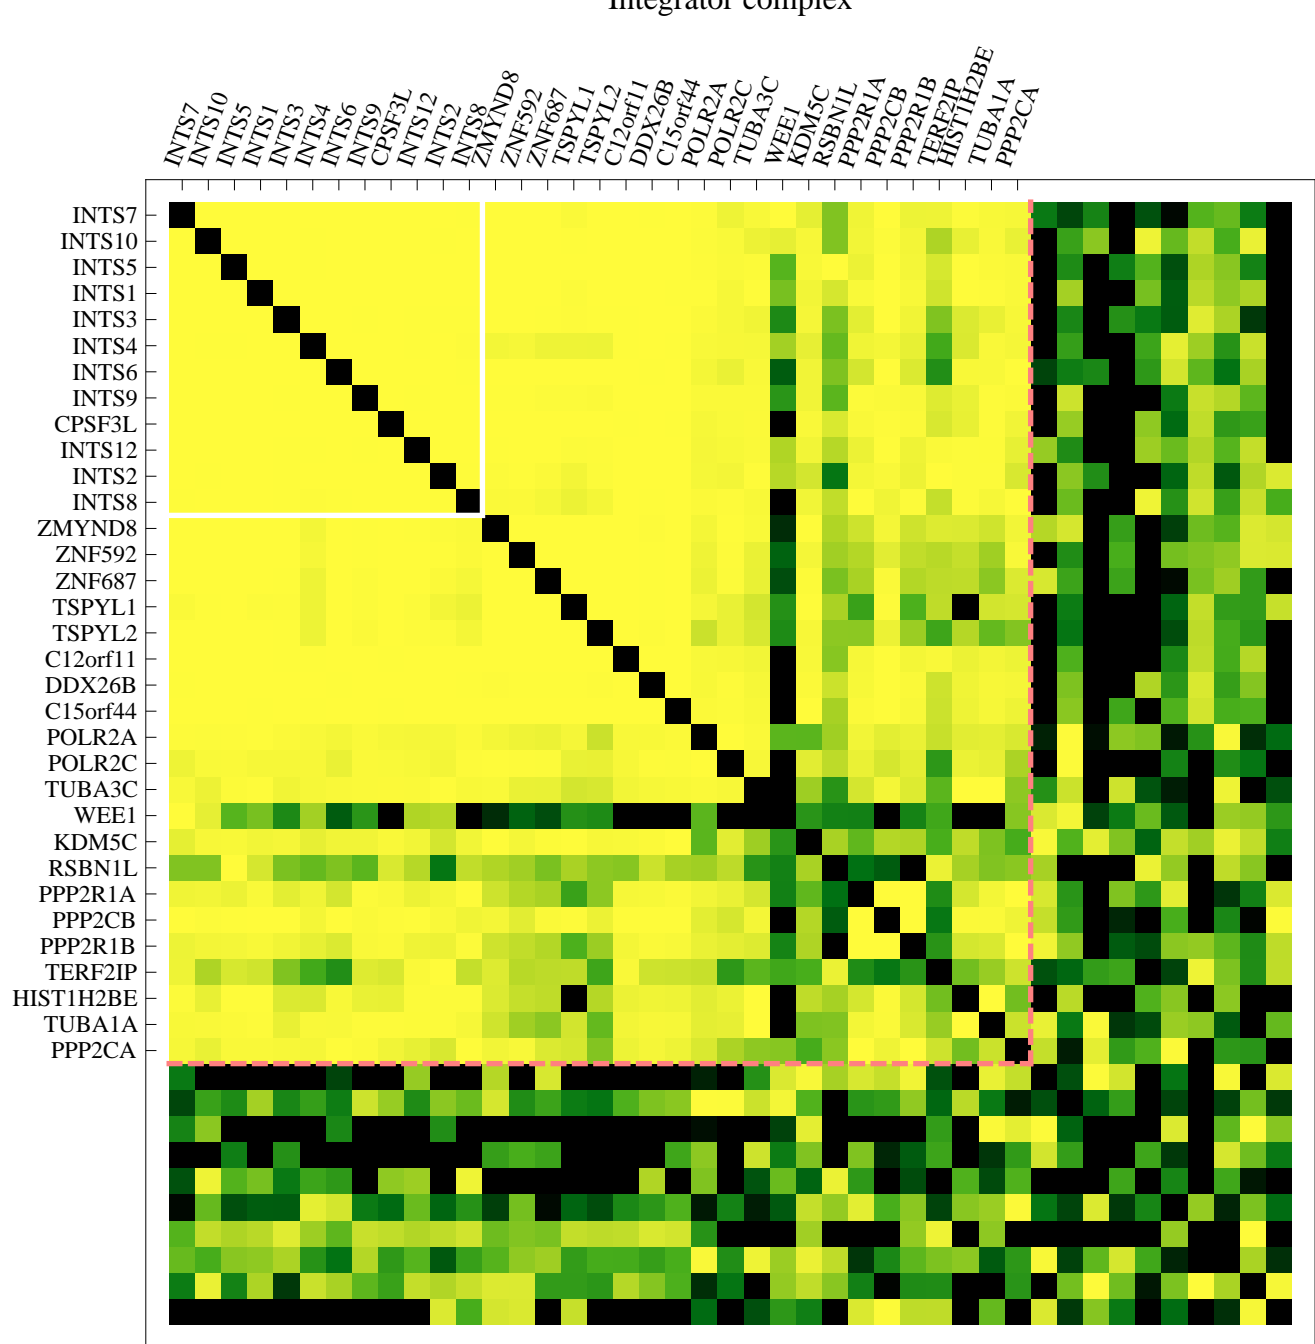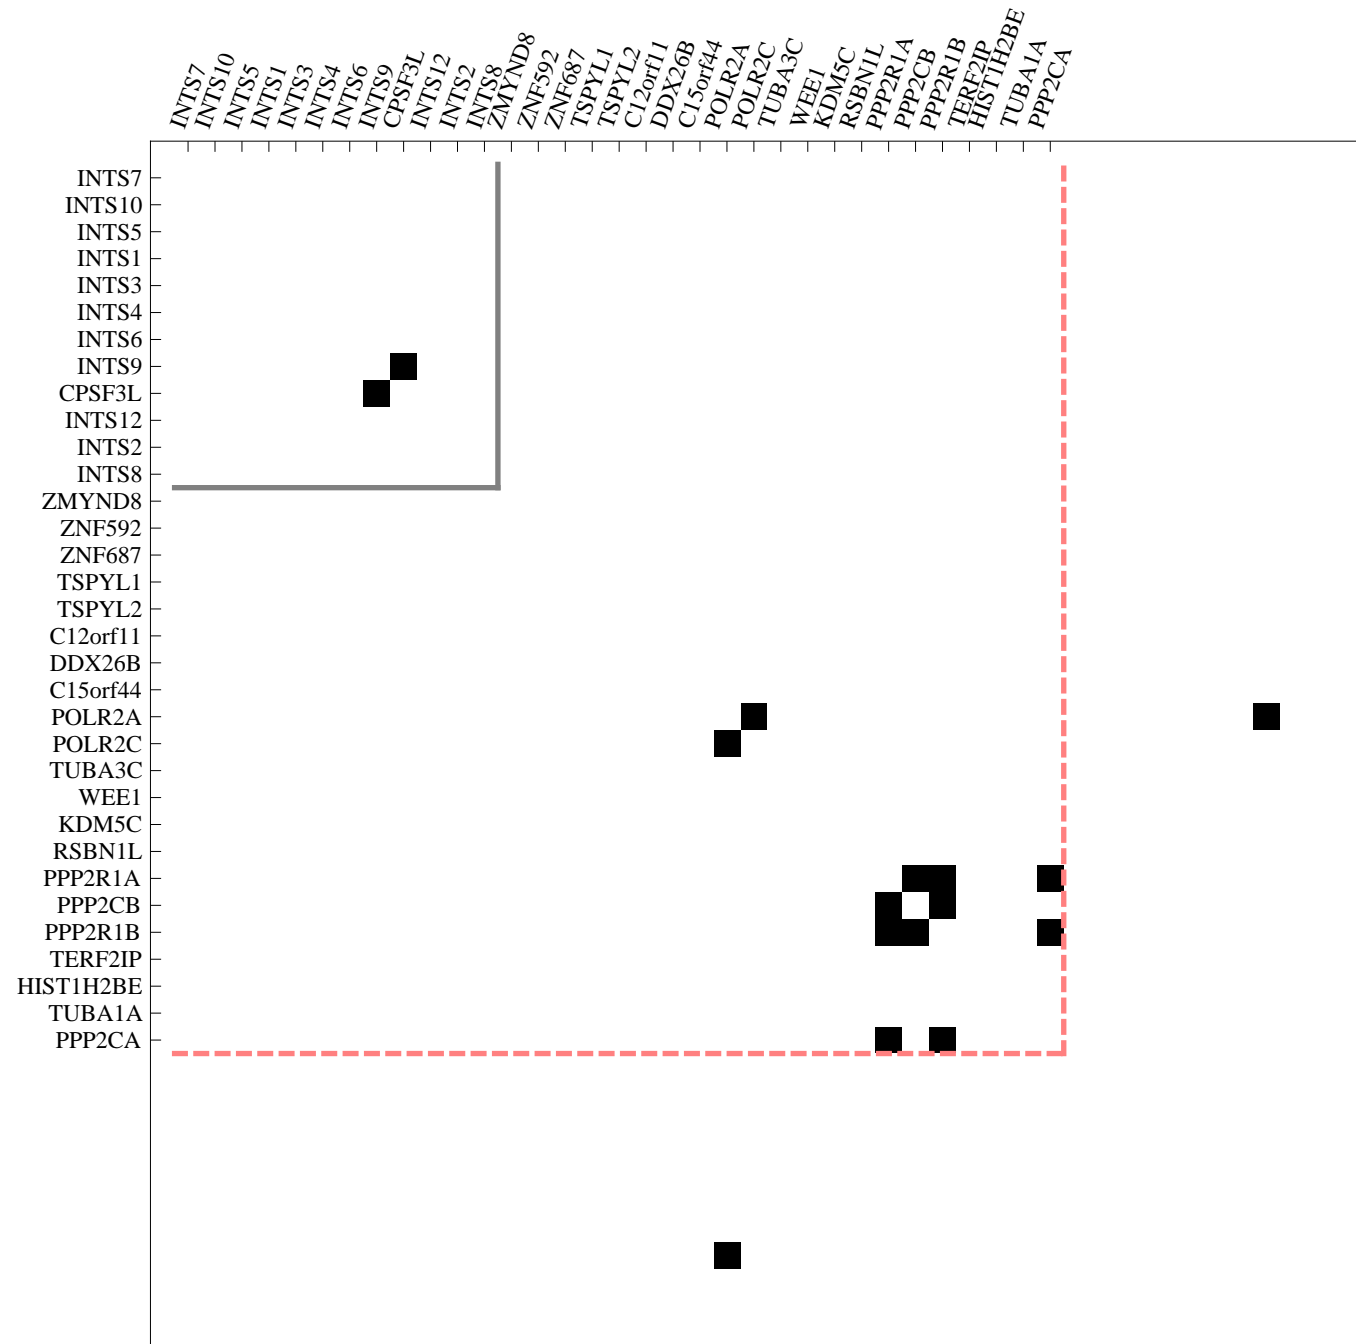

### Integrator-RNAPII complex

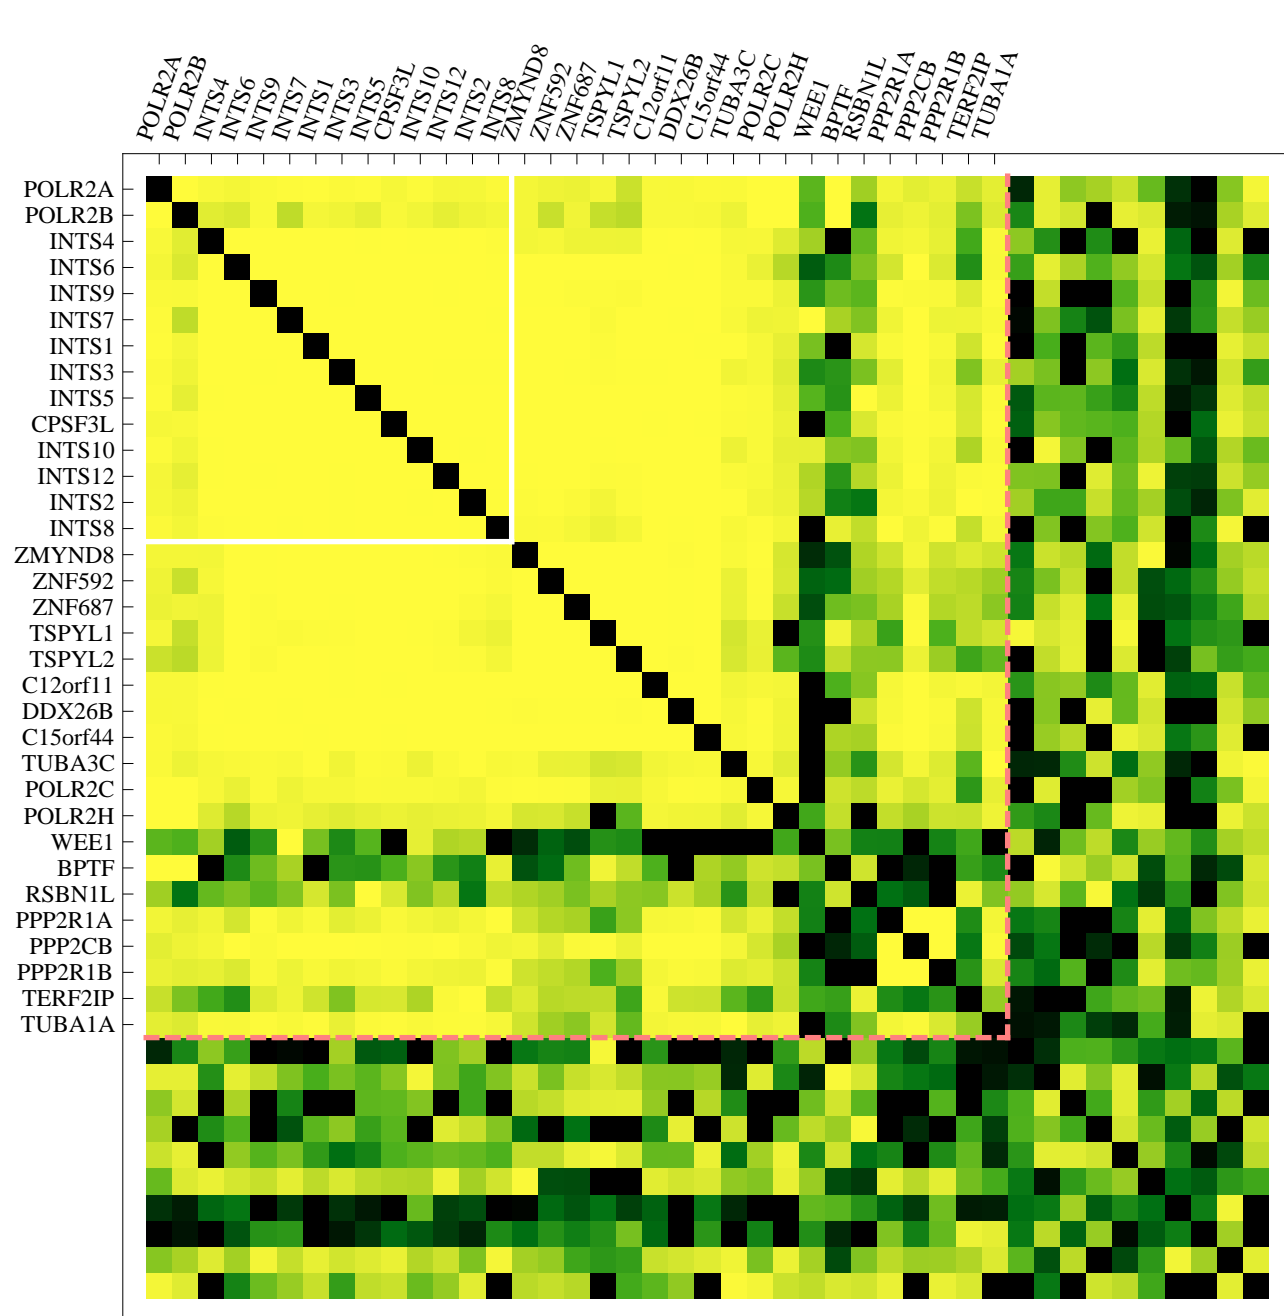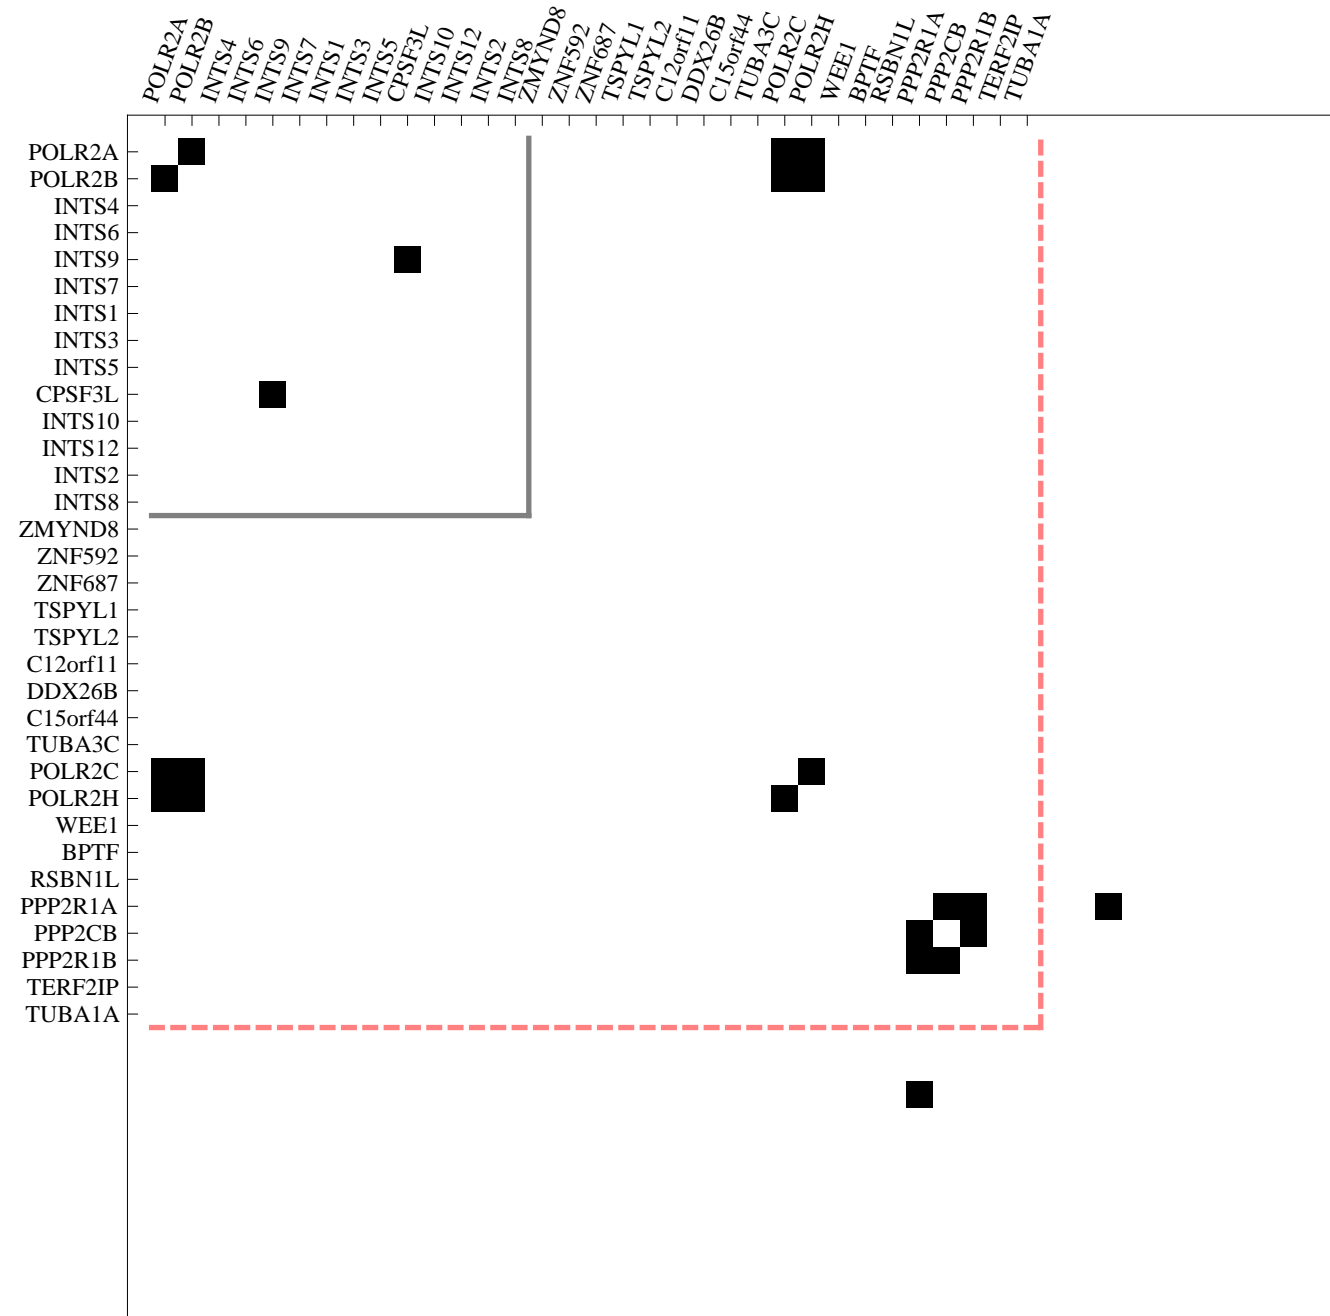

BHC110 complex

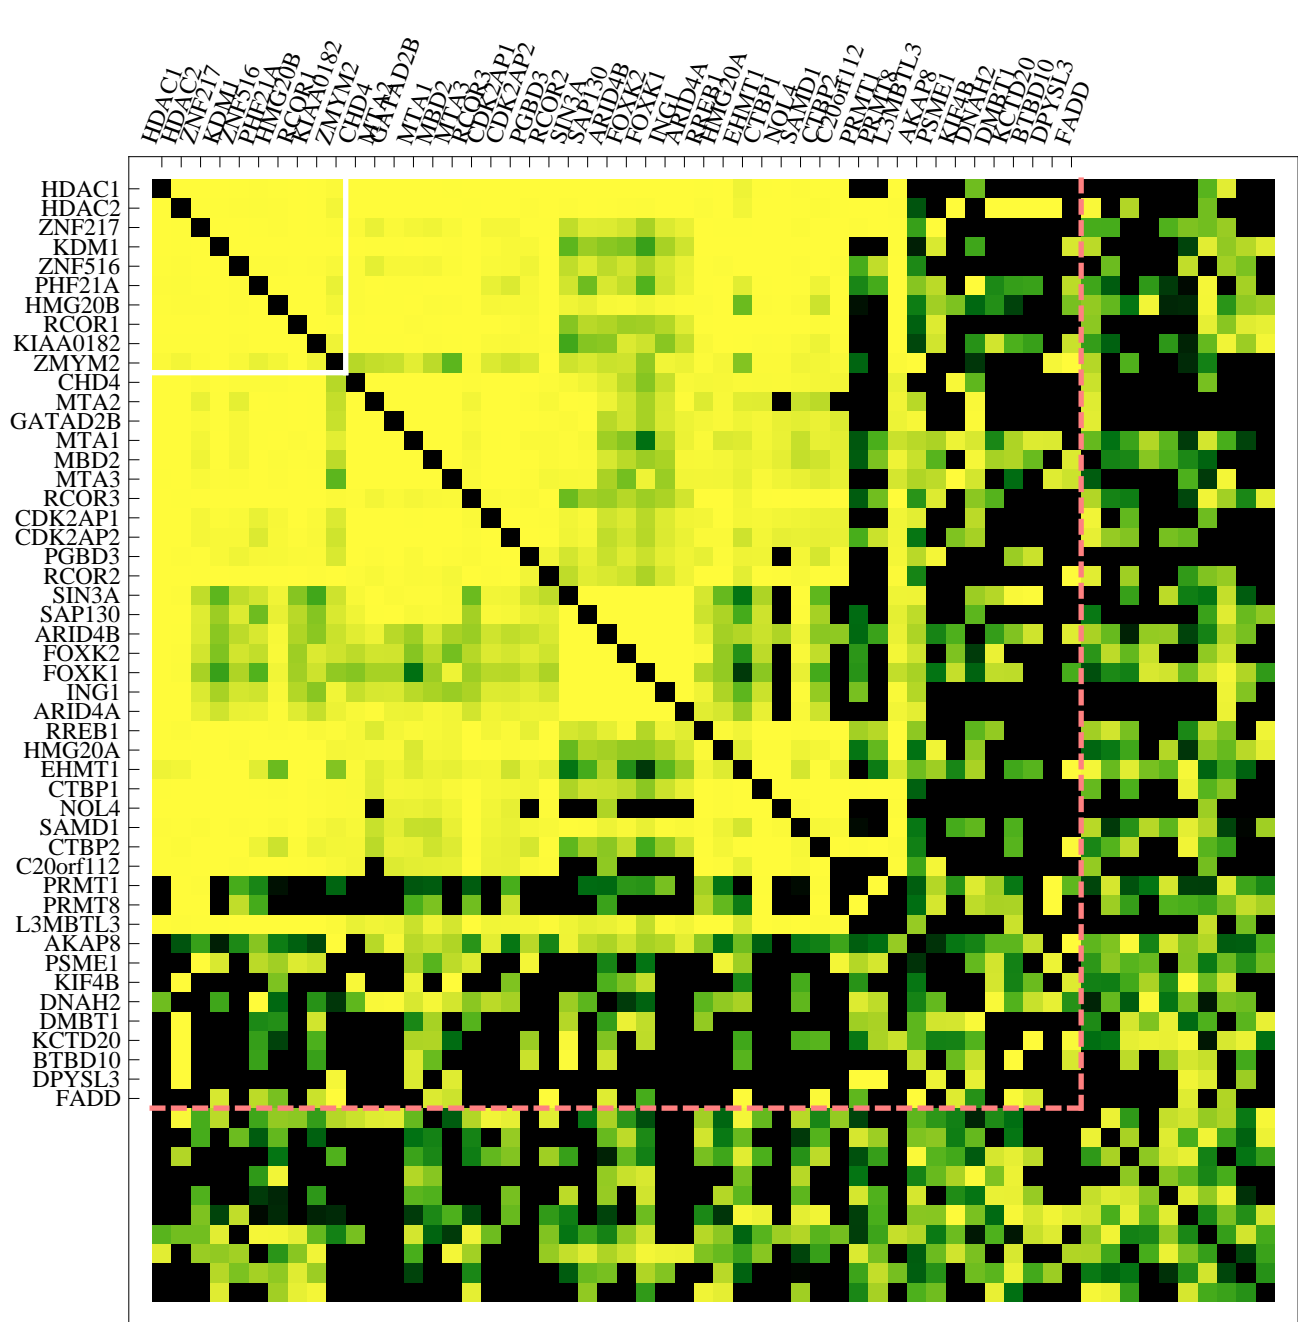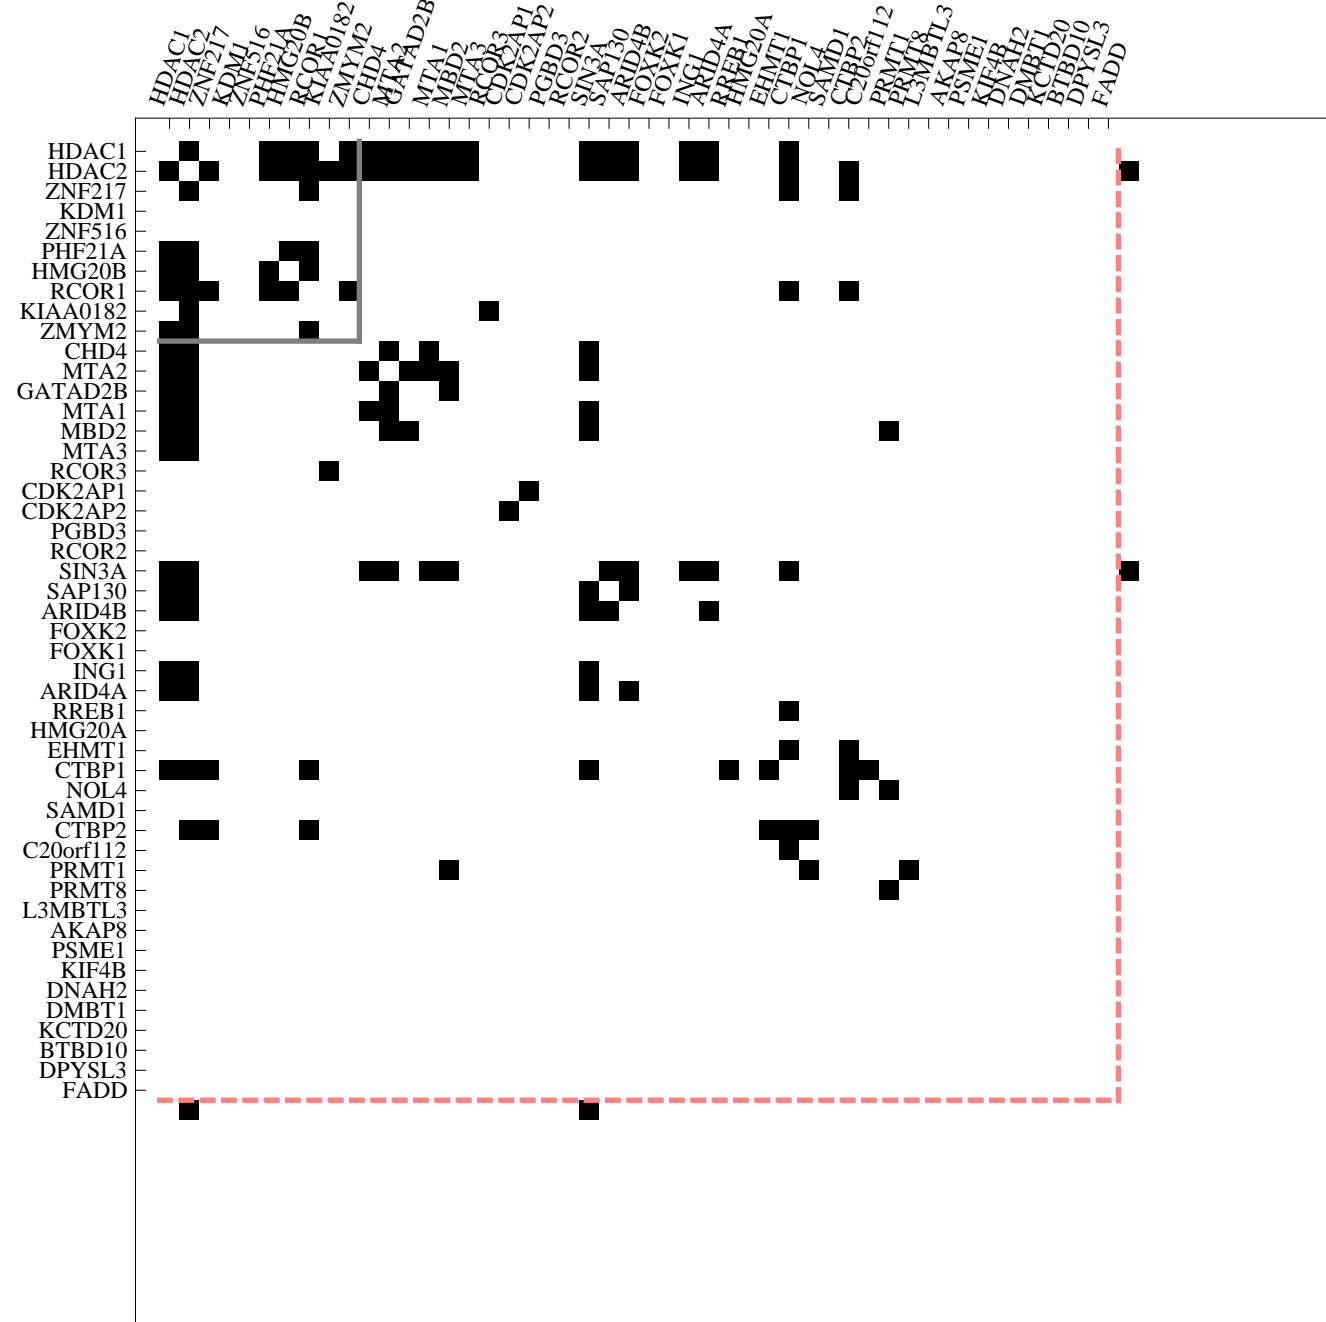



CDCA5-PDS5A-RAD21-SMC1A-PDS5B-SMC3 complex

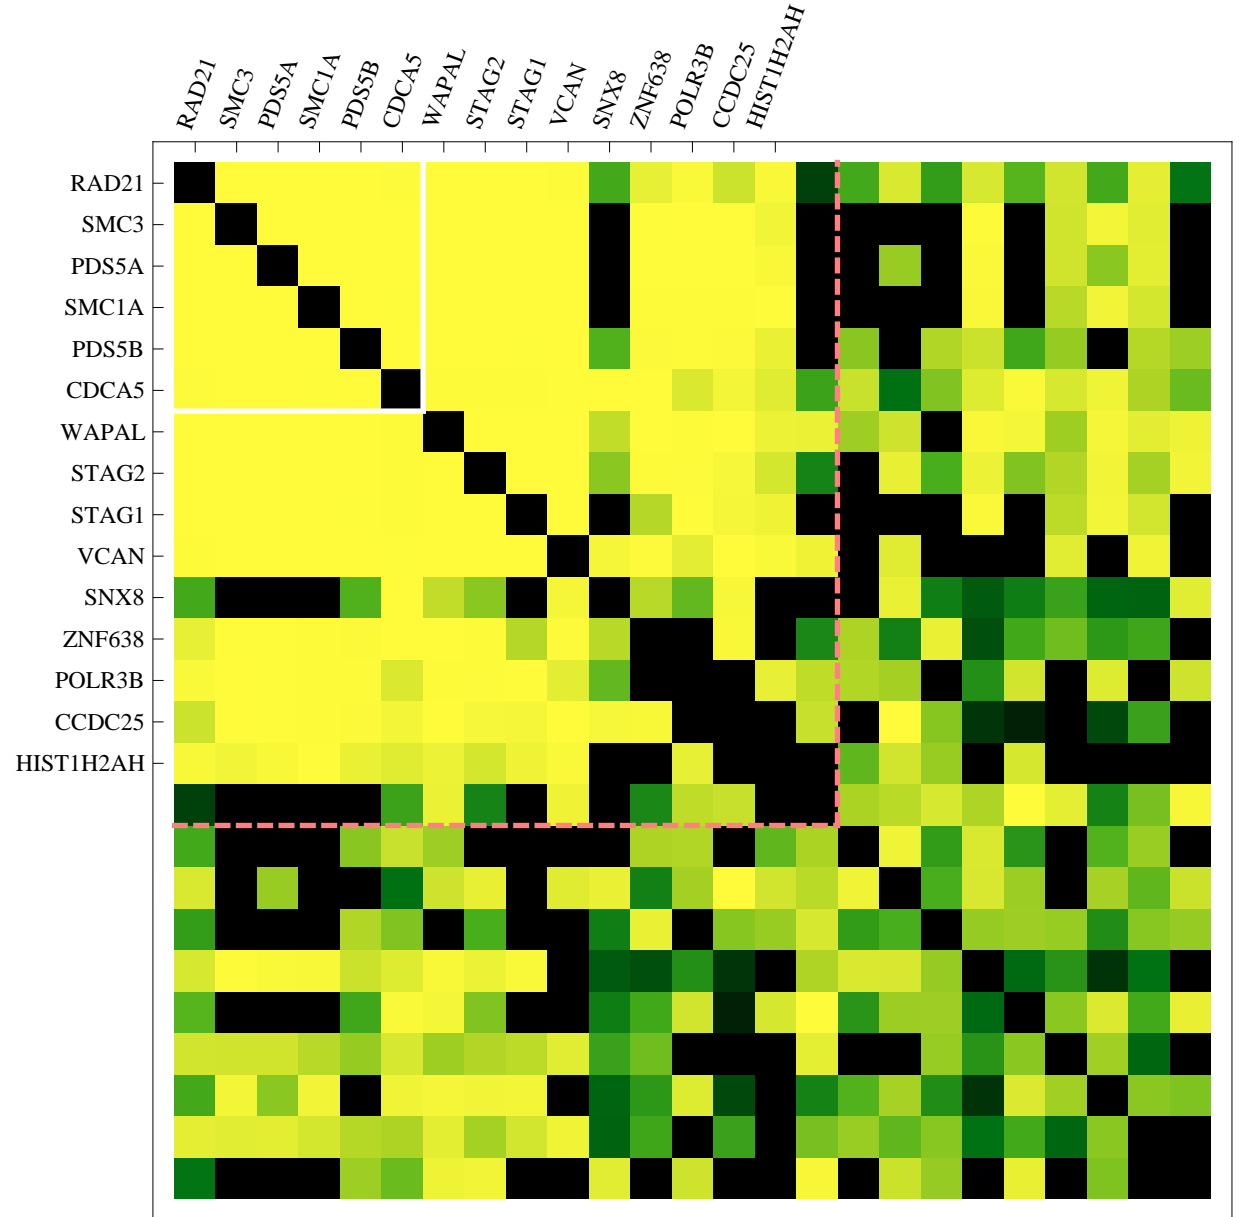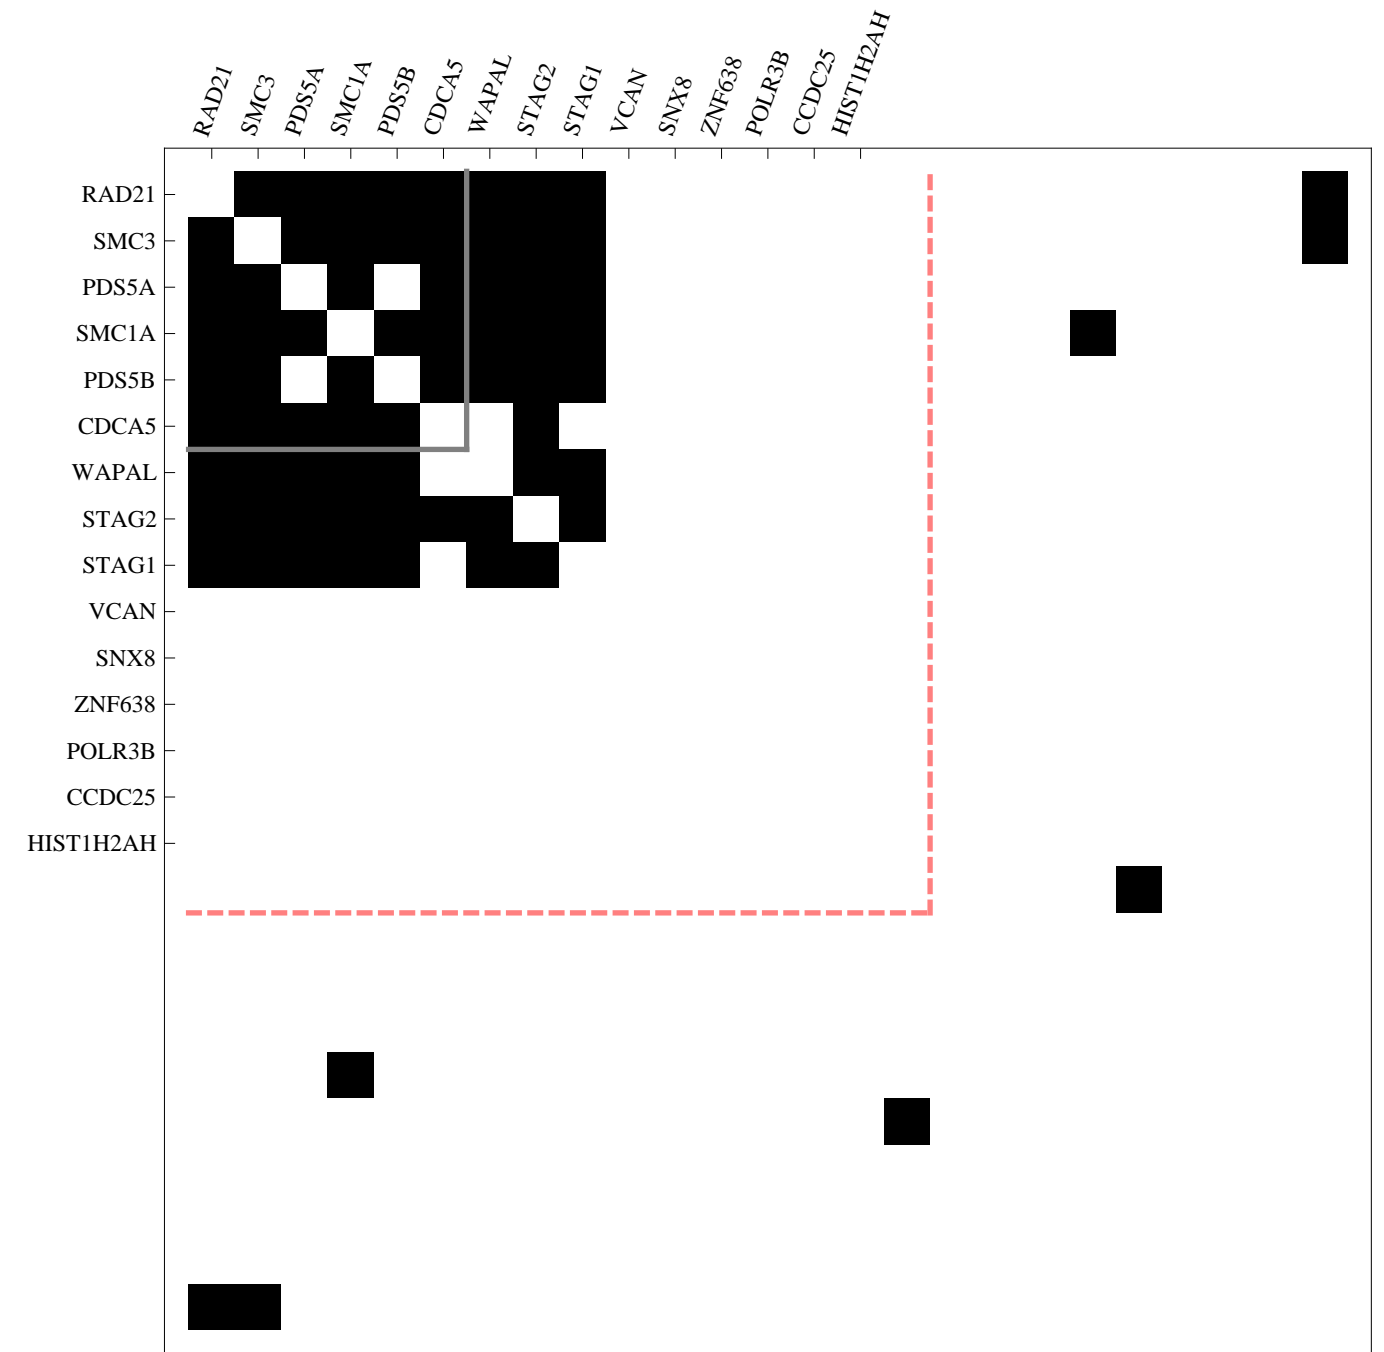



BLM complex II

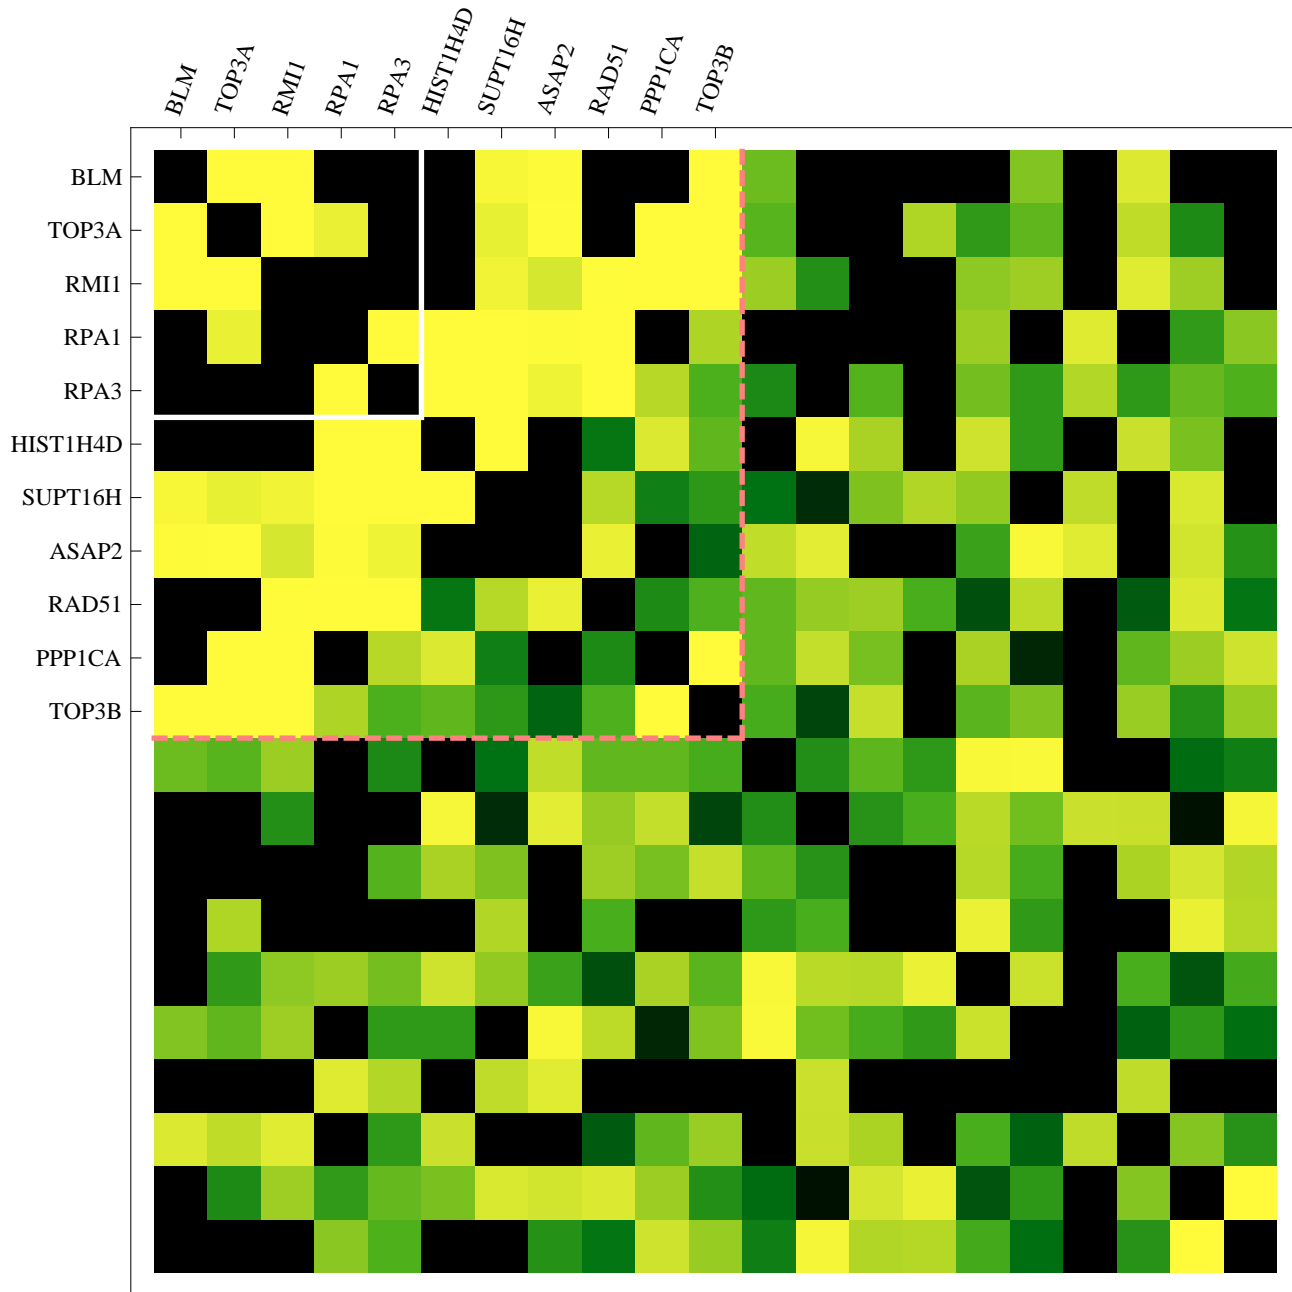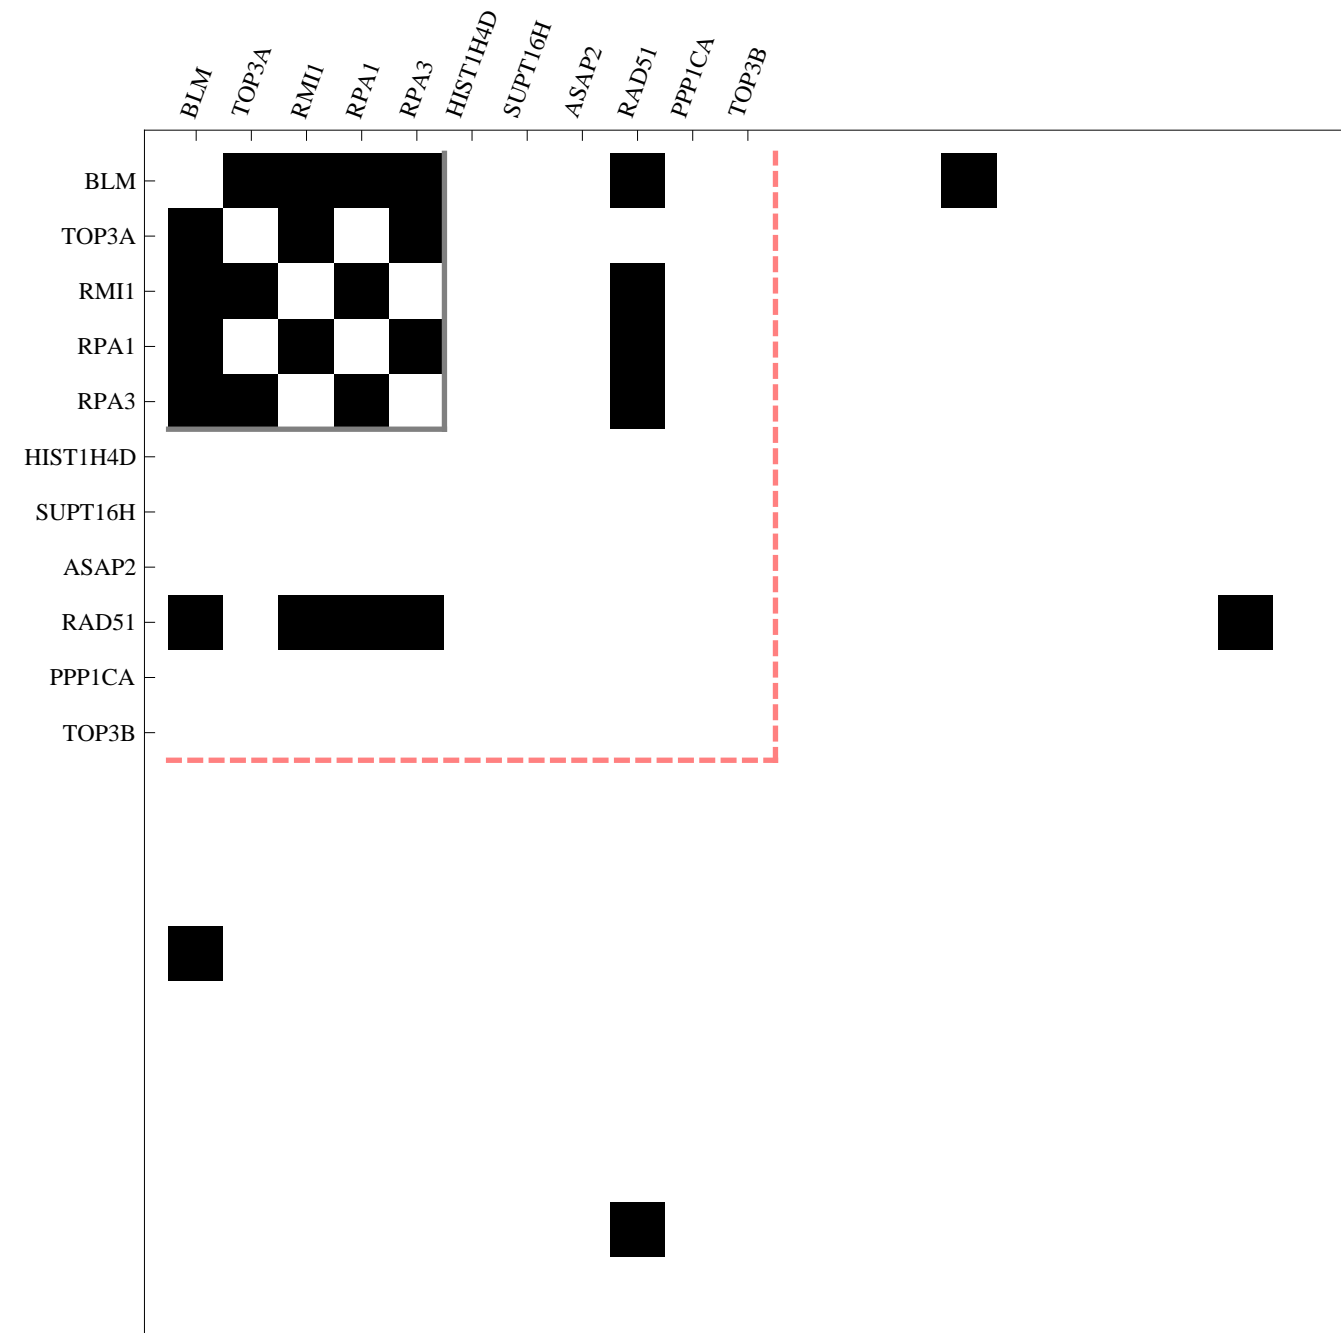





# BRD4 complex

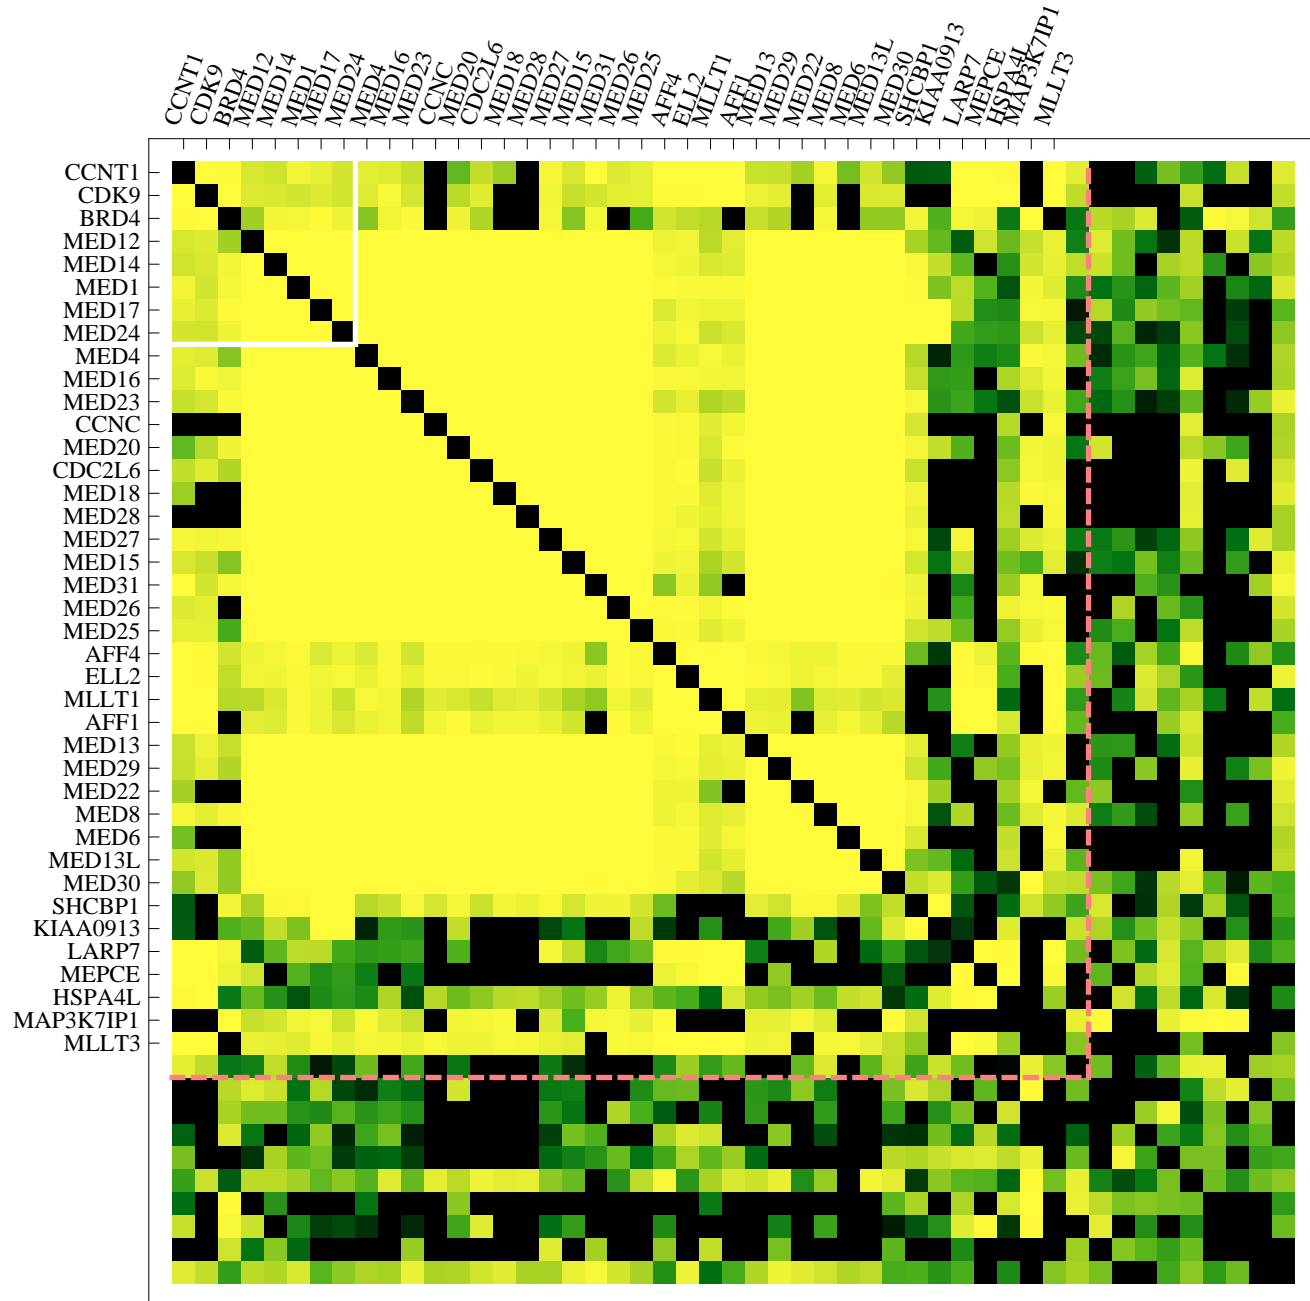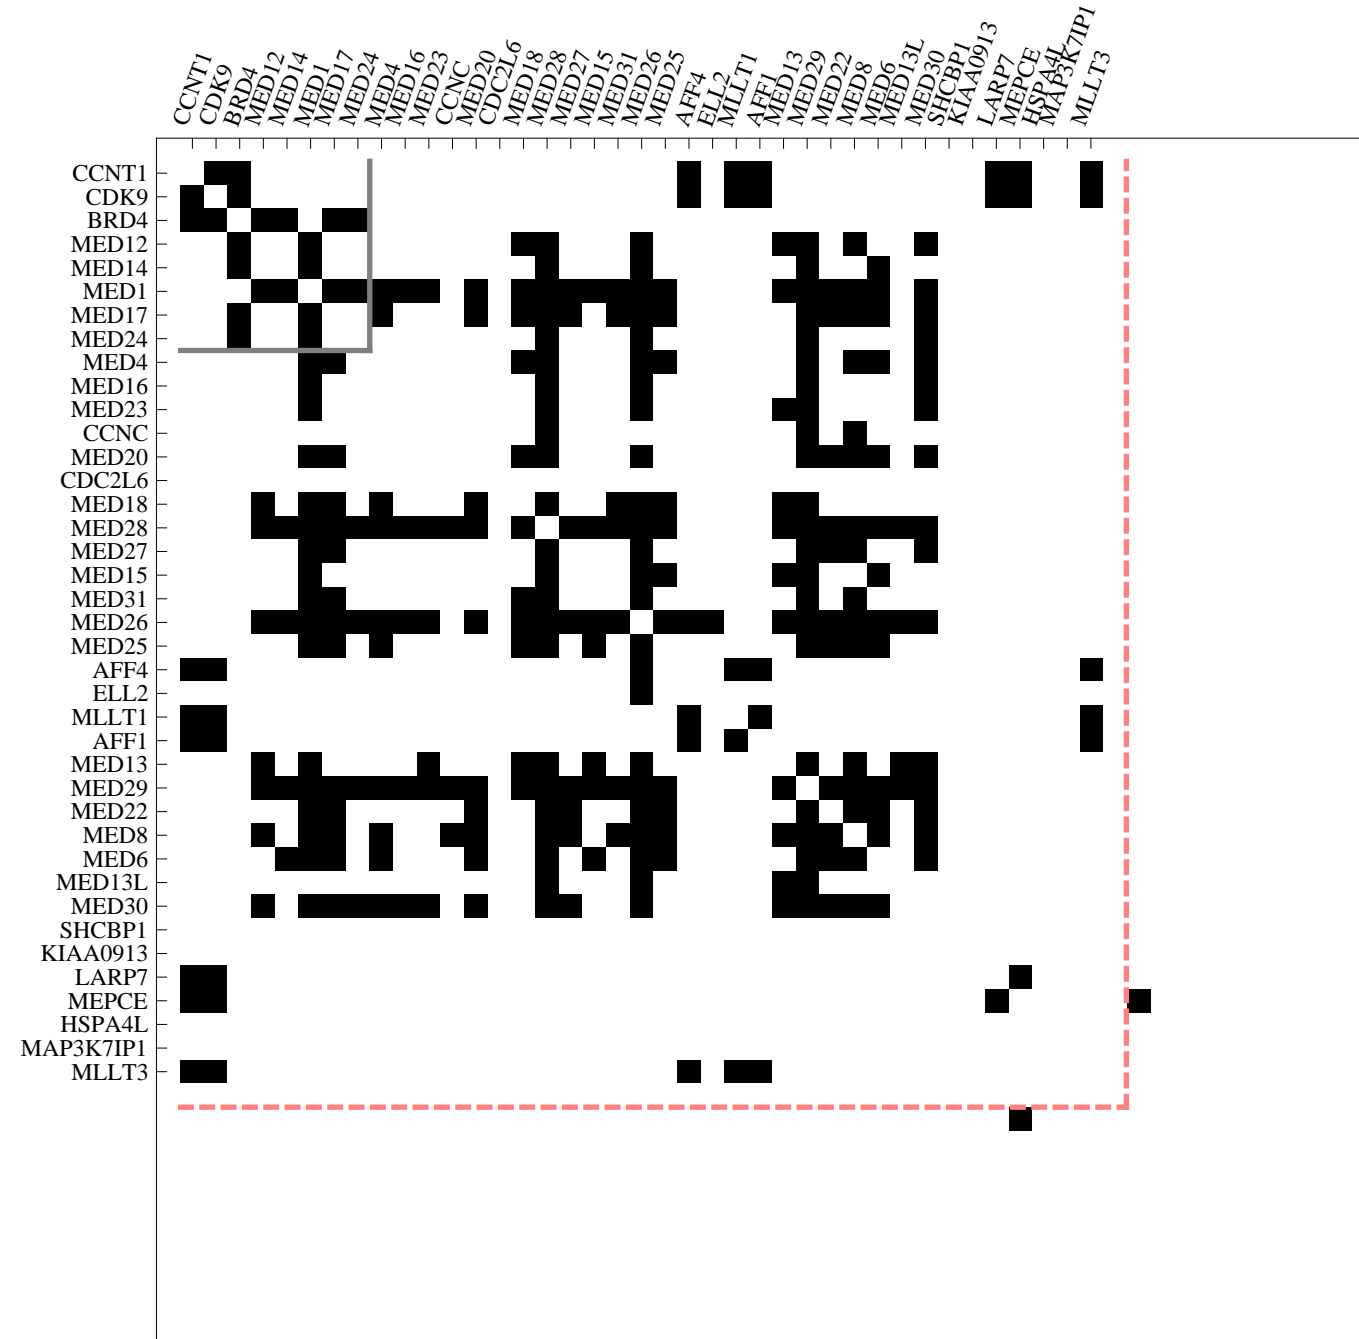









EIF3 complex (EIF3A, EIF3B, EIF3G, EIF3I, EIF3C)

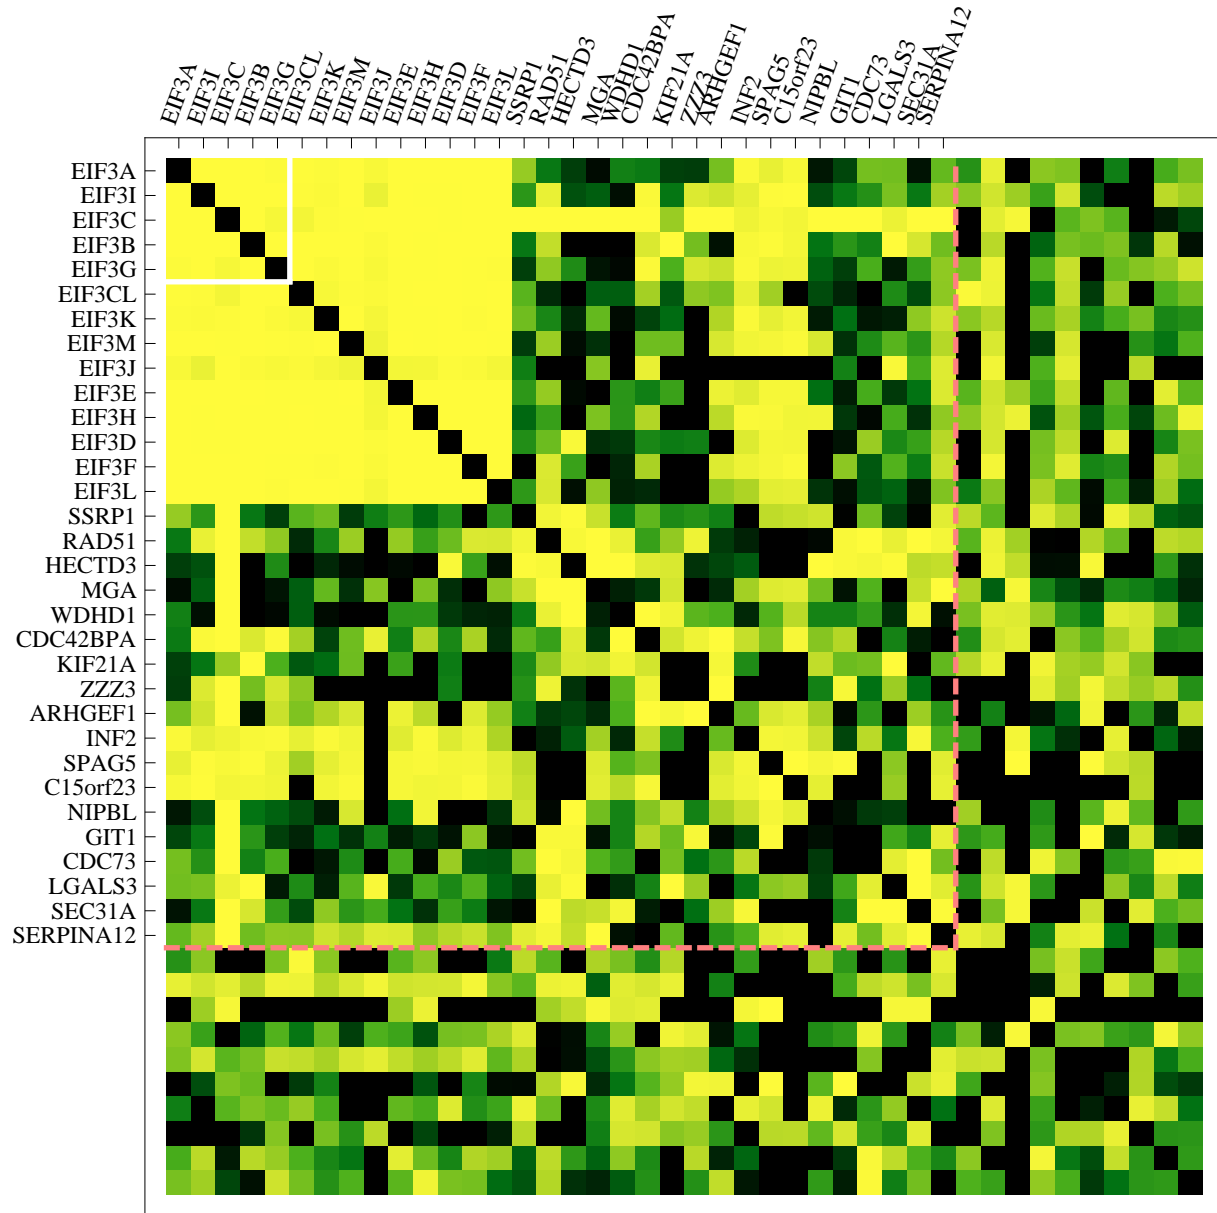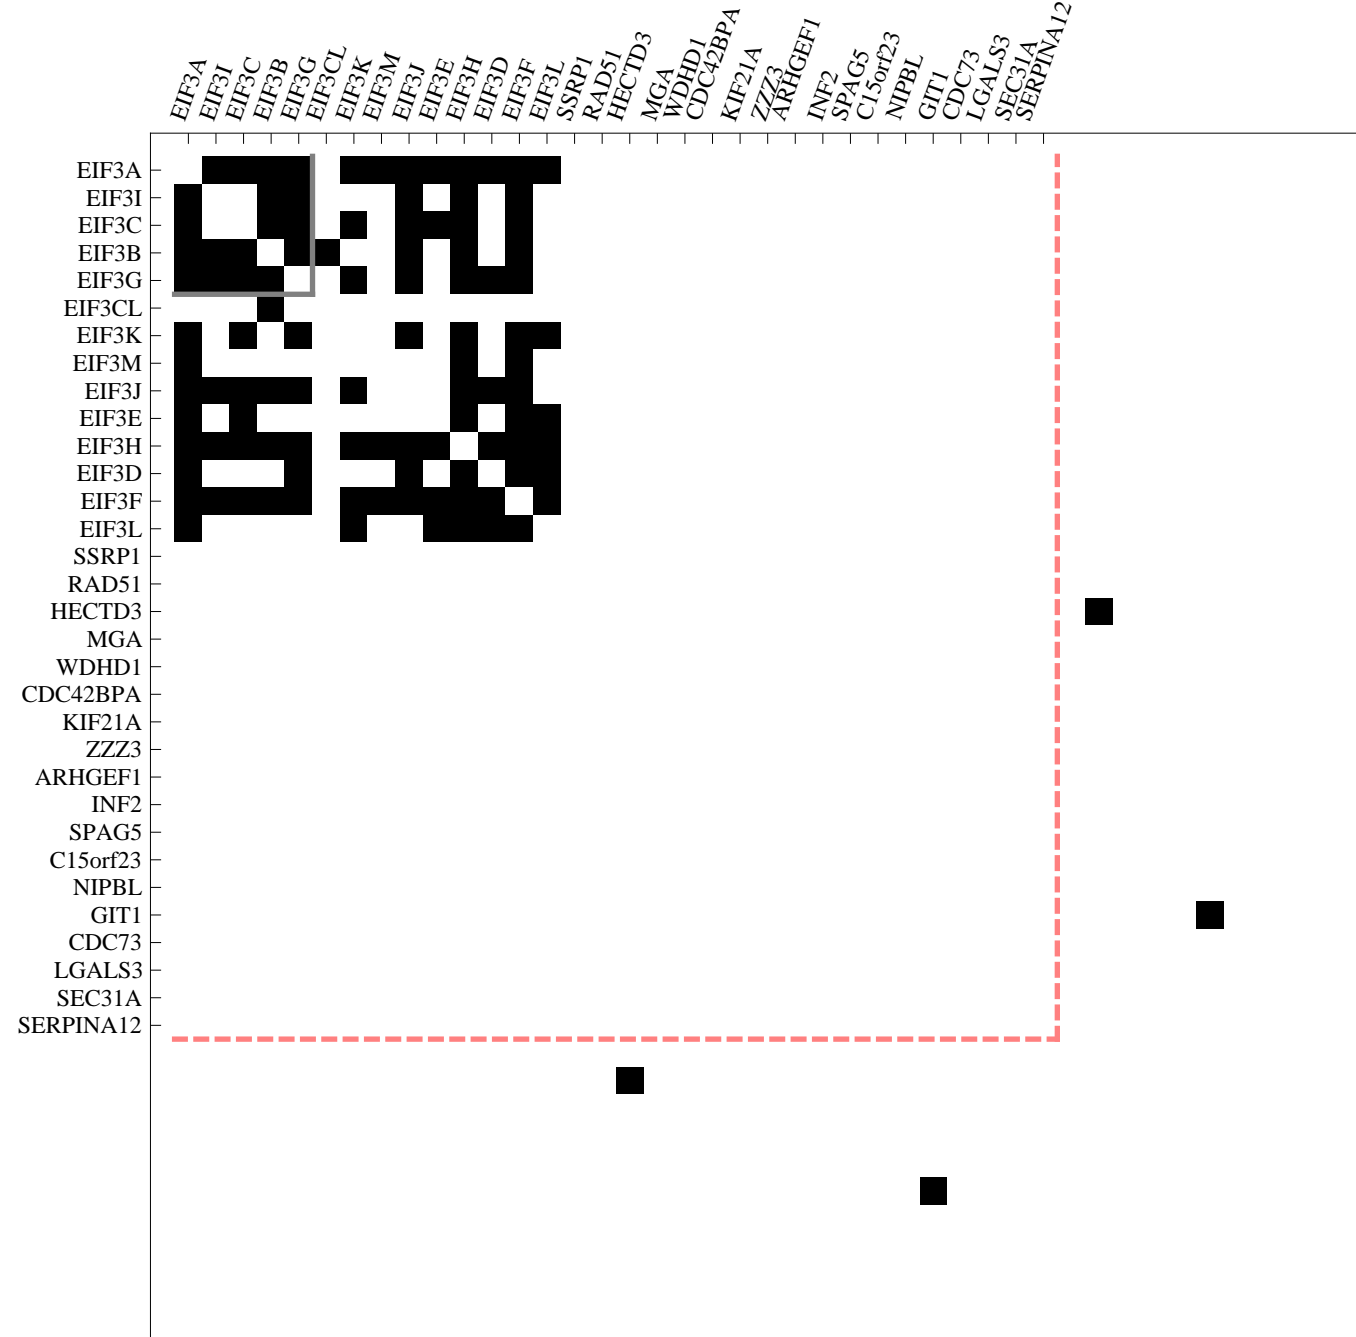







Sororin-cohesin complex

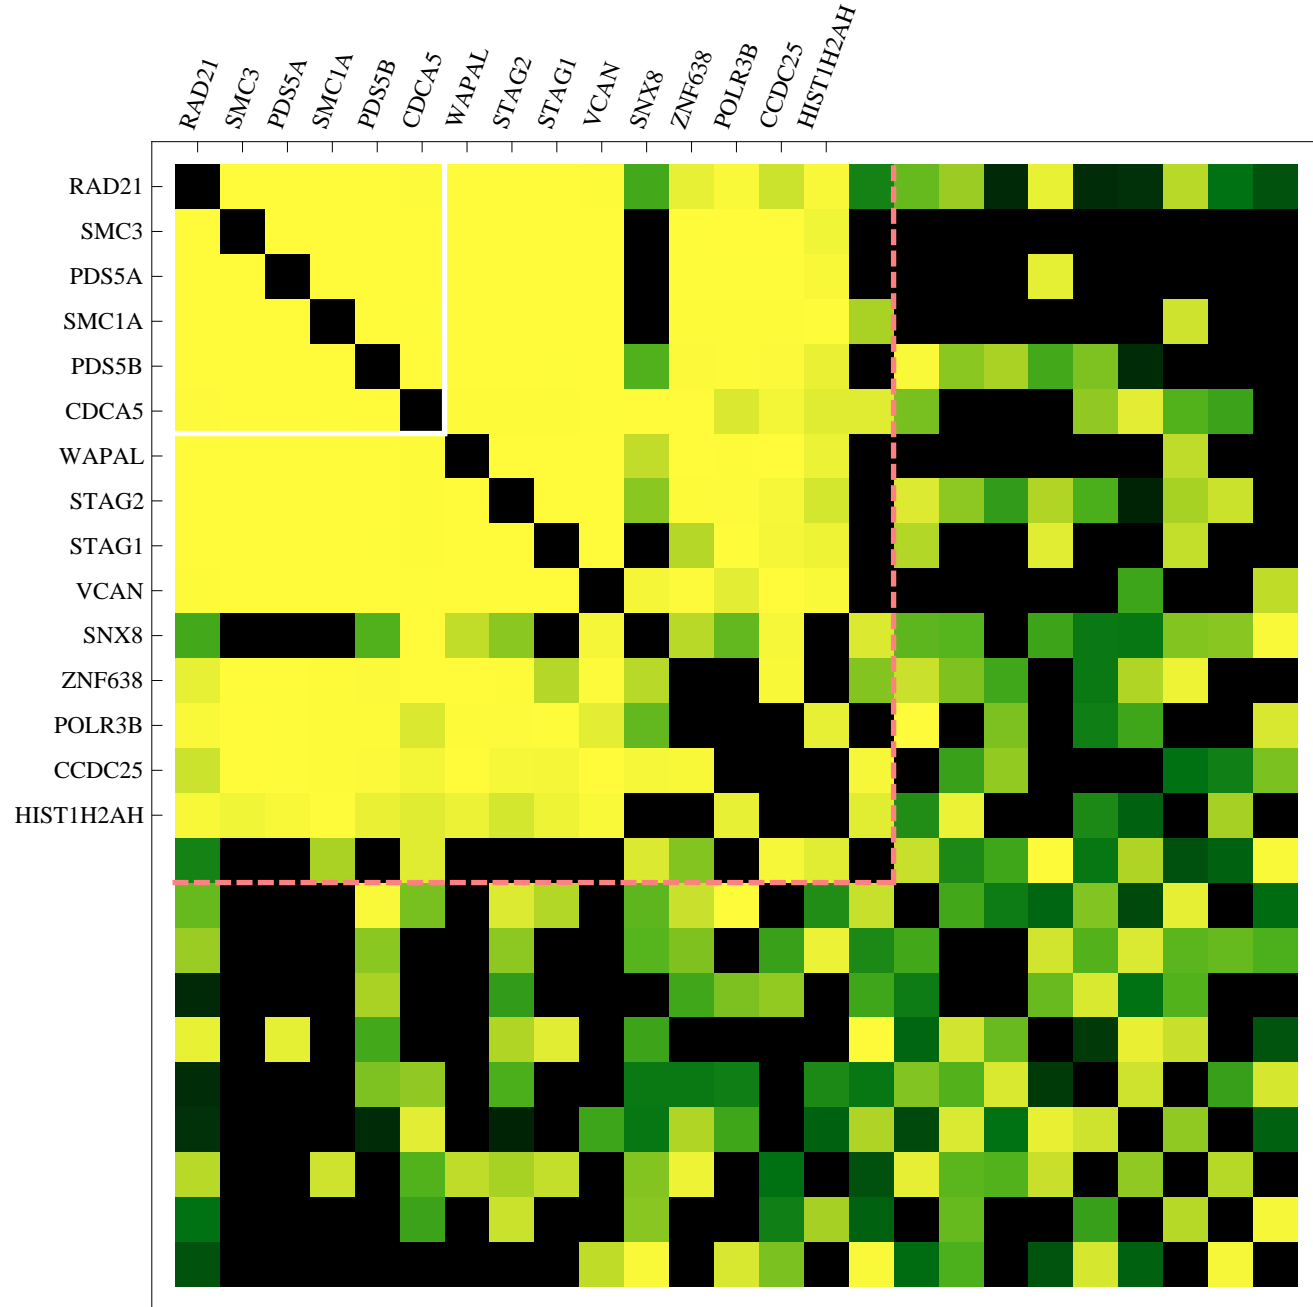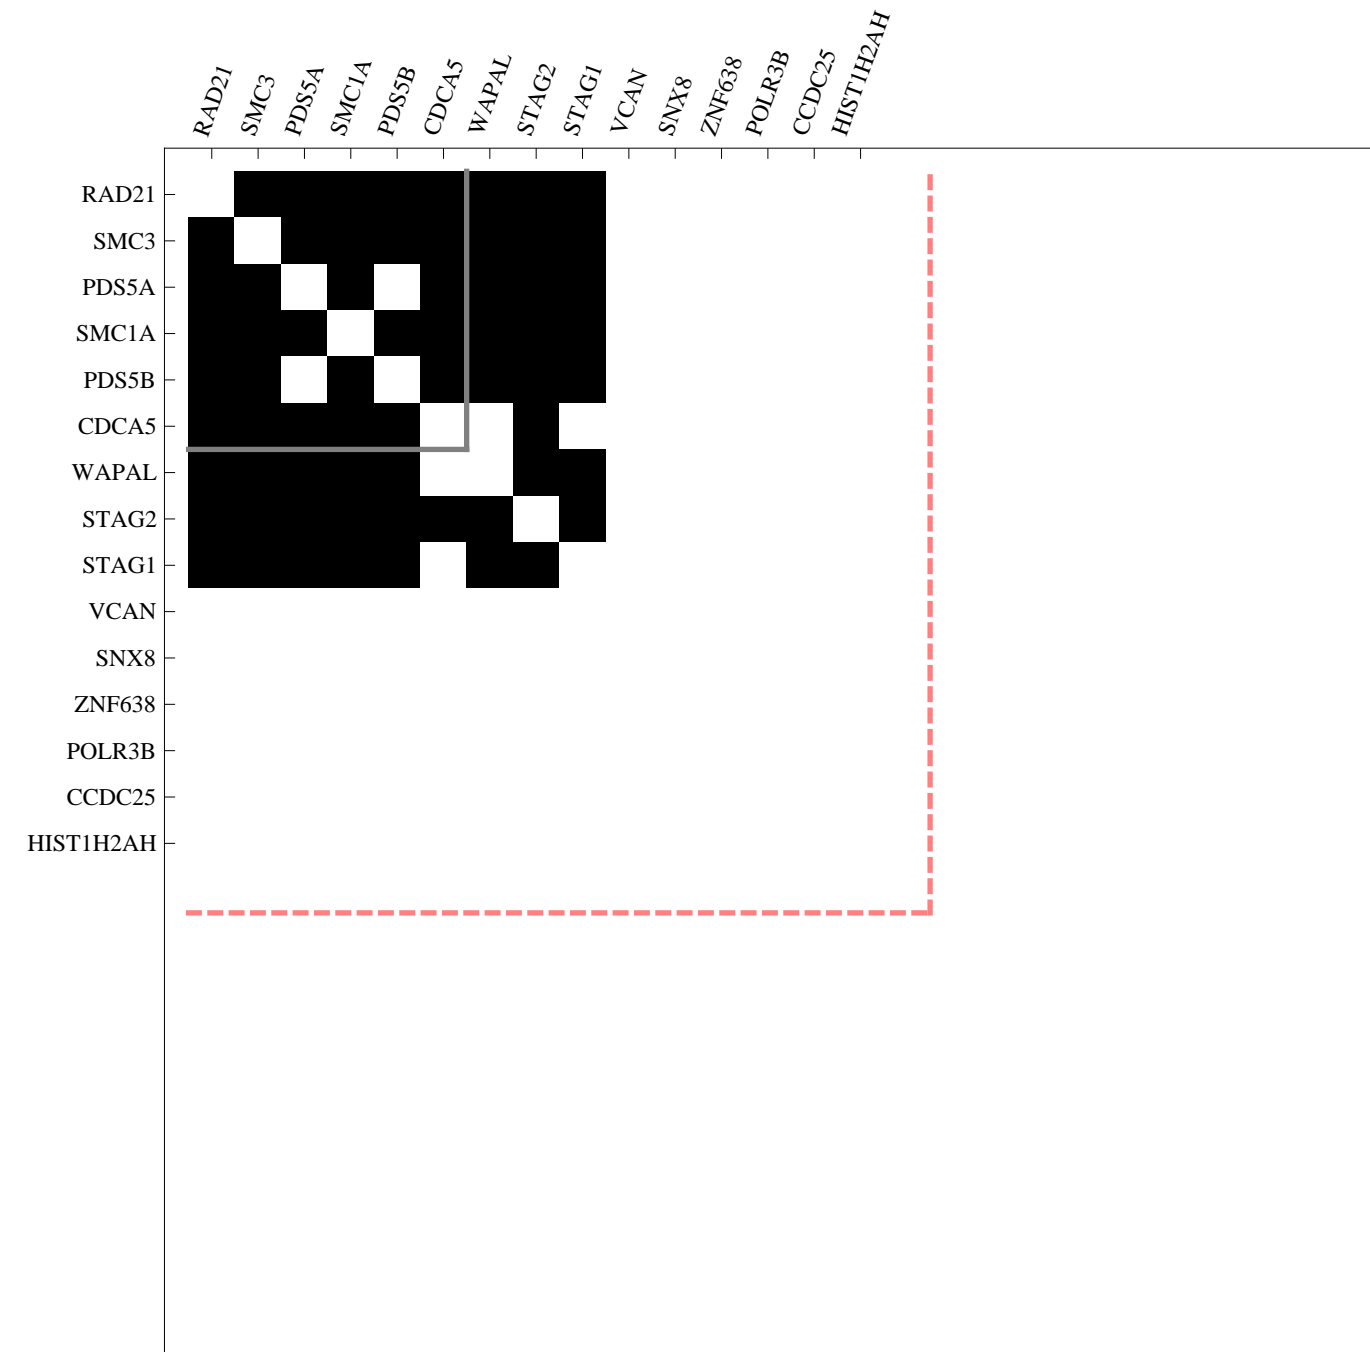

### Mediator complex

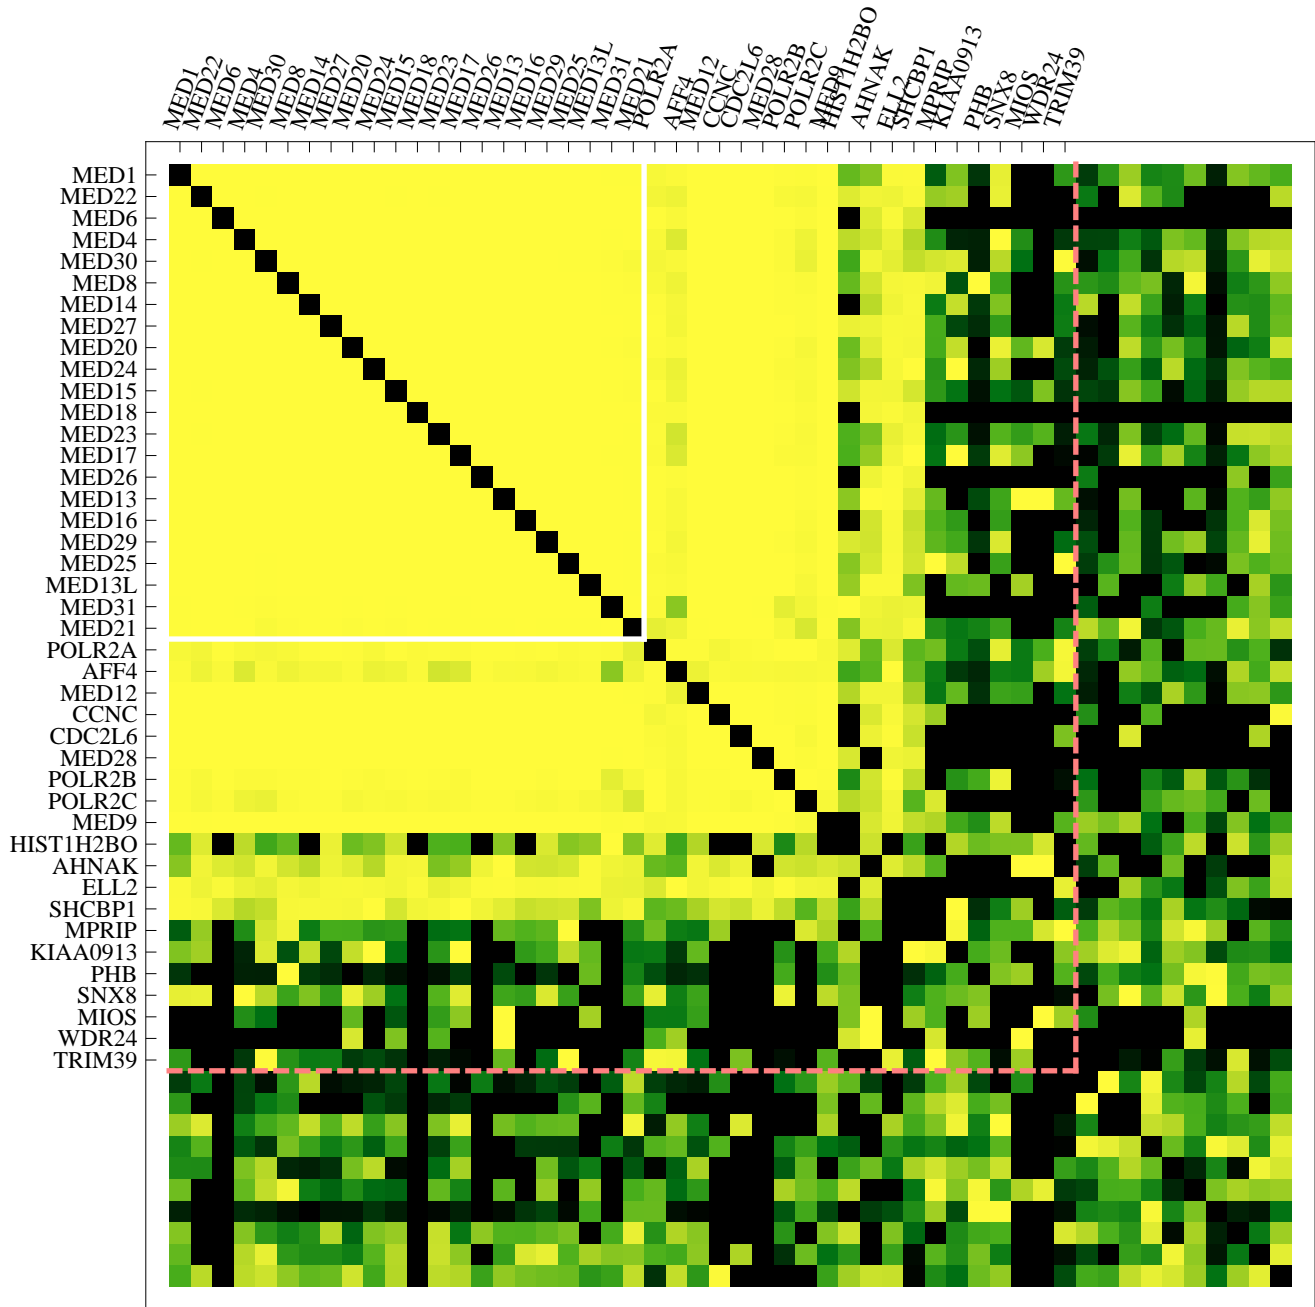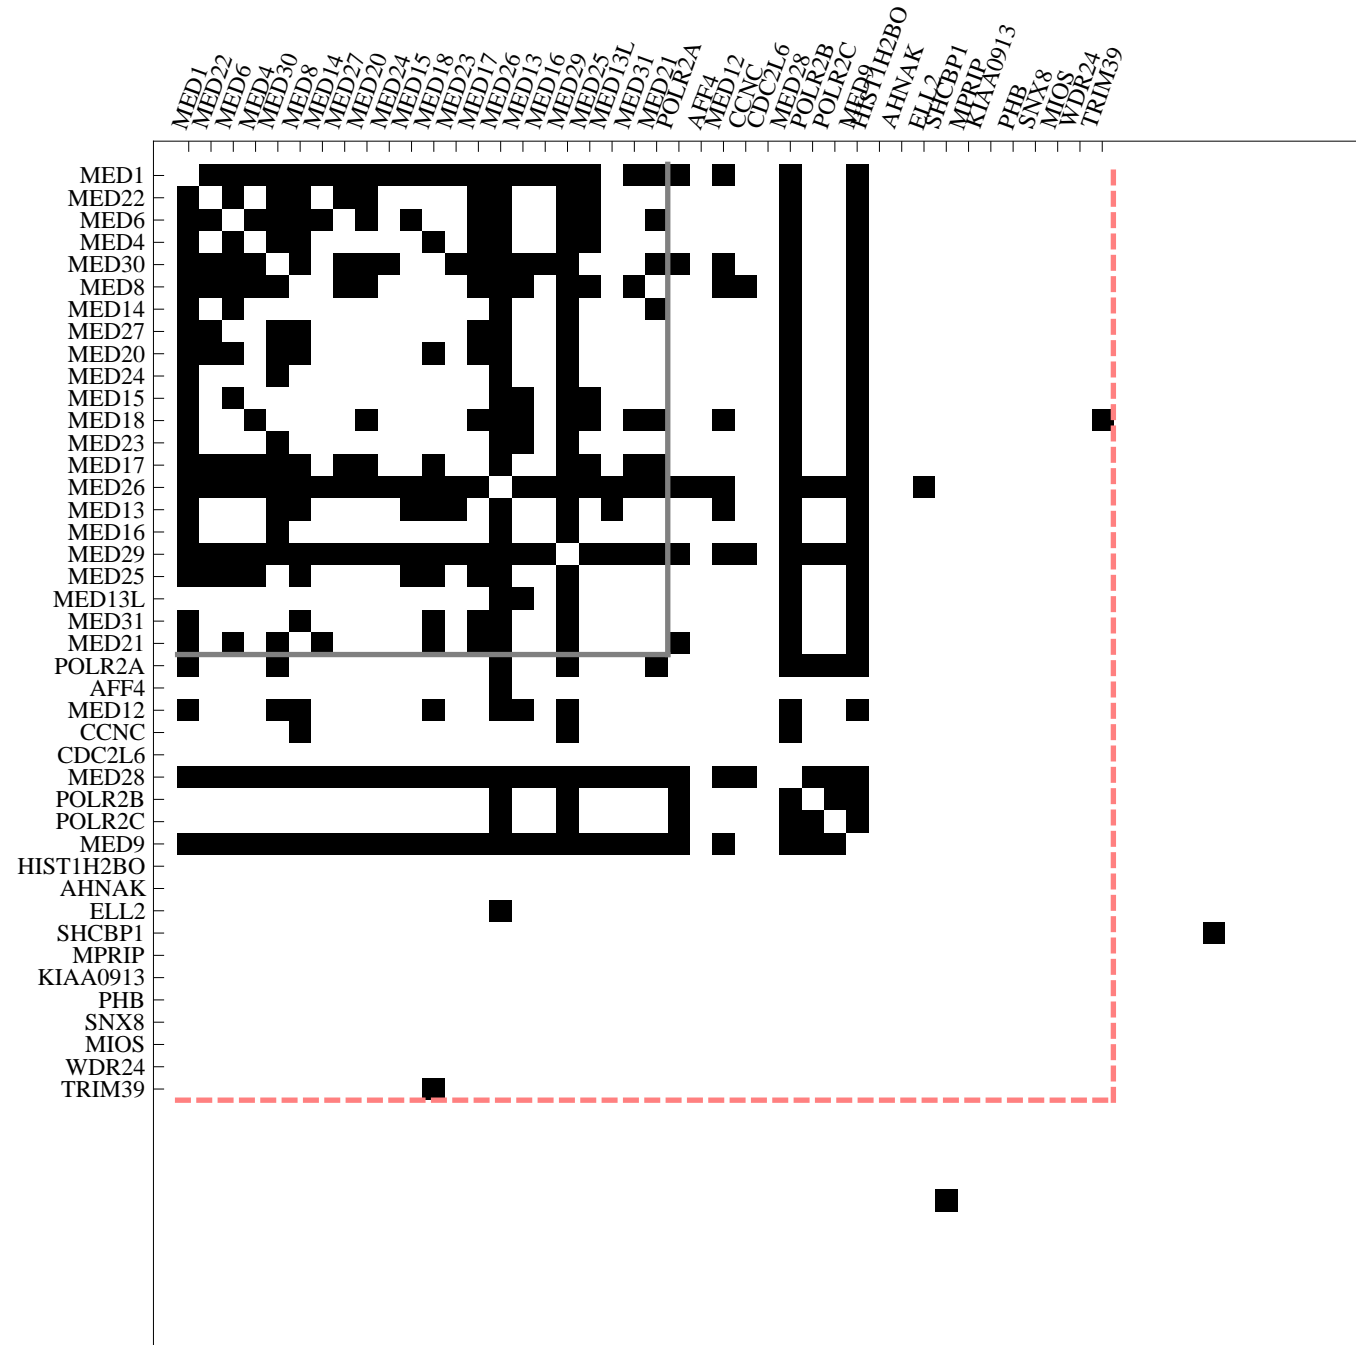

26S proteasome

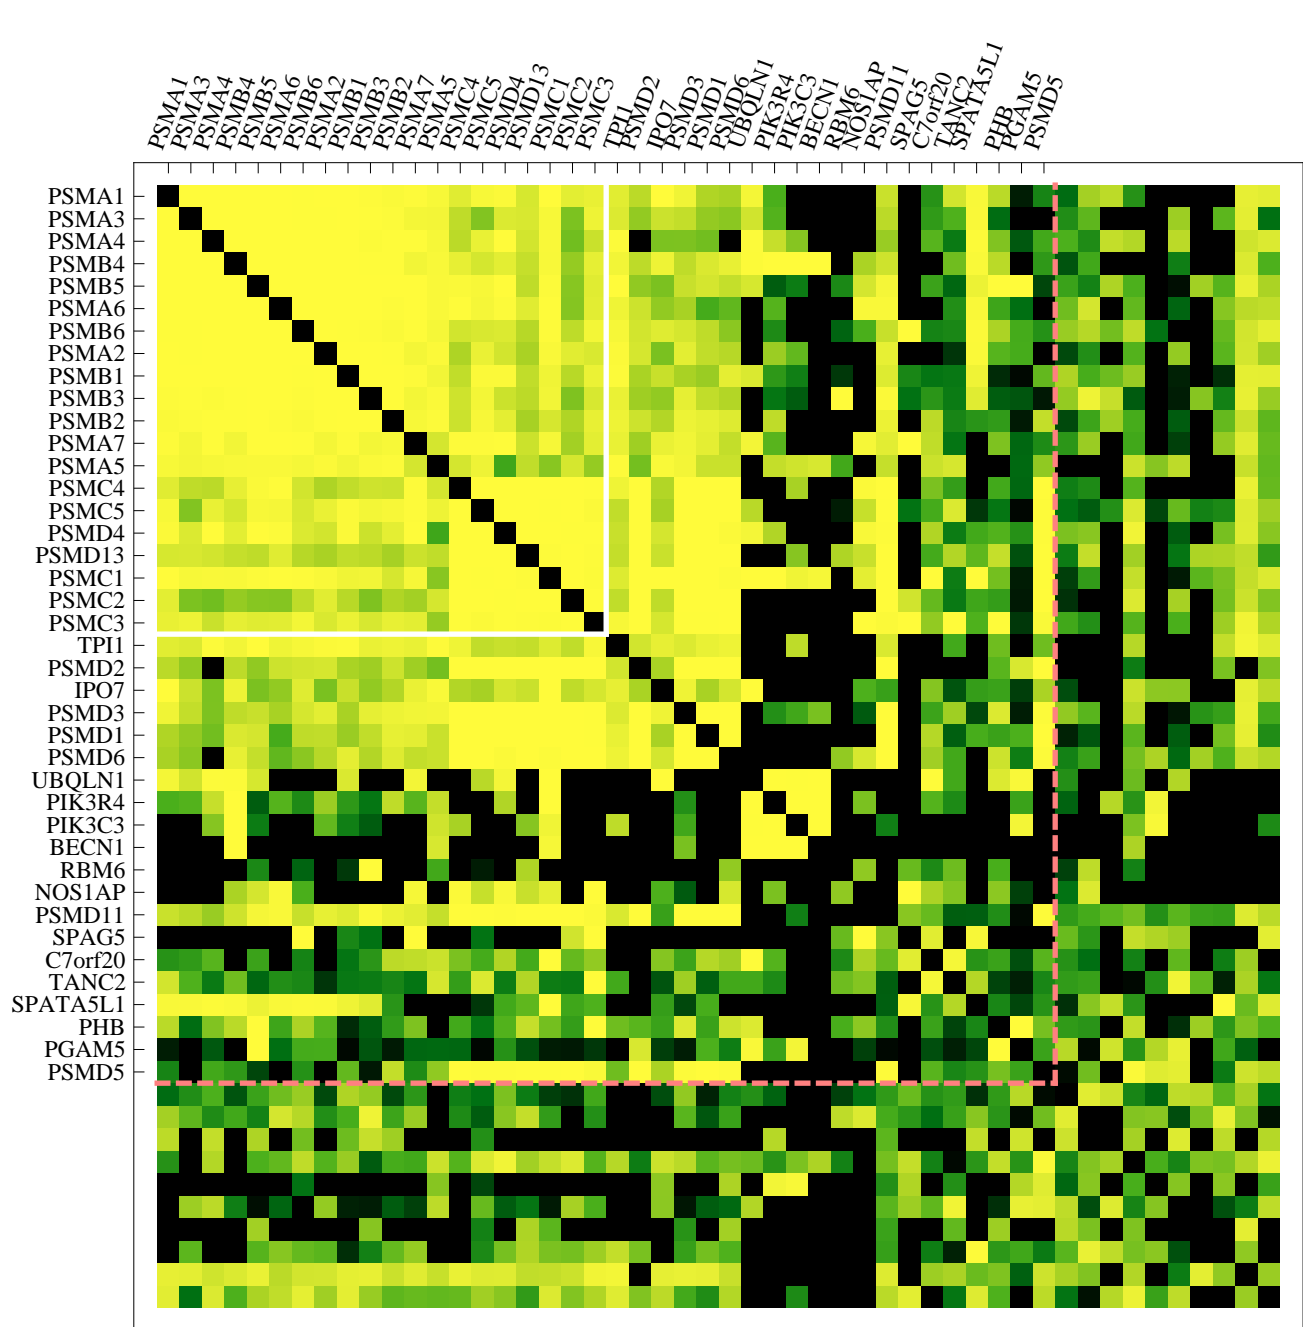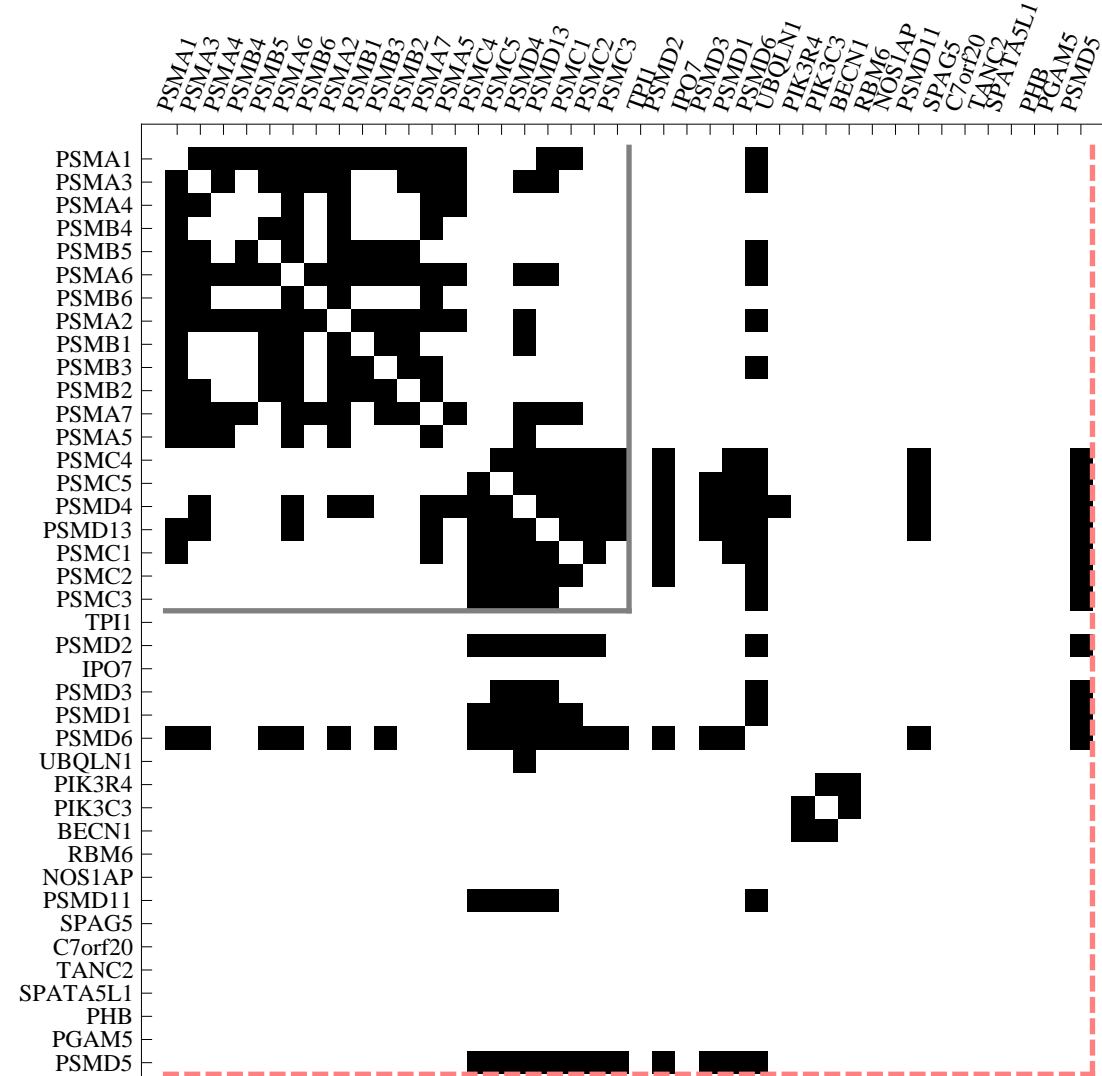

TFIIH transcription factor complex (ERCC2, ERCC3, GTF2H1, CDK7, CCNH, GTF2H

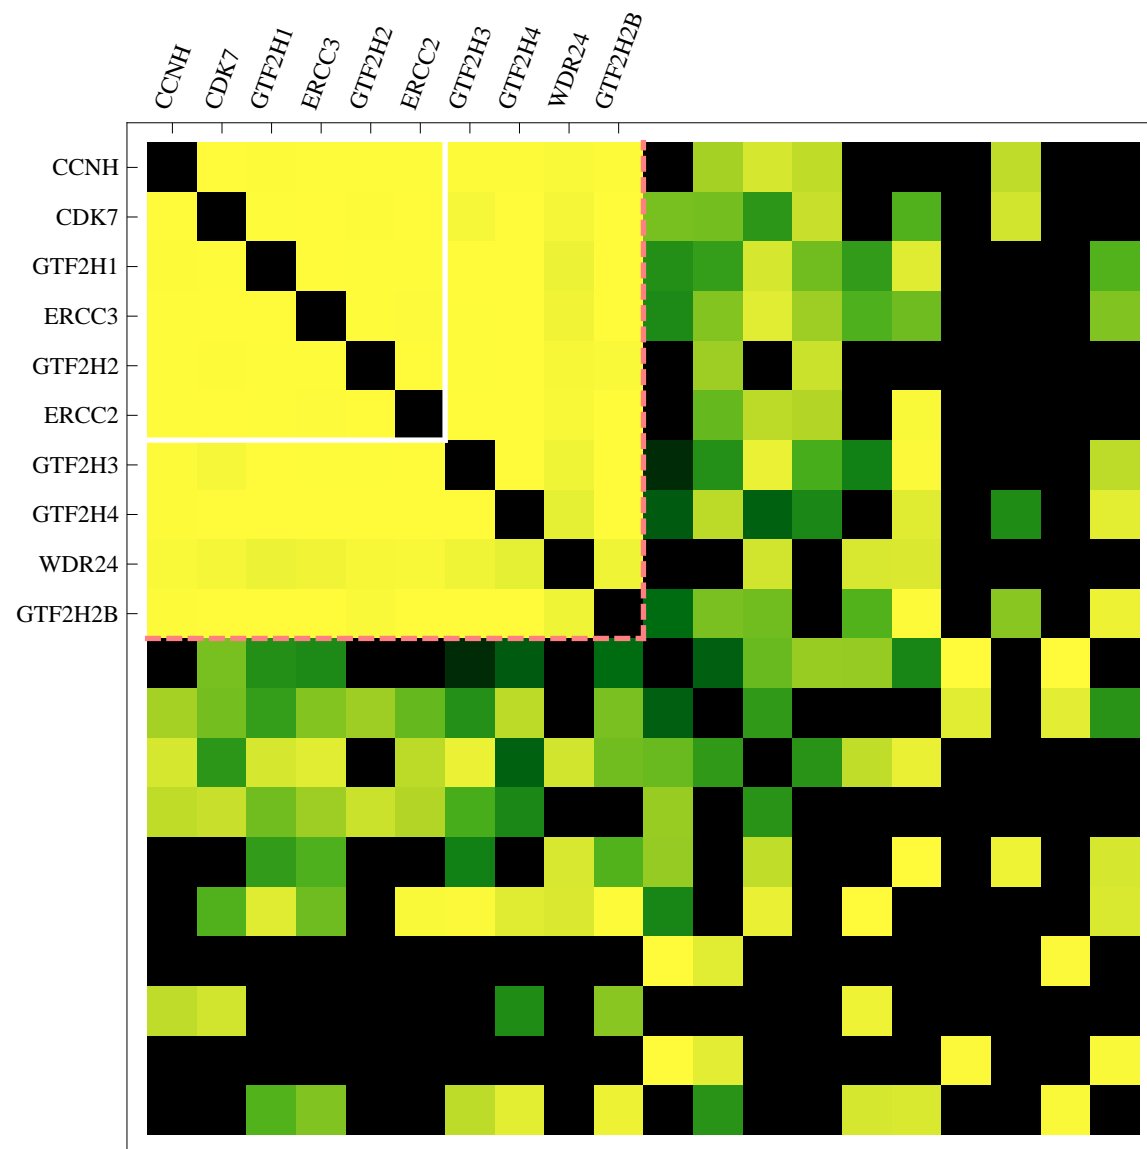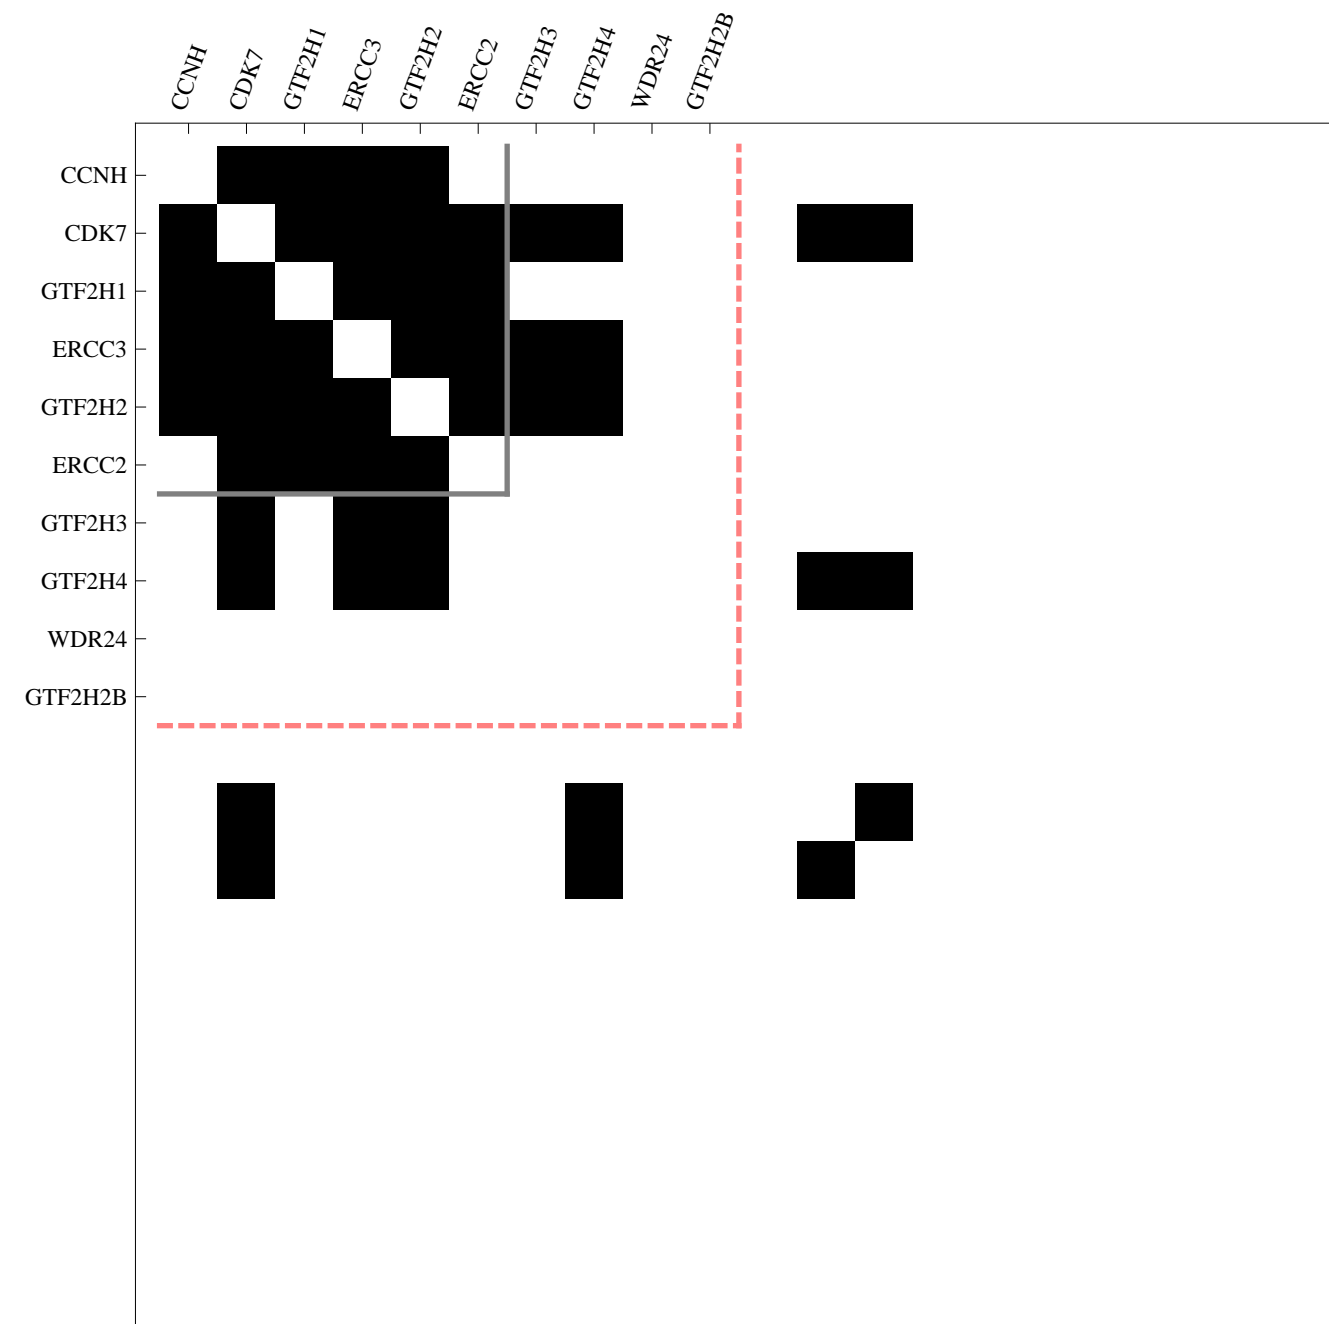

20S proteasome

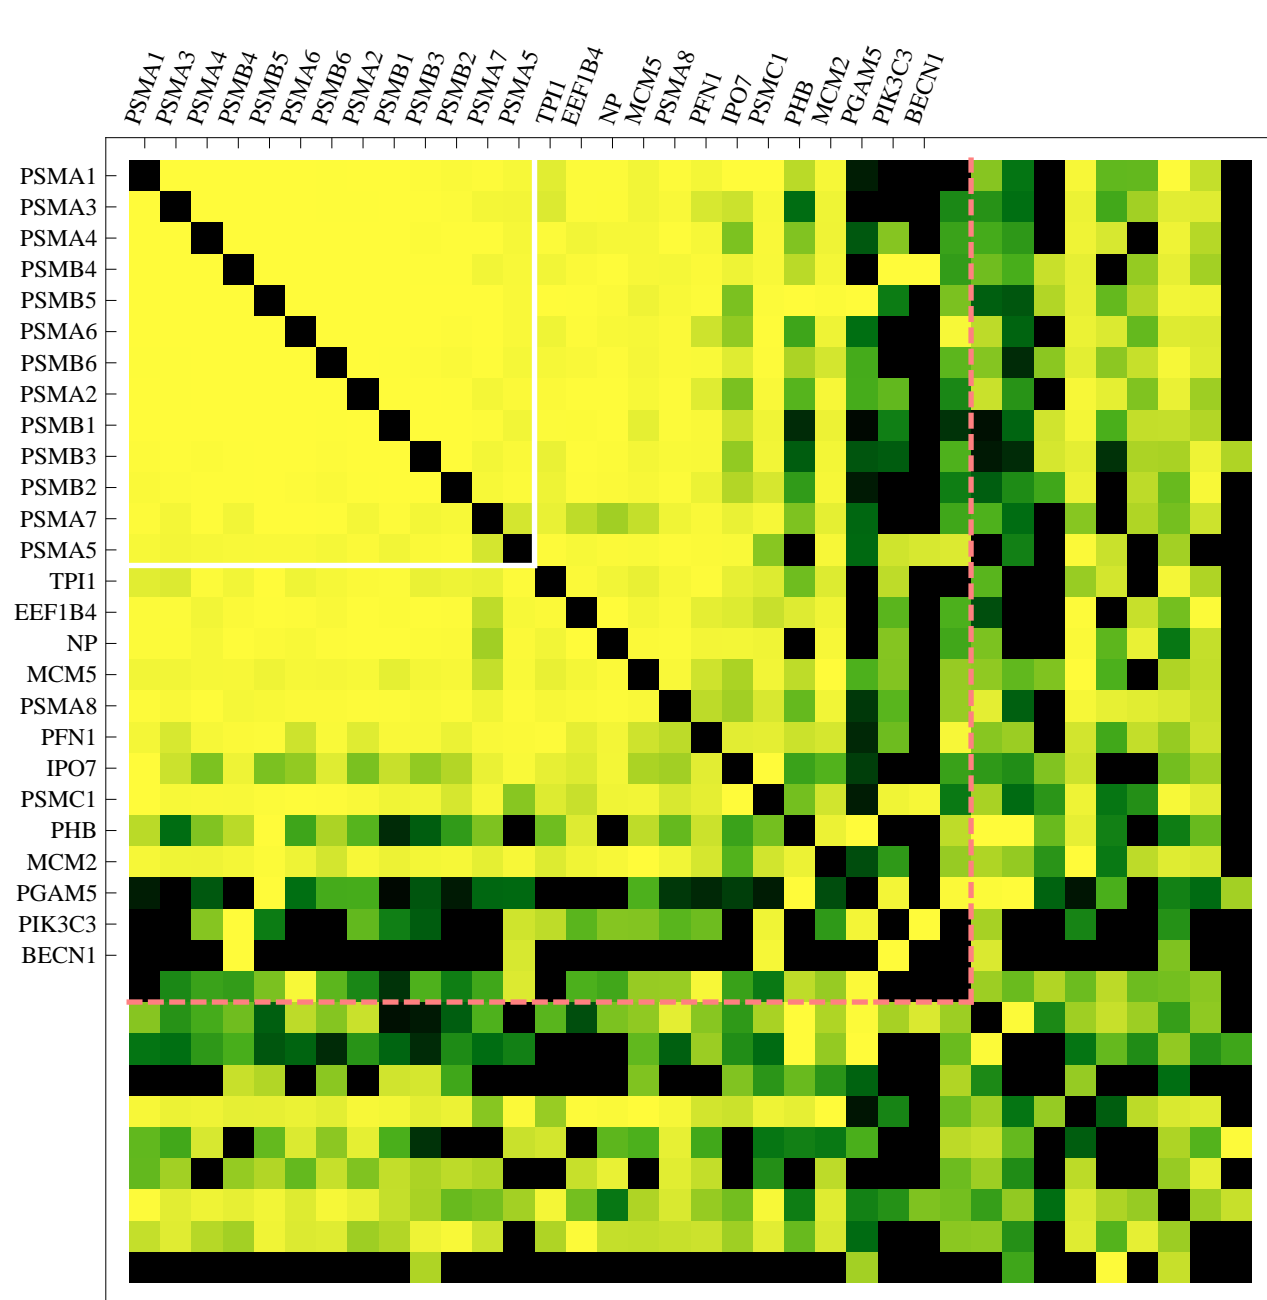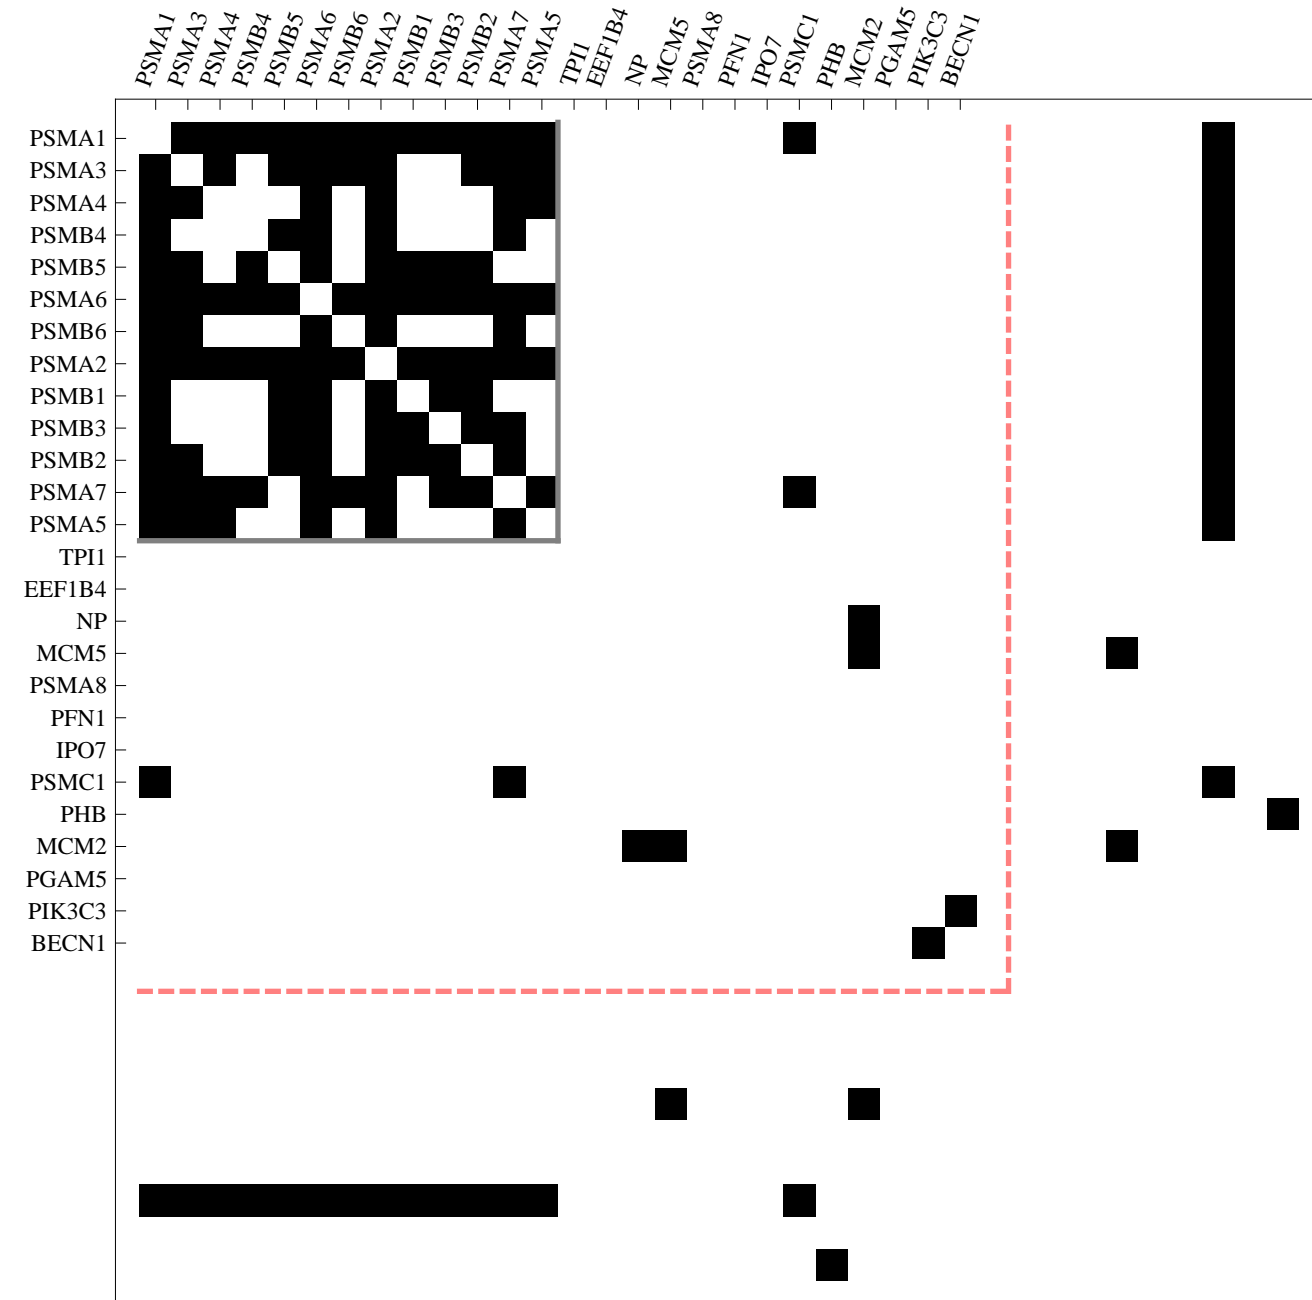







# ARC-L complex

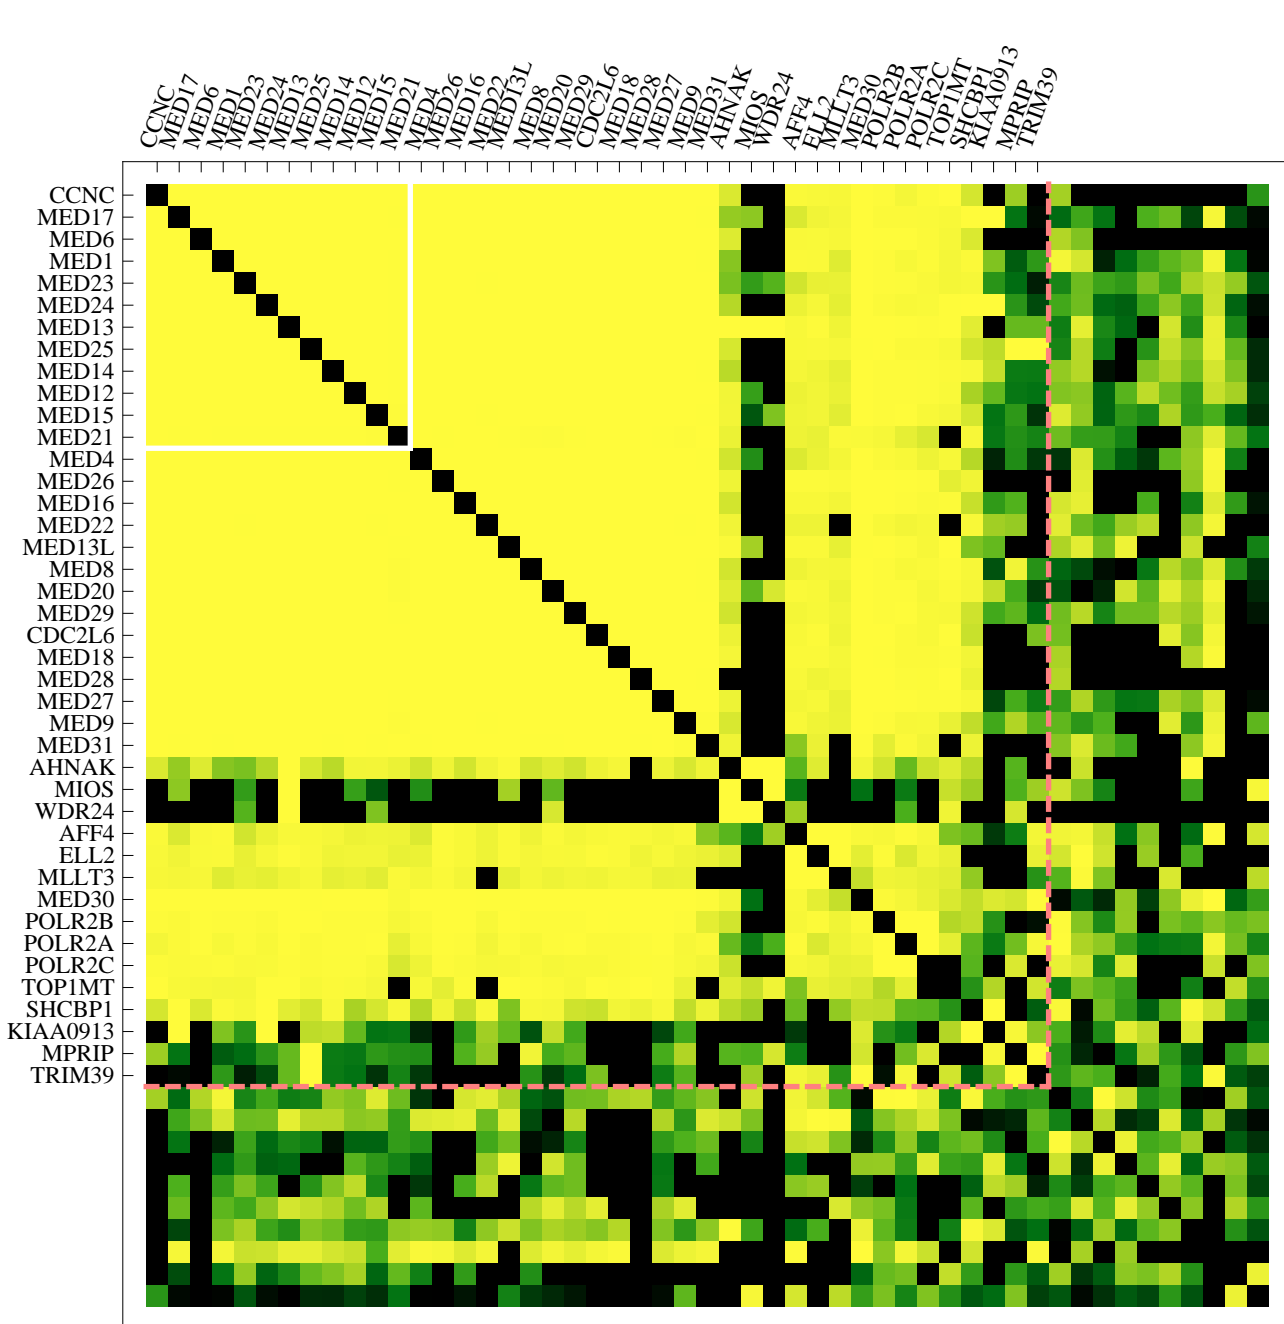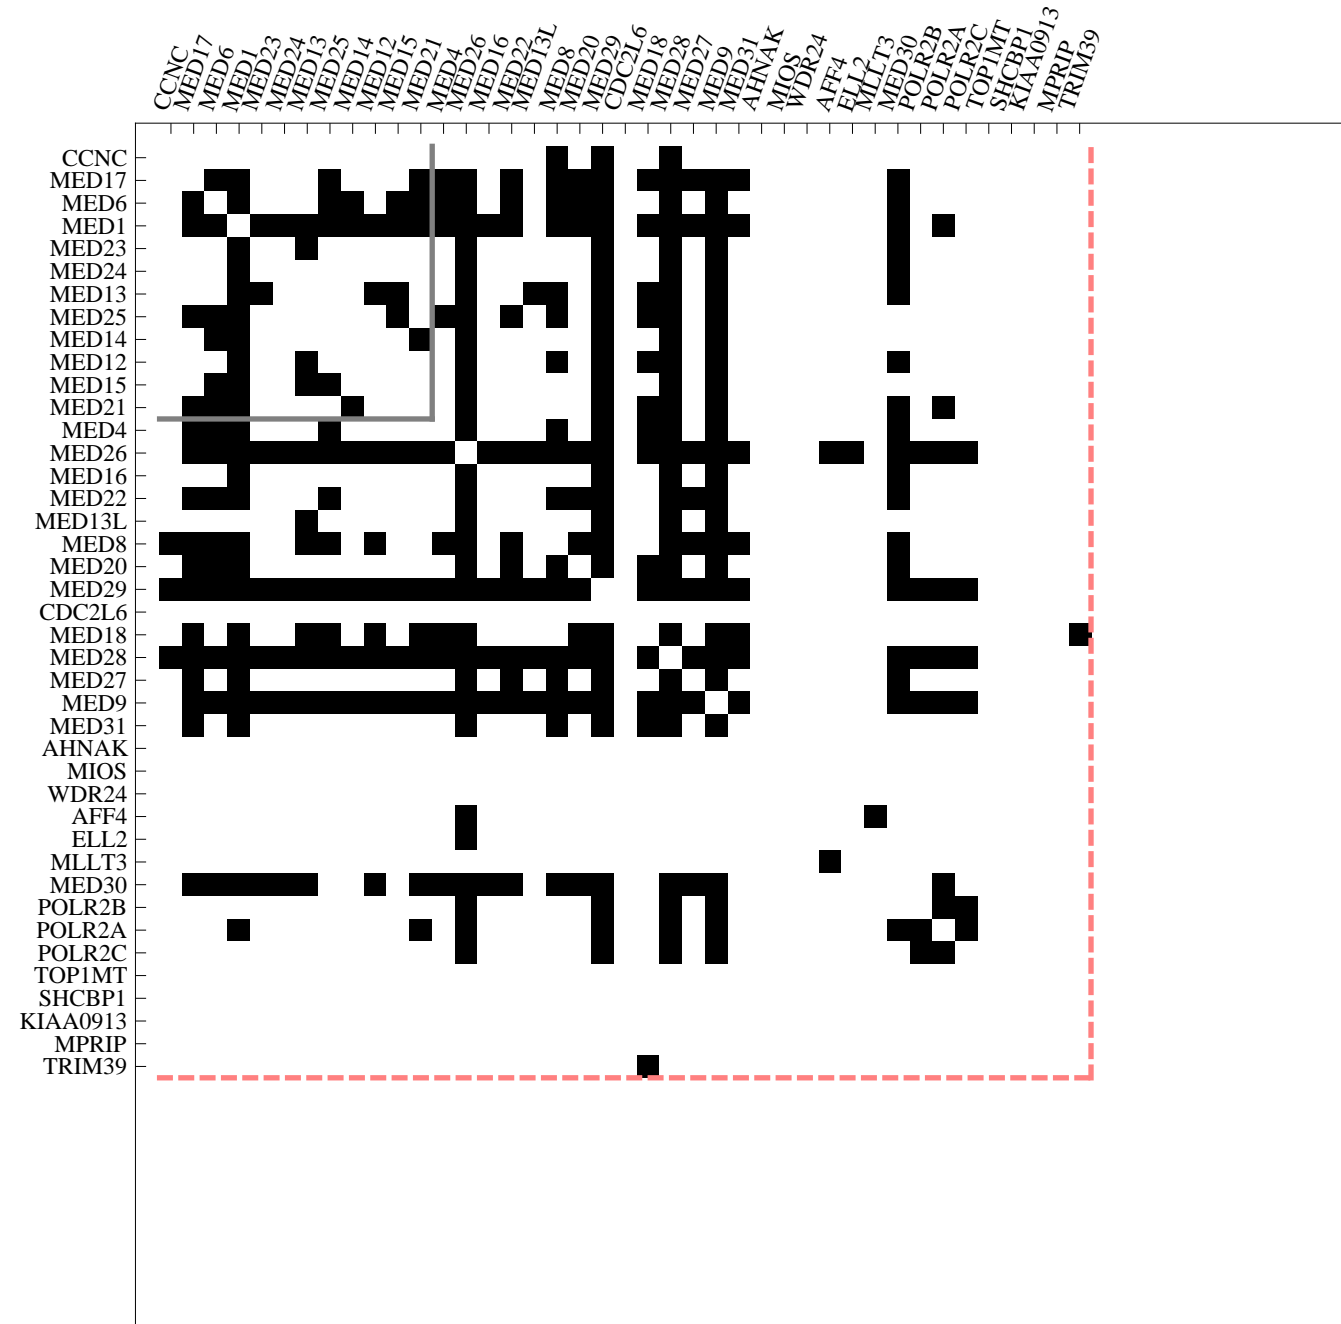

PC2 complex

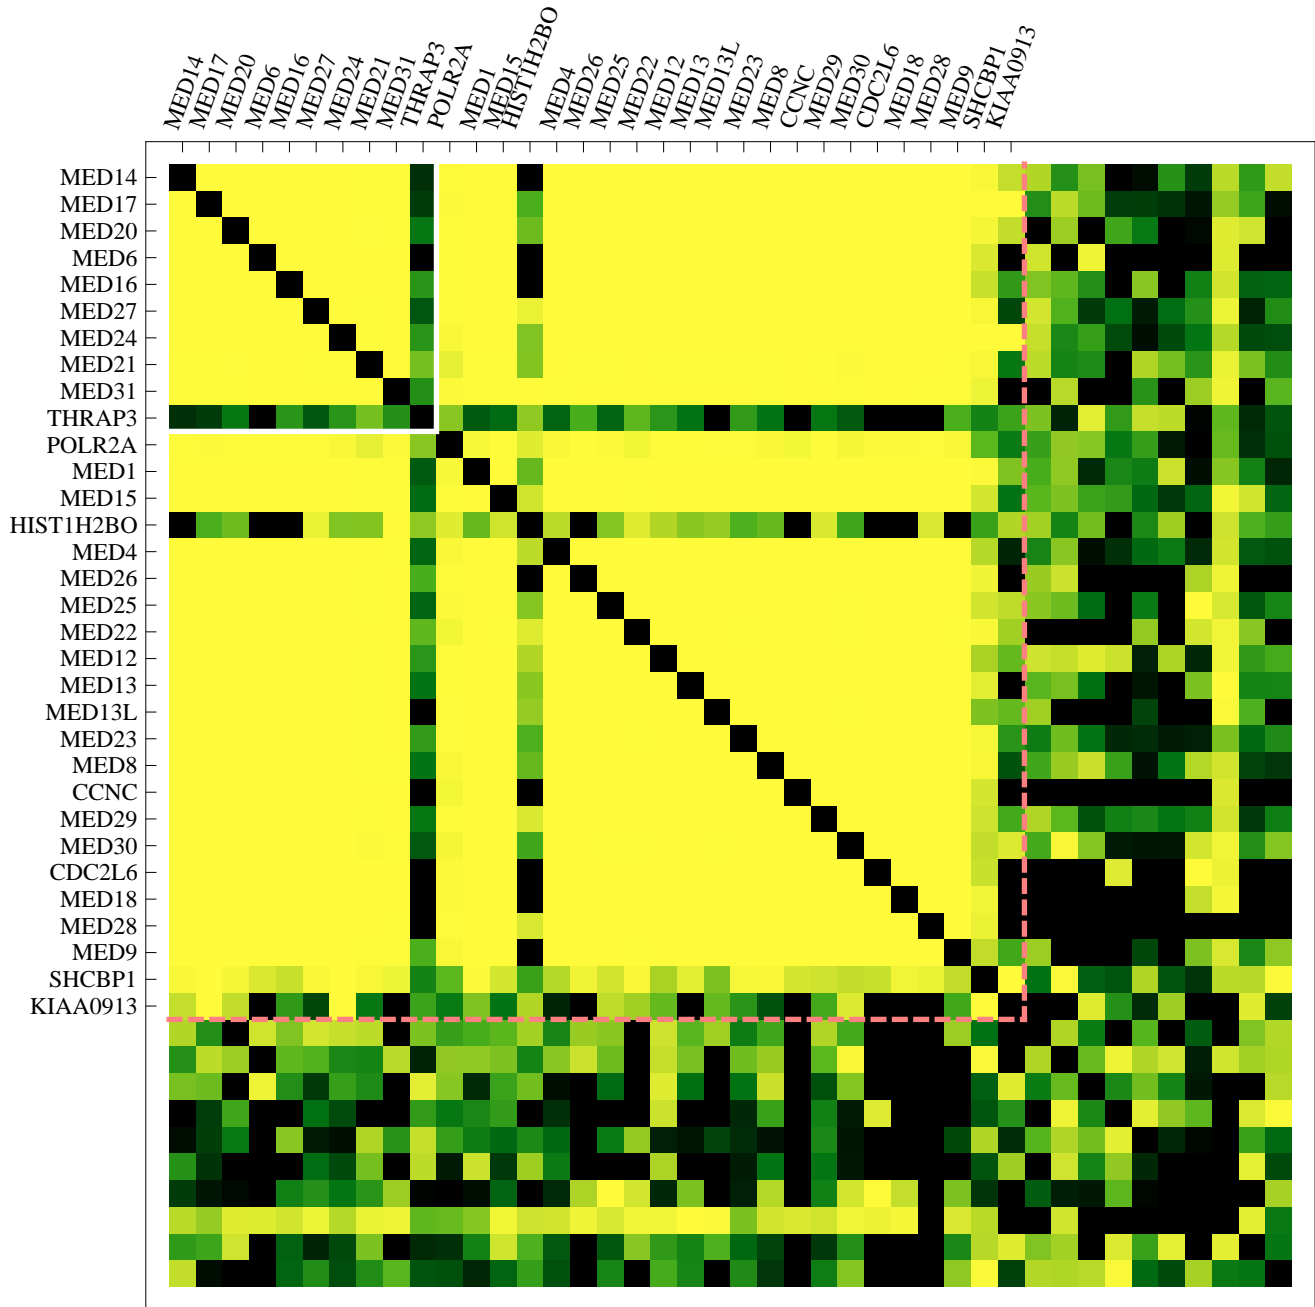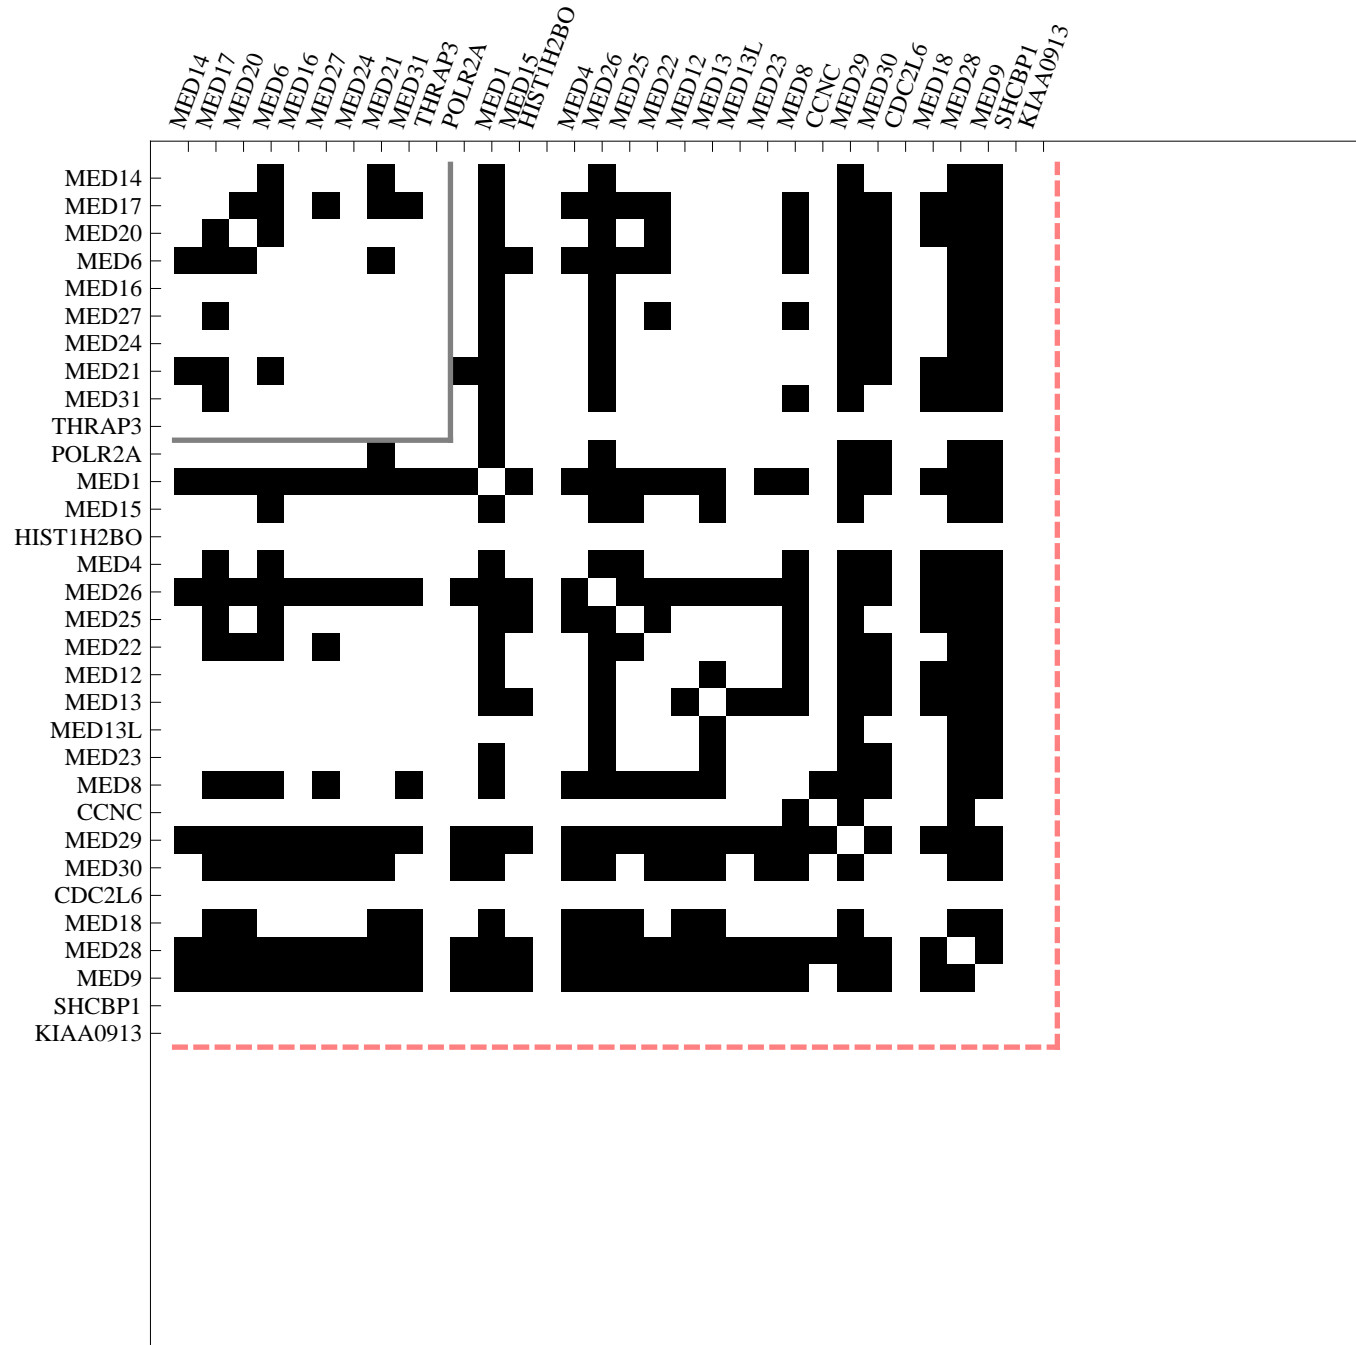

Supplement: 1752-0509-6-89-S3.pdf [file 1752-0509-6-89-S3.pdf]
